# Supplementary material for: One-pot and divergent synthesis of polysubstituted quinolin-2(1H)-ones and oxireno[2,3-c]quinolin-2(1aH,3H,7bH)-ones via sequential Ugi/Knoevenagel condensation/hydrolysis and Ugi/Corey–Chaykovsky epoxidation reactions
Source: Royal Society of Chemistry journal article supplement (doi:10.1039/d2qo01130a), 2022-01-01

## *Supporting Information*

# **One-Pot and Divergent Synthesis of Polysubstituted Quinolin-2(1*H*)-ones and Oxireno[2,3-*c*]quinolin-2(1*aH*,3*H*,7*bH*)-ones via Sequential Ugi/Knoevenagel Condensation/Hydrolysis and Ugi/Corey-Chaykovsky Epoxidation Reactions**

Mao-Lin Yang, Hong-Ling Pan, Han-Han Kong and Ming-Wu Ding\*

*Key Laboratory of Pesticide & Chemical Biology of Ministry of Education, Hubei International Scientific  
and Technological Cooperation Base of Pesticide and Green Synthesis, Central China Normal University,  
Wuhan 430079, P. R. China*

## **Content**

|                                                                                                           |       |
|-----------------------------------------------------------------------------------------------------------|-------|
| 1. General Information.....                                                                               | 2     |
| 2. Experimental Procedures and Characterization Data.....                                                 | 2-12  |
| 3. Copies of <sup>1</sup> H and <sup>13</sup> C NMR spectrum of compound <b>7a-v</b> , <b>10a-l</b> ..... | 13-48 |

## 1. General Information:

Melting points were determined using an X-4 model apparatus and were uncorrected.  $^1\text{H}$  NMR were recorded in  $\text{CDCl}_3$  or  $\text{DMSO-d}_6$  on a Varian Mercury 600 spectrometer and resonances were relative to TMS.  $^{13}\text{C}\{^1\text{H}\}$  NMR spectra were recorded in  $\text{CDCl}_3$  or  $\text{DMSO-d}_6$  on a Varian Mercury 600 (150 MHz) with complete proton decoupling spectrophotometers ( $\text{CDCl}_3$ : 77.0 ppm). HRMS was measured on an Agilent 6224 TOF LC/MS spectrometer. Sulfonium salt precursors **2** were prepared according to literature report.<sup>23</sup>

## 2. Experimental Procedures and Characterization Data

### General procedure for the preparation of quinolin-2(1H)-ones **7**

A mixture of sulfonium salt **2a** (0.201 g, 1 mmol), aldehydes **3** (1 mmol), amines **4** (1 mmol) and isocyanides **5** (1 mmol) was stirred in methanol (10 mL) at room temperature for 24-48 h. DBU (0.30 g, 2 mmol) was then added to the reaction system and the reaction mixture was stirred at 60 °C for 4-8 h. The solvent was removed under reduced pressure and the residue was purified by flash chromatography on silica gel (ethyl acetate/petroleum ether = 1 : 4 ~ 1 : 8, V/V) to give quinolin-2(1H)-ones **7**.

### N-(tert-Butyl)-2-(4-methoxyphenyl)-2-(4-methyl-3-(methylthio)-2-oxoquinolin-1(2H)-yl)acetamide (**7a**)

White solid (0.361 g, 85% yield); m.p. 165-166 °C;  $^1\text{H}$  NMR ( $\text{DMSO-d}_6$ , 600 MHz):  $\delta$  (ppm) 7.81 (d,  $J$  = 7.8 Hz, 1H, Ar-H), 7.41-6.85 (m, 9H, Ar-H, CH and NH), 3.70 (s, 3H,  $\text{OCH}_3$ ), 2.77 (s, 3H,  $\text{CH}_3$ ), 2.43 (s, 3H,  $\text{SCH}_3$ ), 1.27 (s, 9H,  $3\text{CH}_3$ );  $^{13}\text{C}\{^1\text{H}\}$  NMR ( $\text{DMSO-d}_6$ , 150 MHz):  $\delta$  (ppm) 166.7, 159.9, 158.3, 148.9, 137.9, 129.2, 129.0, 128.2, 127.2, 125.9, 122.0, 120.9, 117.5, 113.8, 60.6, 55.0, 50.8, 28.4, 18.0, 16.7. HRMS (ESI-TOF)  $m/z$   $[\text{M}+\text{Na}]^+$  Calcd for  $[\text{C}_{24}\text{H}_{28}\text{N}_2\text{O}_3\text{S}+\text{Na}]^+$ : 447.1713, Found: 447.1715.

### N-Butyl-2-(4-methyl-3-(methylthio)-2-oxoquinolin-1(2H)-yl)-2-(4-nitrophenyl)acetamide (**7b**)

White solid (0.285 g, 65% yield); m.p. 134-135 °C;  $^1\text{H}$  NMR ( $\text{DMSO-d}_6$ , 600 MHz):  $\delta$  (ppm) 8.17 (d,  $J$  = 7.8 Hz, 2H, Ar-H), 7.98-7.06 (m, 8H, Ar-H, CH and NH), 3.13-2.96 (m, 2H,  $\text{NCH}_2$ ), 2.80 (s, 3H,  $\text{CH}_3$ ), 2.42 (s, 3H,  $\text{SCH}_3$ ), 1.30-1.08 (m, 4H,  $2\text{CH}_2$ ), 0.77 (t,  $J$  = 7.2 Hz, 3H,  $\text{CH}_3$ );  $^{13}\text{C}\{^1\text{H}\}$  NMR ( $\text{DMSO-d}_6$ , 150 MHz):  $\delta$  (ppm) 166.3, 159.6, 149.1, 146.6, 143.0, 137.6, 130.0, 129.8, 127.6, 126.5, 123.0, 122.6, 121.2, 115.8, 59.4, 38.9, 31.0, 19.5, 18.0, 16.6, 13.7. HRMS (ESI-TOF)  $m/z$   $[\text{M}+\text{Na}]^+$  Calcd for  $[\text{C}_{23}\text{H}_{25}\text{N}_3\text{O}_4\text{S}+\text{Na}]^+$ : 462.1458, Found: 462.1463.

### N-Butyl-2-(4-methoxyphenyl)-2-(4-methyl-3-(methylthio)-2-oxoquinolin-1(2H)-yl)acetamide (**7c**)

White solid (0.323 g, 76% yield); m.p. 160-161 °C;  $^1\text{H}$  NMR ( $\text{CDCl}_3$ , 600 MHz):  $\delta$  (ppm) 7.76 (d,  $J$  = 8.4

Hz, 1H, Ar-H), 7.37-7.20 (m, 5H, Ar-H), 6.85 (d,  $J = 9.0$  Hz, 2H, Ar-H), 6.55 (br, 1H, NH), 6.13 (s, 1H, CH), 3.78 (s, 3H, OCH<sub>3</sub>), 3.29-3.22 (m, 2H, NCH<sub>2</sub>), 2.83 (s, 3H, CH<sub>3</sub>), 2.45 (s, 3H, SCH<sub>3</sub>), 1.45-1.23 (m, 4H, 2CH<sub>2</sub>), 0.86 (t,  $J = 7.2$  Hz, 3H, CH<sub>3</sub>); <sup>13</sup>C {<sup>1</sup>H} NMR (CDCl<sub>3</sub>, 150 MHz):  $\delta$  (ppm) 168.3, 161.0, 159.1, 149.8, 138.1, 130.0, 129.3, 128.3, 126.4, 126.0, 122.5, 121.6, 116.0, 114.1, 62.3, 55.2, 39.6, 31.2, 19.9, 18.1, 17.0, 13.7. HRMS (ESI-TOF)  $m/z$  [M+Na]<sup>+</sup> Calcd for [C<sub>24</sub>H<sub>28</sub>N<sub>2</sub>O<sub>3</sub>SNa]<sup>+</sup>: 447.1713, Found: 447.1716.

**2-(6-Bromo-4-methyl-3-(methylthio)-2-oxoquinolin-1(2H)-yl)-N-(tert-butyl)-2-(4-methoxyphenyl)acetamide (7d)**

Light yellow solid (0.402 g, 80% yield); m.p. 179-180 °C; <sup>1</sup>H NMR (CDCl<sub>3</sub>, 600 MHz):  $\delta$  (ppm) 7.85 (s, 1H, Ar-H), 7.41-7.28 (m, 4H, Ar-H), 6.86 (d,  $J = 7.2$  Hz, 2H, Ar-H), 6.46 (br, 1H, NH), 5.88 (s, 1H, CH), 3.78 (s, 3H, OCH<sub>3</sub>), 2.78 (s, 3H, CH<sub>3</sub>), 2.47 (s, 3H, SCH<sub>3</sub>), 1.31 (s, 9H, 3CH<sub>3</sub>); <sup>13</sup>C {<sup>1</sup>H} NMR (CDCl<sub>3</sub>, 150 MHz):  $\delta$  (ppm) 167.2, 160.6, 159.2, 148.2, 137.1, 132.4, 129.8, 129.3, 128.3, 126.2, 123.2, 118.0, 115.5, 114.2, 62.8, 55.2, 51.7, 28.4, 18.1, 17.0. HRMS (ESI-TOF)  $m/z$  [M+Na]<sup>+</sup> Calcd for [C<sub>24</sub>H<sub>27</sub>BrN<sub>2</sub>O<sub>3</sub>S+Na]<sup>+</sup>: 525.0818, Found: 525.0816.

**2-(6-Bromo-4-methyl-3-(methylthio)-2-oxoquinolin-1(2H)-yl)-N-butyl-2-(4-methoxyphenyl)acetamide (7e)**

White solid (0.417 g, 83% yield); m.p. 179-180 °C; <sup>1</sup>H NMR (CDCl<sub>3</sub>, 600 MHz):  $\delta$  (ppm) 7.85 (s, 1H, Ar-H), 7.41-7.28 (m, 4H, Ar-H), 6.86 (d,  $J = 6.6$  Hz, 2H, Ar-H), 6.56 (br, 1H, NH), 6.11 (s, 1H, CH), 3.79 (s, 3H, OCH<sub>3</sub>), 3.30-3.23 (m, 2H, NCH<sub>2</sub>), 2.79 (s, 3H, CH<sub>3</sub>), 2.47 (s, 3H, SCH<sub>3</sub>), 1.46-1.24 (m, 4H, 2CH<sub>2</sub>), 0.87 (t,  $J = 8.4$  Hz, 3H, CH<sub>3</sub>); <sup>13</sup>C {<sup>1</sup>H} NMR (CDCl<sub>3</sub>, 150 MHz):  $\delta$  (ppm) 168.0, 160.7, 159.2, 148.4, 136.9, 132.4, 129.7, 129.2, 128.2, 126.0, 123.3, 118.1, 115.6, 114.2, 61.8, 55.2, 39.6, 31.2, 19.9, 18.1, 17.0, 13.7. HRMS (ESI-TOF)  $m/z$  [M+H]<sup>+</sup> Calcd for [C<sub>24</sub>H<sub>28</sub>BrN<sub>2</sub>O<sub>3</sub>S]<sup>+</sup>: 525.0818, Found: 525.0816.

**N-Cyclohexyl-2-(4-methyl-3-(methylthio)-2-oxoquinolin-1(2H)-yl)-2-(4-(trifluoromethyl)phenyl)acetamide (7f)**

White solid (0.328 g, 73% yield); m.p. 195-196 °C; <sup>1</sup>H NMR (CDCl<sub>3</sub>, 600 MHz):  $\delta$  (ppm) 7.86 (d,  $J = 7.8$  Hz, 1H, Ar-H), 7.42-7.28 (m, 5H, Ar-H), 6.86 (d,  $J = 8.4$  Hz, 2H, Ar-H), 6.55 (s, 1H, NH), 5.97 (s, 1H, CH), 3.87-3.73 (m, 4H, OCH<sub>3</sub> and NCH), 2.80 (s, 3H, CH<sub>3</sub>), 2.48 (s, 3H, SCH<sub>3</sub>), 2.00-1.02 (m, 10H, 5CH<sub>2</sub>); <sup>13</sup>C {<sup>1</sup>H} NMR (CDCl<sub>3</sub>, 150 MHz):  $\delta$  (ppm) 167.1, 160.7, 159.2, 148.4, 137.0, 132.5, 129.8, 129.2, 128.3, 126.1, 123.3, 118.1, 115.6, 114.2, 62.0, 55.2, 48.6, 32.6, 32.5, 25.4, 24.6, 18.2, 17.1; HRMS (ESI-TOF)  $m/z$  [M+H]<sup>+</sup> Calcd for [C<sub>26</sub>H<sub>28</sub>F<sub>3</sub>N<sub>2</sub>O<sub>2</sub>S+Na]<sup>+</sup>: 551.0974, Found: 551.0979.

**N-(tert-Butyl)-2-(4-methyl-3-(methylthio)-2-oxoquinolin-1(2H)-yl)-2-(4-(trifluoromethyl)phenyl)acetamide (7g)**

**mide (7g)**

White solid (0.327 g, 71% yield); m.p. 167-168 °C; <sup>1</sup>H NMR (CDCl<sub>3</sub>, 600 MHz): δ (ppm) 7.82 (d, *J* = 7.8 Hz, 1H, Ar-H), 7.56 (d, *J* = 7.8 Hz, 2H, Ar-H), 7.41-7.25 (m, 5H, Ar-H), 6.88 (br, 1H, NH), 6.12 (s, 1H, CH), 2.88 (s, 3H, CH<sub>3</sub>), 2.45 (s, 3H, SCH<sub>3</sub>), 1.29 (s, 9H, CH<sub>3</sub>); <sup>13</sup>C {<sup>1</sup>H} NMR (CDCl<sub>3</sub>, 150 MHz): δ (ppm) 166.8, 161.1, 150.6, 138.4, 137.6, 130.3, 129.8, 129.6, 128.1, 128.0, 126.2, 125.3, 125.2, 124.8, 123.0, 121.6, 116.6, 61.7, 51.8, 28.4, 18.3, 17.2. HRMS (ESI-TOF) *m/z* [M+Na]<sup>+</sup> Calcd for [C<sub>24</sub>H<sub>25</sub>F<sub>3</sub>N<sub>2</sub>O<sub>2</sub>S+Na]<sup>+</sup>: 485.1481, Found: 485.1486.

**N-Butyl-2-(4-methyl-3-(methylthio)-2-oxoquinolin-1(2H)-yl)-2-(4-(trifluoromethyl)phenyl)acetamide (7h)**

Light yellow solid (0.324 g, 70% yield); m.p. 122-123 °C; <sup>1</sup>H NMR (CDCl<sub>3</sub>, 600 MHz): δ (ppm) 7.74 (d, *J* = 8.4 Hz, 1H, Ar-H), 7.48 (d, *J* = 7.8 Hz, 2H, Ar-H), 7.35-7.17 (m, 5H, Ar-H), 6.96 (br, 1H, NH), 6.36 (s, 1H, CH), 3.19-3.16 (m, 2H, NCH<sub>2</sub>), 2.79 (s, 3H, CH<sub>3</sub>), 2.36 (s, 3H, SCH<sub>3</sub>), 1.36-1.10 (m, 4H, 2CH<sub>2</sub>), 0.75 (t, *J* = 7.8 Hz, 3H, CH<sub>3</sub>); <sup>13</sup>C {<sup>1</sup>H} NMR (CDCl<sub>3</sub>, 150 MHz): δ (ppm) 167.5, 161.2, 150.7, 138.3, 137.4, 130.3, 129.8, 129.6, 128.0, 127.9, 126.2, 125.4, 125.3, 124.7, 123.1, 123.0, 121.7, 116.8, 60.3, 39.6, 31.2, 19.9, 18.3, 17.2, 13.6. HRMS (ESI-TOF) *m/z* [M+Na]<sup>+</sup> Calcd for [C<sub>24</sub>H<sub>25</sub>F<sub>3</sub>N<sub>2</sub>O<sub>2</sub>S+Na]<sup>+</sup>: 485.1481, Found: 485.1482.

**N-Cyclohexyl-2-(4-methyl-3-(methylthio)-2-oxoquinolin-1(2H)-yl)-2-(4-(trifluoromethyl)phenyl)acetamide (7i)**

White solid (0.331 g, 68% yield); m.p. 182-183 °C; <sup>1</sup>H NMR (CDCl<sub>3</sub>, 600 MHz): δ (ppm) 7.82 (d, *J* = 7.8 Hz, 1H, Ar-H), 7.55 (d, *J* = 7.8 Hz, 2H, Ar-H), 7.41-7.25 (m, 5H, Ar-H), 6.98 (br, 1H, NH), 6.23 (s, 1H, CH), 3.81-3.78 (m, 1H, NCH), 2.88 (s, 1H, CH<sub>3</sub>), 2.45 (s, 3H, SCH<sub>3</sub>), 1.94-0.87 (m, 10H, 5CH<sub>2</sub>); <sup>13</sup>C {<sup>1</sup>H} NMR (CDCl<sub>3</sub>, 150 MHz): δ (ppm) 166.6, 161.1, 150.7, 138.3, 137.4, 130.3, 129.8, 129.6, 128.0, 127.9, 126.2, 125.3, 123.0, 121.6, 116.8, 116.7, 103.8, 60.8, 48.7, 32.6, 32.4, 25.3, 24.6, 24.5, 18.3, 17.2. HRMS (ESI-TOF) *m/z* [M+Na]<sup>+</sup> Calcd for [C<sub>26</sub>H<sub>27</sub>F<sub>3</sub>N<sub>2</sub>O<sub>2</sub>S+Na]<sup>+</sup>: 511.1638, Found: 511.1637.

**N-(tert-Butyl)-2-(4-methyl-3-(methylthio)-2-oxoquinolin-1(2H)-yl)-2-(thiophen-2-yl)acetamide (7j)**

White solid (0.265 g, 66% yield); m.p. 108-109 °C; <sup>1</sup>H NMR (CDCl<sub>3</sub>, 600 MHz): δ (ppm) 7.77 (d, *J* = 7.8 Hz, 1H, Ar-H), 7.41-6.92 (m, 7H, Ar-H and NH), 5.84 (s, 1H, CH), 2.82 (s, 3H, CH<sub>3</sub>), 2.48 (s, 3H, SCH<sub>3</sub>), 1.29 (s, 9H, 3CH<sub>3</sub>); <sup>13</sup>C {<sup>1</sup>H} NMR (CDCl<sub>3</sub>, 150 MHz): δ (ppm) 166.7, 160.5, 150.1, 137.2, 136.4, 130.0, 127.9, 127.2, 126.3, 126.2, 126.1, 122.6, 121.6, 115.6, 58.0, 51.7, 28.3, 18.1, 17.1; HRMS (ESI-TOF) *m/z* [M+Na]<sup>+</sup> Calcd for [C<sub>21</sub>H<sub>24</sub>N<sub>2</sub>O<sub>2</sub>S<sub>2</sub>+Na]<sup>+</sup>: 423.1171, Found: 423.1177.

**2-(6-Bromo-4-methyl-3-(methylthio)-2-oxoquinolin-1(2H)-yl)-N-(tert-butyl)-2-(thiophen-2-yl)acetamide (7k)**

White solid (0.311 g, 65% yield); m.p. 178-179 °C; <sup>1</sup>H NMR (CDCl<sub>3</sub>, 600 MHz): δ (ppm) 7.86 (s, 1H, Ar-H), 7.46-9.94 (m, 6H, Ar-H and NH), 5.88 (s, 1H, CH), 2.78 (s, 3H, CH<sub>3</sub>), 2.50 (s, 3H, SCH<sub>3</sub>), 1.30 (s, 9H, 3CH<sub>3</sub>); <sup>13</sup>C {<sup>1</sup>H} NMR (CDCl<sub>3</sub>, 150 MHz): δ (ppm) 166.4, 160.2, 148.6, 136.2, 136.1, 132.5, 129.5, 128.5, 128.2, 127.4, 126.3, 123.2, 117.4, 115.7, 58.0, 51.9, 28.4, 18.1, 17.1. HRMS (ESI-TOF) *m/z* [M+Na]<sup>+</sup> Calcd for [C<sub>21</sub>H<sub>23</sub>BrN<sub>2</sub>O<sub>2</sub>S<sub>2</sub>+Na]<sup>+</sup>: 501.0277, Found: 501.0278.

**N-(tert-Butyl)-2-(4-methyl-3-(methylthio)-2-oxoquinolin-1(2H)-yl)-2-(p-tolyl)acetamide (7l)**

White solid (0.335 g, 82% yield); m.p. 129-130 °C; <sup>1</sup>H NMR (CDCl<sub>3</sub>, 600 MHz): δ (ppm) 7.76 (d, *J* = 7.8 Hz, 1H, Ar-H), 7.35-7.12 (m, 7H, Ar-H), 6.49 (br, 1H, NH), 5.92 (s, 1H, CH), 2.82 (s, 3H, CH<sub>3</sub>), 2.45 (s, 3H, SCH<sub>3</sub>), 2.31 (s, 3H, CH<sub>3</sub>), 1.30 (s, 9H, 3CH<sub>3</sub>); <sup>13</sup>C {<sup>1</sup>H} NMR (CDCl<sub>3</sub>, 150 MHz): δ (ppm) 167.5, 161.0, 149.6, 138.4, 137.7, 131.6, 129.9, 129.4, 128.4, 127.9, 125.9, 122.4, 121.6, 116.1, 63.2, 51.6, 28.4, 21.0, 18.1, 17.0. HRMS (ESI-TOF) *m/z* [M+Na]<sup>+</sup> Calcd for [C<sub>24</sub>H<sub>28</sub>N<sub>2</sub>O<sub>2</sub>S+Na]<sup>+</sup>: 431.1764, Found: 431.1771.

**N-Butyl-2-(4-methyl-3-(methylthio)-2-oxoquinolin-1(2H)-yl)-2-(p-tolyl)acetamide (7m)**

Light yellow solid (0.297 g, 73% yield); m.p. 137-138 °C; <sup>1</sup>H NMR (CDCl<sub>3</sub>, 600 MHz): δ (ppm) 7.68 (d, *J* = 8.4 Hz, 1H, Ar-H), 7.31-7.04 (m, 7H, Ar-H), 6.52 (br, 1H, NH), 6.10 (s, 1H, CH), 3.20-3.15 (m, 2H, NCH<sub>2</sub>), 2.75 (s, 3H, CH<sub>3</sub>), 2.37 (s, 3H, SCH<sub>3</sub>), 2.23 (s, 3H, CH<sub>3</sub>), 1.37-1.15 (m, 4H, 2CH<sub>2</sub>), 0.77 (t, *J* = 7.2 Hz, 3H); <sup>13</sup>C {<sup>1</sup>H} NMR (CDCl<sub>3</sub>, 150 MHz): δ (ppm) 168.2, 161.0, 149.8, 138.1, 137.7, 131.4, 130.0, 129.4, 128.3, 127.8, 125.9, 122.5, 121.6, 116.1, 62.4, 39.6, 31.2, 21.0, 19.9, 18.1, 17.0, 13.6. HRMS (ESI-TOF) *m/z* [M+Na]<sup>+</sup> Calcd for [C<sub>24</sub>H<sub>28</sub>N<sub>2</sub>O<sub>2</sub>S+Na]<sup>+</sup>: 431.1764, Found: 431.1768.

**N-(tert-Butyl)-2-(6-chloro-3-(methylthio)-2-oxo-4-phenylquinolin-1(2H)-yl)-2-(4-fluorophenyl)acetamide (7n)**

Light yellow solid (0.341 g, 67% yield); m.p. 191-192 °C; <sup>1</sup>H NMR (CDCl<sub>3</sub>, 600 MHz): δ (ppm) 7.55-7.08 (m, 12H, Ar-H), 6.60 (br, 1H, NH), 5.93 (s, 1H, CH), 2.33 (s, 3H, SCH<sub>3</sub>), 1.34 (s, 9H, 3CH<sub>3</sub>); <sup>13</sup>C {<sup>1</sup>H} NMR (CDCl<sub>3</sub>, 150 MHz): δ (ppm) 166.7, 162.3 (d, <sup>1</sup>*J*<sub>F-C</sub> = 247.4 Hz), 160.9, 151.3, 136.7, 136.1, 130.2, 130.0, 129.9, 129.8, 129.7, 129.0, 128.7, 128.6, 128.4, 128.1, 127.4, 123.1, 117.5, 116.0, 115.9, 62.6, 52.0, 28.4, 17.0. HRMS (ESI-TOF) *m/z* [M+Na]<sup>+</sup> Calcd for [C<sub>28</sub>H<sub>26</sub>ClFN<sub>2</sub>O<sub>2</sub>S+Na]<sup>+</sup>: 531.1280, Found: 531.1282.

**2-(4-Bromophenyl)-N-(tert-butyl)-2-(6-chloro-3-(methylthio)-2-oxo-4-phenylquinolin-1(2H)-yl)acetamide (7o)**

White solid (0.375 g, 66% yield); m.p. 142-143 °C; <sup>1</sup>H NMR (CDCl<sub>3</sub>, 600 MHz): δ (ppm) 7.57-7.25 (m, 11H, Ar-H), 7.08 (s, 1H, Ar-H), 6.65 (br, 1H, NH), 6.02 (s, 1H, CH), 2.33 (s, 3H, SCH<sub>3</sub>), 1.34 (s, 9H, 3CH<sub>3</sub>); <sup>13</sup>C {<sup>1</sup>H} NMR (CDCl<sub>3</sub>, 150 MHz): δ (ppm) 166.4, 160.9, 151.4, 136.5, 136.0, 133.3, 132.0, 129.8, 129.6, 129.0, 128.7, 128.6, 128.4, 128.2, 127.4, 123.0, 122.3, 117.7, 62.4, 52.0, 28.4, 17.1. HRMS (ESI-TOF) *m/z* [M+Na]<sup>+</sup> Calcd for [C<sub>28</sub>H<sub>26</sub>BrClN<sub>2</sub>O<sub>2</sub>S+Na]<sup>+</sup>: 591.0479, Found: 591.0470.

**N-(tert-Butyl)-2-(4-isopropyl-3-(methylthio)-2-oxoquinolin-1(2H)-yl)-2-(4-methoxyphenyl)acetamide (7p)**

White solid (0.317 g, 70% yield); m.p. 130-131 °C; <sup>1</sup>H NMR (CDCl<sub>3</sub>, 600 MHz): δ (ppm) 8.04 (d, *J* = 7.2 Hz, 1H, Ar-H), 7.39-6.87 (m, 7H, Ar-H), 6.27 (br, 1H, NH), 5.88 (s, 1H, CH), 4.57-4.42 (m, 1H, CH), 3.79 (s, 3H, OCH<sub>3</sub>), 2.43 (s, 3H, SCH<sub>3</sub>), 1.56 (d, *J* = 7.2 Hz, 6H, 2CH<sub>3</sub>), 1.31 (s, 9H, 3CH<sub>3</sub>); <sup>13</sup>C {<sup>1</sup>H} NMR (CDCl<sub>3</sub>, 150 MHz): δ (ppm) 167.7, 161.2, 159.2, 158.9, 139.1, 129.6, 128.3, 126.7, 121.7, 120.2, 116.0, 114.5, 114.2, 113.2, 64.1, 55.2, 51.6, 32.3, 28.4, 21.6, 17.3; HRMS (ESI-TOF) *m/z* [M+Na]<sup>+</sup> Calcd for [C<sub>26</sub>H<sub>32</sub>N<sub>2</sub>O<sub>3</sub>S+Na]<sup>+</sup>: 475.2026, Found: 475.2023.

**N-(tert-Butyl)-2-(4-methyl-3-(methylthio)-2-oxoquinolin-1(2H)-yl)-2-phenylacetamide (7q)**

White solid (0.268 g, 68% yield); m.p. 128-129 °C; <sup>1</sup>H NMR (CDCl<sub>3</sub>, 600 MHz): δ (ppm) 7.76 (d, *J* = 7.8 Hz, 1H, Ar-H), 7.36-7.19 (m, 8H, Ar-H), 6.60 (br, 1H, NH), 6.00 (s, 1H, CH), 2.83 (s, 3H, CH<sub>3</sub>), 2.45 (s, 3H, SCH<sub>3</sub>), 1.30 (s, 9H, 3CH<sub>3</sub>); <sup>13</sup>C {<sup>1</sup>H} NMR (CDCl<sub>3</sub>, 150 MHz): δ (ppm) 167.2, 160.9, 149.7, 138.1, 134.5, 129.9, 128.6, 128.2, 127.8, 127.7, 125.9, 122.5, 121.5, 116.1, 63.2, 51.5, 28.3, 18.1, 16.9. HRMS (ESI-TOF) *m/z* [M+Na]<sup>+</sup> Calcd for [C<sub>23</sub>H<sub>26</sub>N<sub>2</sub>O<sub>2</sub>S+Na]<sup>+</sup>: 417.1607, Found: 417.1610.

**N-(tert-Butyl)-2-(6-chloro-3-(methylthio)-2-oxo-4-phenylquinolin-1(2H)-yl)-2-(4-methoxyphenyl)acetamide (7r)**

Light yellow solid (0.395 g, 76% yield); m.p. 99-100 °C; <sup>1</sup>H NMR (CDCl<sub>3</sub>, 600 MHz): δ (ppm) 7.57-7.26 (m, 9H, Ar-H), 7.05 (s, 1H, Ar-H), 6.91 (d, *J* = 8.4 Hz, 2H, Ar-H), 6.44 (br, 1H, NH), 5.85 (s, 1H, CH), 3.81 (s, 3H, OCH<sub>3</sub>), 2.34 (s, 3H, SCH<sub>3</sub>), 1.34 (s, 9H, 3CH<sub>3</sub>); <sup>13</sup>C {<sup>1</sup>H} NMR (CDCl<sub>3</sub>, 150 MHz): δ (ppm) 167.2, 160.9, 159.4, 151.0, 137.1, 136.3, 130.3, 129.6, 129.5, 129.1, 128.7, 128.6, 128.5, 128.4, 127.8, 127.3, 126.3, 123.1, 114.4, 63.5, 55.3, 51.8, 28.4, 17.0; HRMS (ESI-TOF) *m/z* [M+Na]<sup>+</sup> Calcd for [C<sub>29</sub>H<sub>29</sub>ClN<sub>2</sub>O<sub>3</sub>S+Na]<sup>+</sup>: 543.1480, Found: 543.1476.

**N-(tert-Butyl)-2-(4-isopropyl-3-(methylthio)-2-oxoquinolin-1(2H)-yl)-2-(4-nitrophenyl)acetamide (7s)**

Light yellow solid (0.312 g, 67% yield); m.p. 153-154 °C; <sup>1</sup>H NMR (CDCl<sub>3</sub>, 600 MHz): δ (ppm) 8.16 (d, *J* = 7.8 Hz, 2H, Ar-H), 8.11 (d, *J* = 7.8 Hz, 1H, Ar-H), 7.46-7.24 (m, 5H, Ar-H), 6.85 (br, 1H, NH), 6.32 (s,

1H, CH), 4.56-4.46 (m, 1H, CH), 2.42 (s, 3H, SCH<sub>3</sub>), 1.61 (d, *J* = 7.2 Hz, 6H, 2CH<sub>3</sub>), 1.30 (s, 9H, 3CH<sub>3</sub>); <sup>13</sup>C {<sup>1</sup>H} NMR (CDCl<sub>3</sub>, 150 MHz): δ (ppm) 166.4, 161.3, 160.2, 147.1, 141.9, 137.9, 130.1, 128.4, 127.9, 126.8, 123.5, 122.5, 120.3, 116.9, 61.8, 51.9, 32.3, 28.4, 21.5, 17.6; HRMS (ESI-TOF) *m/z* [M+Na]<sup>+</sup> Calcd for [C<sub>25</sub>H<sub>29</sub>N<sub>3</sub>O<sub>4</sub>S+Na]<sup>+</sup>: 490.1771; Found: 490.1780.

**N-(tert-Butyl)-2-(4-chlorophenyl)-2-(4-methyl-3-(methylthio)-2-oxoquinolin-1(2H)-yl)acetamide (7t)**

White solid (0.322 g, 75% yield); m.p. 133-134 °C; <sup>1</sup>H NMR (CDCl<sub>3</sub>, 600 MHz): δ (ppm) 7.79 (d, *J* = 7.8 Hz, 1H, Ar-H), 7.37-7.23 (m, 7H, Ar-H), 6.67 (br, 1H, NH), 6.01 (s, 1H, CH), 2.85 (s, 3H, CH<sub>3</sub>), 2.45 (s, 3H, SCH<sub>3</sub>), 1.29 (s, 9H, 3CH<sub>3</sub>); <sup>13</sup>C {<sup>1</sup>H} NMR (CDCl<sub>3</sub>, 150 MHz): δ (ppm) 167.0, 161.0, 150.2, 137.8, 133.6, 133.0, 130.1, 129.2, 128.7, 128.2, 126.1, 122.8, 121.6, 116.3, 61.9, 51.7, 28.4, 18.2, 17.1. HRMS (ESI-TOF) *m/z* [M+Na]<sup>+</sup> Calcd for [C<sub>23</sub>H<sub>25</sub>ClN<sub>2</sub>O<sub>2</sub>S+Na]<sup>+</sup>: 451.1217; Found: 451.1223.

**N-(tert-Butyl)-2-(4-methyl-3-(methylthio)-2-oxoquinolin-1(2H)-yl)butanamide (7u)**

White solid (0.243 g, 70% yield); m.p. 116-117 °C; <sup>1</sup>H NMR (CDCl<sub>3</sub>, 600 MHz): δ (ppm) 7.80 (d, *J* = 7.8 Hz, 1H, Ar-H), 7.54-7.47 (m, 2H, Ar-H), 7.27 (t, *J* = 7.2 Hz, 1H, Ar-H), 6.10 (s, 1H, NH), 5.69 (s, 1H, CH), 2.84 (s, 3H, CH<sub>3</sub>), 2.47 (s, 3H, SCH<sub>3</sub>), 2.40-2.05 (m, 2H, CH<sub>2</sub>), 1.24 (s, 9H, 3CH<sub>3</sub>), 0.74 (t, *J* = 7.2 Hz, 3H, CH<sub>3</sub>); <sup>13</sup>C {<sup>1</sup>H} NMR (CDCl<sub>3</sub>, 150 MHz): δ (ppm) 169.6, 161.6, 149.8, 136.5, 130.0, 127.8, 126.1, 122.7, 121.6, 116.2, 58.3, 51.3, 28.4, 21.0, 18.2, 17.2, 10.7. HRMS (ESI-TOF) *m/z* [M+Na]<sup>+</sup> Calcd for [C<sub>19</sub>H<sub>26</sub>N<sub>2</sub>O<sub>2</sub>S+Na]<sup>+</sup>: 369.1607; Found: 369.1616.

**N-(tert-butyl)-2-(4-methyl-3-(methylthio)-2-oxoquinolin-1(2H)-yl)pentanamide (7v)**

White solid (0.258 g, 72% yield); m.p. 96-97 °C; <sup>1</sup>H NMR (CDCl<sub>3</sub>, 600 MHz): δ (ppm) 7.80 (d, *J* = 7.8 Hz, 1H, Ar-H), 7.53-7.26 (m, 3H, Ar-H), 6.17 (s, 1H, NH), 5.71 (s, 1H, CH), 2.83 (s, 3H, CH<sub>3</sub>), 2.47 (s, 3H, SCH<sub>3</sub>), 2.33-1.91 (m, 2H, CH<sub>2</sub>), 1.24 (s, 9H, 3CH<sub>3</sub>), 1.15-1.06 (m, 2H, CH<sub>2</sub>), 0.84 (t, *J* = 7.8 Hz, 3H, CH<sub>3</sub>); <sup>13</sup>C {<sup>1</sup>H} NMR (CDCl<sub>3</sub>, 150 MHz): δ (ppm) 169.7, 161.5, 149.8, 136.4, 130.0, 127.8, 126.1, 122.7, 121.6, 116.3, 56.8, 51.3, 29.8, 28.4, 19.7, 18.1, 17.2, 13.6; HRMS (ESI-TOF) *m/z* [M+Na]<sup>+</sup> Calcd for [C<sub>20</sub>H<sub>28</sub>N<sub>2</sub>O<sub>2</sub>S+Na]<sup>+</sup>: 383.1764; Found: 383.1772.

**General procedure for the preparation of oxireno[2,3-c]quinolin-2(1aH,3H,7bH)-ones 10**

A mixture of sulfonium salt **2b** (0.215 g, 1 mmol), aldehydes **3** (1 mmol), amines **4** (1 mmol) and isocyanides **5** (1 mmol) was stirred in methanol (10 mL) at room temperature for 24-48 h. DBU (0.30 g, 2 mmol) was then added to the reaction system and the reaction mixture was stirred at room temperature for 4-8 h. The solvent was removed under reduced pressure and the residue was purified by flash

chromatography on silica gel (ethyl acetate/petroleum ether = 1 : 4 ~ 1 : 8, V/V) to give oxireno[2,3-c]quinolin-2-(1aH,3H,7bH)-ones **10**.

**N-tert-Butyl-2-(4-chlorophenyl)-2-(1a,2-dihydro-1a,7b-dimethyl-2-oxooxireno[2,3-c]quinolin-3(7bH)-yl)acetamide (10a)**

Light yellow oil (0.239 g, 58% yield); **diastereomer 1**:  $^1\text{H}$  NMR ( $\text{CDCl}_3$ , 600 MHz):  $\delta$  (ppm) 7.72 (d,  $J = 7.8$  Hz, 1H, Ar-H), 7.29-7.25 (m, 5H, Ar-H), 7.15 (t,  $J = 7.2$  Hz, 1H, Ar-H), 6.96 (d,  $J = 7.8$  Hz, 1H, Ar-H), 6.23 (s, 1H, CH), 6.19 (s, 1H, NH), 1.95 (s, 3H,  $\text{CH}_3$ ), 1.77 (s, 3H,  $\text{CH}_3$ ), 1.20 (s, 9H,  $3\text{CH}_3$ );  $^{13}\text{C}$   $\{^1\text{H}\}$  NMR ( $\text{CDCl}_3$ , 150 MHz):  $\delta$  (ppm) 170.2, 167.1, 136.9, 133.3, 132.2, 129.9, 128.7, 128.3, 127.9, 123.7, 123.4, 117.1, 64.0, 62.0, 61.9, 51.6, 29.7, 28.3, 15.9, 13.5; **diastereomer 2**:  $^1\text{H}$  NMR ( $\text{CDCl}_3$ , 600 MHz):  $\delta$  (ppm) 7.67 (d,  $J = 7.8$  Hz, 1H, Ar-H), 7.30-7.26 (m, 4H, Ar-H), 7.18 (t,  $J = 7.2$  Hz, 1H, Ar-H), 7.09 (t,  $J = 7.2$  Hz, 1H, Ar-H), 6.99 (d,  $J = 7.8$  Hz, 1H, Ar-H), 6.24 (s, 1H, NH), 5.98 (s, 1H, CH), 1.96 (s, 3H,  $\text{CH}_3$ ), 1.82 (s, 3H,  $\text{CH}_3$ ), 1.31 (s, 9H,  $3\text{CH}_3$ );  $^{13}\text{C}$   $\{^1\text{H}\}$  NMR ( $\text{CDCl}_3$ , 150 MHz):  $\delta$  (ppm) 170.8, 166.6, 136.6, 133.4, 132.5, 129.6, 129.4, 128.5, 127.7, 123.8, 123.0, 117.7, 64.0, 60.6, 60.4, 51.7, 29.7, 28.5, 15.9, 13.8; HRMS (ESI-TOF)  $m/z$   $[\text{M}+\text{H}]^+$  Calcd for  $[\text{C}_{23}\text{H}_{26}\text{ClN}_2\text{O}_3]^+$ : 413.1626; Found: 413.1626.

**N-tert-Butyl-2-(4-bromophenyl)-2-(1a,2-dihydro-1a,7b-dimethyl-2-oxooxireno[2,3-c]quinolin-3(7bH)-yl)acetamide (10b)**

Light yellow oil (0.279 g, 61% yield);  $^1\text{H}$  NMR ( $\text{CDCl}_3$ , 600 MHz):  $\delta$  (ppm) 7.72 (d,  $J = 7.2$  Hz, 0.35H, Ar-H), 7.67 (d,  $J = 7.2$  Hz, 0.65H, Ar-H), 7.44-7.40 (m, 2H, Ar-H), 7.23-6.95 (m, 5H, Ar-H), 6.21 and 6.19 (ss, 1.33H, NH and 0.33CH), 5.99 (s, 0.67H, 0.67CH), 1.95 (s, 3H,  $\text{CH}_3$ ), 1.82 (s, 2H,  $2/3 \times \text{CH}_3$ ), 1.77 (s, 1H,  $1/3 \times \text{CH}_3$ ), 1.30 (s, 6H,  $2/3 \times 3\text{CH}_3$ ), 1.20 (s, 3H,  $1/3 \times 3\text{CH}_3$ );  $^{13}\text{C}$   $\{^1\text{H}\}$  NMR ( $\text{CDCl}_3$ , 150 MHz):  $\delta$  (ppm) 170.9, 170.3 (minor), 167.1 (minor), 166.5, 136.9, 136.6 (minor), 133.0, 132.8 (minor), 129.9, 129.7, 129.6 (minor), 129.1, 127.9 (minor), 127.7, 123.8 (minor), 123.4, 123.0, 121.6, 117.7 (minor), 117.1, 64.0, 63.8 (minor), 61.9, 60.4, 51.7, 51.6 (minor), 28.6, 28.3 (minor), 15.9, 13.8, 13.5 (minor); HRMS (ESI-TOF)  $m/z$   $[\text{M}+\text{H}]^+$  Calcd for  $[\text{C}_{23}\text{H}_{26}\text{BrN}_2\text{O}_3]^+$ : 457.1121; Found: 457.1120.

**N-tert-Butyl-2-(1a,2-dihydro-1a,7b-dimethyl-2-oxooxireno[2,3-c]quinolin-3(7bH)-yl)-2-(4-methoxyphenyl)acetamide (10c)**

Light yellow oil (0.319 g, 78% yield);  $^1\text{H}$  NMR ( $\text{CDCl}_3$ , 600 MHz):  $\delta$  (ppm) 7.71-7.64 (m, 1H, Ar-H), 7.29-7.03 (m, 5H, Ar-H), 6.85 (t,  $J = 7.8$  Hz, 2H, Ar-H), 6.20 and 6.13 (ss, 1.37H, NH and 0.37CH), 5.89 (s, 0.63H, 0.63CH), 3.78 and 3.77 (ss, 3H,  $\text{OCH}_3$ ), 1.93 (s, 3H,  $\text{CH}_3$ ), 1.81 and 1.76 (s, 3H,  $\text{CH}_3$ ), 1.31 and 1.23 (ss, 9H,  $3\text{CH}_3$ );  $^{13}\text{C}$   $\{^1\text{H}\}$  NMR ( $\text{CDCl}_3$ , 150 MHz):  $\delta$  (ppm) 170.5, 170.0 (minor), 167.9 (minor),



167.1, 158.9, 137.4 (minor), 137.1, 129.8 (minor), 129.3, 128.6, 127.7 (minor), 127.6, 126.2, 125.8 (minor), 123.8, 123.1 (minor), 122.6, 117.5 (minor), 117.0, 113.9, 113.8 (minor), 63.7, 62.7, 61.4, 55.2, 51.6, 51.4 (minor), 28.6, 28.3 (minor), 15.9, 13.9, 13.6 (minor); HRMS (ESI-TOF)  $m/z$   $[M+H]^+$  Calcd for  $[C_{24}H_{29}N_2O_4]^+$ : 409.2122; Found: 409.2120.

**2-(4-Chlorophenyl)-N-cyclohexyl-2-(1a,2-dihydro-1a,7b-dimethyl-2-oxooxireno[2,3-c]quinolin-3(7bH)-yl)acetamide (10d)**

Light yellow oil (0.289 g, 66% yield);  $^1H$  NMR ( $CDCl_3$ , 600 MHz):  $\delta$  (ppm) 7.71 (d,  $J = 7.8$  Hz, 0.48H, Ar-H), 7.66 (d,  $J = 7.8$  Hz, 0.52H, Ar-H), 7.32-7.25 (m, 4H, Ar-H), 7.18-6.96 (m, 3H, Ar-H), 6.29 (s, 1.48H, NH and 0.48CH), 6.02 (s, 0.52H, 0.52CH), 3.81-3.77 (m, 1H, NCH), 1.95-0.88 (m, 16H, 2CH<sub>3</sub> and 5CH<sub>2</sub>);  $^{13}C$   $\{^1H\}$  NMR ( $CDCl_3$ , 150 MHz):  $\delta$  (ppm) 170.9, 170.3 (minor), 167.1 (minor), 166.5, 136.9, 136.4 (minor), 133.4, 132.5 (minor), 132.3, 129.9, 129.5 (minor), 129.4, 128.7 (minor), 128.6, 128.5 (minor), 127.9 (minor), 127.7, 123.9, 123.4 (minor), 123.0, 117.7 (minor), 116.9, 63.9 (minor), 63.8, 61.4, 60.0, 48.6 (minor), 48.3, 32.8 (minor), 32.6, 32.4 (minor), 32.2, 25.4 (minor), 24.6, 24.3, 24.2 (minor), 15.8, 13.8, 13.6 (minor); HRMS (ESI-TOF)  $m/z$   $[M+H]^+$  Calcd for  $[C_{25}H_{28}ClN_2O_3]^+$ : 439.1783; Found: 439.1782.

**N-cyclohexyl-2-(1a,2-dihydro-1a,7b-dimethyl-2-oxooxireno[2,3-c]quinolin-3(7bH)-yl)-2-(4-nitrophenyl)acetamide (10e)**

Yellow oil (0.229 g, 51% yield);  $^1H$  NMR ( $CDCl_3$ , 600 MHz):  $\delta$  (ppm) 8.53-8.12 (m, 3H, Ar-H), 7.75-6.85 (m, 5H, Ar-H), 6.52-6.19 (m, 2H, NH and CH), 3.80-3.77 (m, 1H, NCH), 1.98-0.86 (m, 16H, 2CH<sub>3</sub> and 5CH<sub>2</sub>);  $^{13}C$   $\{^1H\}$  NMR ( $CDCl_3$ , 150 MHz):  $\delta$  (ppm) 170.5, 169.1 (minor), 166.3, 165.9 (minor), 147.1, 141.2, 136.4, 136.0 (minor), 132.3 (minor), 130.0, 129.8 (minor), 128.9, 128.3, 128.1 (minor), 127.7 (minor), 123.8 (minor), 123.7, 123.3, 122.7 (minor), 117.6 (minor), 116.9, 115.6, 64.2, 63.8 (minor), 61.1, 59.3, 48.8, 48.5 (minor), 32.7 (minor), 32.6, 32.4, 32.1 (minor), 25.4 (minor), 24.7, 24.3, 24.1 (minor), 15.9, 15.5 (minor), 13.8 (minor), 13.5; HRMS (ESI-TOF)  $m/z$   $[M+H]^+$  Calcd for  $[C_{25}H_{28}N_3O_5]^+$ : 450.2023; Found: 439.2020.

**N-tert-Butyl-2-(6-bromo-1a,2-dihydro-1a,7b-dimethyl-2-oxooxireno[2,3-c]quinolin-3(7bH)-yl)-2-(4-nitrophenyl)acetamide (10f)**

Yellow oil (0.271 g, 54% yield);  $^1H$  NMR ( $CDCl_3$ , 600 MHz):  $\delta$  (ppm) 8.17 and 8.13 (dd,  $J = 8.4$  Hz, 2H, Ar-H), 7.84 and 7.78 (ss, 1H, Ar-H), 7.50-7.24 (m, 4H, Ar-H), 6.87 and 6.76 (dd,  $J = 7.8$  Hz, 1H, Ar-H), 6.43 and 6.35 (ss, 1H, CH), 6.20 and 6.12 (ss, 1H, NH), 1.96 (s, 3H, CH<sub>3</sub>), 1.84 and 1.79 (ss, 3H, CH<sub>3</sub>), 1.33 (s, 4.5H, 1/2×3CH<sub>3</sub>), 1.22 (s, 4.5H, 1/2×3CH<sub>3</sub>);  $^{13}C$   $\{^1H\}$  NMR ( $CDCl_3$ , 150 MHz):  $\delta$  (ppm) 171.1,

170.1, 166.0, 165.8, 147.1, 147.0, 140.8, 140.5, 132.7, 132.4, 131.1, 130.8, 128.8, 128.3, 126.1, 126.0, 123.4, 118.6, 116.6, 116.3, 64.0, 63.7, 63.5, 52.0, 51.9, 28.5, 28.3, 15.8, 13.8, 13.5; HRMS (ESI-TOF)  $m/z$   $[M+H]^+$  Calcd for  $[C_{23}H_{25}BrN_3O_5]^+$ : 502.0972; Found: 502.0973.

**N-tert-Butyl-2-(6-chloro-1a,2-dihydro-1a-methyl-2-oxo-7b-phenyloxireno[2,3-c]quinolin-3(7bH)-yl)-2-(4-chlorophenyl)acetamide (10g)**

Light yellow oil (0.280 g, 55% yield);  $^1H$  NMR ( $CDCl_3$ , 600 MHz):  $\delta$  (ppm) 7.61 (t,  $J = 7.2$  Hz, 1H, Ar-H), 7.54 (t,  $J = 7.8$  Hz, 1H, Ar-H), 7.50-6.96 (m, 10H, Ar-H), 6.39 (s, 0.65H, 0.65NH), 6.28 (s, 0.35H, 0.35NH), 6.11 and 6.06 (ss, 1H, CH), 1.40 and 1.37 (ss, 3H,  $CH_3$ ), 1.36 and 1.27 (ss, 9H,  $3CH_3$ );  $^{13}C$   $\{^1H\}$  NMR ( $CDCl_3$ , 150 MHz):  $\delta$  (ppm) 170.0, 169.1 (minor), 166.8 (minor), 166.4, 136.1 (minor), 135.6, 133.7, 133.4, 133.3 (minor), 132.3, 131.9 (minor), 130.6 (minor), 130.3, 129.8 (minor), 129.3 (minor), 129.2, 129.0, 128.8, 128.6, 128.4, 128.1 (minor), 128.0, 125.9, 119.5, 118.3, 68.7, 64.8, 61.9 (minor), 60.5, 52.0, 51.8 (minor), 29.7 (minor), 28.6, 28.4 (minor), 14.8, 14.5 (minor); HRMS (ESI-TOF)  $m/z$   $[M+H]^+$  Calcd for  $[C_{28}H_{27}Cl_2N_2O_3]^+$ : 509.1393; Found: 509.1394.

**N-tert-Butyl-2-(1a,2-dihydro-1a-methyl-2-oxo-7b-phenyloxireno[2,3-c]quinolin-3(7bH)-yl)-2-(4-methoxyphenyl)acetamide (10h)**

Light yellow oil (0.267 g, 57% yield);  $^1H$  NMR ( $CDCl_3$ , 600 MHz):  $\delta$  (ppm) 7.63 (t,  $J = 7.8$  Hz, 1H, Ar-H), 7.51 (t,  $J = 7.2$  Hz, 1H, Ar-H), 7.44-6.87 (m, 11H, Ar-H), 6.26 and 6.17 (ss, 1.38H, NH and 0.38CH), 5.88 (s, 0.62H, 0.62CH), 3.79 and 3.78 (ss, 3H,  $OCH_3$ ), 1.40-1.28 (m, 12H,  $4CH_3$ );  $^{13}C$   $\{^1H\}$  NMR ( $CDCl_3$ , 150 MHz):  $\delta$  (ppm) 169.7, 169.2 (minor), 167.8 (minor), 167.1, 159.0, 138.1, 137.7 (minor), 134.5, 134.3 (minor), 130.8 (minor), 130.6, 129.9, 129.3, 128.7, 128.5, 128.0, 126.3, 125.9 (minor), 124.0, 122.8 (minor), 122.3, 117.3 (minor), 116.6, 114.1, 113.9 (minor), 69.1, 64.6, 62.8 (minor), 61.6, 55.2, 51.7, 51.5 (minor), 29.6 (minor), 28.6, 28.4 (minor), 14.8, 14.5 (minor); HRMS (ESI-TOF)  $m/z$   $[M+H]^+$  Calcd for  $[C_{29}H_{31}N_2O_4]^+$ : 471.2278; Found: 471.2278.

**N-tert-Butyl-2-(1a,2-dihydro-1a,7b-dimethyl-2-oxooxireno[2,3-c]quinolin-3(7bH)-yl)pentanamide (10i)**

Light yellow oil (0.224 g, 65% yield);  $^1H$  NMR ( $CDCl_3$ , 600 MHz):  $\delta$  (ppm) 8.85 (s, 0.6H, 0.6NH), 7.78-6.65 (m, 4H, Ar-H), 5.95 (s, 0.4H, 0.4NH), 5.23 (d,  $J = 6.0$  Hz, 0.6H, 0.6CH), 3.91 (s, 0.4H, 0.4CH), 2.59-0.65 (m, 22H,  $2CH_2$  and  $6CH_3$ );  $^{13}C$   $\{^1H\}$  NMR ( $CDCl_3$ , 150 MHz):  $\delta$  (ppm) 172.0 (minor), 171.3, 169.5 (minor), 169.0, 156.1 (minor), 150.0, 135.2 (minor), 132.6, 132.1 (minor), 129.6, 127.8 (minor), 122.9, 121.3, 118.4 (minor), 116.2, 113.1 (minor), 53.4, 51.2, 51.1, 50.8, 35.8, 30.7 (minor), 28.8, 28.5

(minor), 28.3, 28.1 (minor), 18.9, 15.7, 13.8, 13.2 (minor); HRMS (ESI-TOF)  $m/z$   $[M+H]^+$  Calcd for  $[C_{20}H_{29}N_2O_3]^+$ : 345.2173; Found: 345.2178.

**N-tert-Butyl-2-(1a,2-dihydro-1a,7b-dimethyl-2-oxooxireno[2,3-c]quinolin-3(7bH)-yl)butanamide (10j)**

Light yellow oil (0.204 g, 62% yield);  $^1H$  NMR ( $CDCl_3$ , 600 MHz):  $\delta$  (ppm) 8.89 (s, 0.57H, 0.57NH), 7.79-6.64 (m, 4H, Ar-H), 5.95 (s, 0.43H, 0.43NH), 5.24 (s, 0.57H, 0.57CH), 3.85 (dd,  $J_1 = 8.4$  Hz,  $J_2 = 4.8$  Hz, 0.43H, 0.43CH), 2.61-0.80 (m, 20H,  $CH_2$  and 6 $CH_3$ );  $^{13}C$   $\{^1H\}$  NMR ( $CDCl_3$ , 150 MHz):  $\delta$  (ppm) 171.7, 169.6, 155.8 (minor), 150.0, 135.1, 132.6 (minor), 132.2 (minor), 129.5, 127.8, 124.0 (minor), 122.9, 121.2 (minor), 116.2, 113.1 (minor), 63.8, 63.4, 55.1, 51.1 (minor), 50.9, 30.6 (minor), 29.7 (minor), 28.8, 28.5, 28.3, 28.1 (minor), 27.0, 21.5 (minor), 16.0 (minor), 15.7, 13.9, 11.4 (minor), 10.2; HRMS (ESI-TOF)  $m/z$   $[M+H]^+$  Calcd for  $[C_{19}H_{27}N_2O_3]^+$ : 331.2016, found: 331.2016.

**N-Butyl-2-(1a,2-dihydro-1a,7b-dimethyl-2-oxooxireno[2,3-c]quinolin-3(7bH)-yl)-2-(4-methoxyphenyl)acetamide (10k)**

Light yellow oil (0.310 g, 76% yield);  $^1H$  NMR ( $CDCl_3$ , 600 MHz):  $\delta$  (ppm) 7.70 (d,  $J = 7.8$  Hz, 0.35H, Ar-H), 7.65 (d,  $J = 7.2$  Hz, 0.65H, Ar-H), 7.32-7.03 (m, 5H, Ar-H), 6.85 (t,  $J = 8.4$  Hz, 2H, Ar-H), 6.37 (s, 0.35H, 0.35NH), 6.26 (s, 0.65H, 0.65NH), 6.13 (s, 0.65H, 0.65CH), 6.05 (s, 0.65H, 0.65CH), 3.78 and 3.77 (ss, 3H,  $OCH_3$ ), 3.34-3.13 (m, 2H,  $NCH_2$ ), 1.93 (s, 3H,  $CH_3$ ), 1.81 and 1.76 (ss, 3H,  $CH_3$ ), 1.44-0.82 (m, 7H,  $CH_2CH_2CH_3$ );  $^{13}C$   $\{^1H\}$  NMR ( $CDCl_3$ , 150 MHz):  $\delta$  (ppm) 170.6, 169.8 (minor), 168.8 (minor), 168.0, 158.9, 137.4 (minor), 136.8, 129.9 (minor), 129.4, 129.2, 128.6 (minor), 127.8 (minor), 127.6, 126.0, 125.8 (minor), 123.9, 123.1 (minor), 122.7, 117.5 (minor), 116.4, 114.0, 113.9 (minor), 63.7 (minor), 63.6, 62.5, 60.6, 55.2, 39.5, 31.4, 31.2 (minor), 20.0, 19.8 (minor), 15.9, 13.9 (minor), 13.7, 13.6; HRMS (ESI-TOF)  $m/z$   $[M+H]^+$  Calcd for  $[C_{24}H_{29}N_2O_4]^+$ : 409.2122; Found: 409.2121.

**N-tert-Butyl-2-(7b-ethyl-1a,2-dihydro-1a-methyl-2-oxooxireno[2,3-c]quinolin-3(7bH)-yl)-2-(4-methoxyphenyl)acetamide (10l)**

Light yellow oil (0.245 g, 58% yield);  $^1H$  NMR ( $CDCl_3$ , 600 MHz):  $\delta$  (ppm) 7.61-6.83 (m, 8H, Ar-H), 6.21 (s, 0.65H, 0.65NH), 6.12 (s, 0.35H, 0.35NH), 5.99 (s, 0.35H, 0.35CH), 5.91 (s, 0.65H, 0.65CH), 3.78 and 3.77 (ss, 3H,  $OCH_3$ ), 2.73-2.67 (m, 1H,  $CH_2^a$ ), 1.83-1.77 (m, 4H,  $CH_2^a$  and  $CH_3$ ), 1.33 (s, 6H,  $2/3 \times 3CH_3$ ), 1.23 (s, 3H,  $1/3 \times 3CH_3$ ), 1.19-1.06 (m, 3H,  $CH_3$ );  $^{13}C$   $\{^1H\}$  NMR ( $CDCl_3$ , 150 MHz):  $\delta$  (ppm) 170.2, 169.4 (minor), 167.4 (minor), 167.0, 159.0, 136.6 (minor), 136.2, 129.4 (minor), 129.1, 129.0, 128.7, 128.5 (minor), 128.0 (minor), 127.7, 125.8, 125.3 (minor), 123.6, 119.7 (minor), 118.6, 114.1, 113.9 (minor), 66.5,

63.3, 62.3 (minor), 61.3, 55.2, 51.7, 51.6 (minor), 29.4 (minor), 28.6, 28.3 (minor), 22.9, 22.8 (minor), 13.5, 13.2 (minor), 10.1; HRMS (ESI-TOF)  $m/z$   $[M+H]^+$  Calcd for  $[C_{25}H_{31}N_2O_4]^+$ : 423.2278; Found: 423.2274.

### 3. Copies of $^1\text{H}$ and $^{13}\text{C}$ NMR spectrum of compound 7a-v, 10a-l

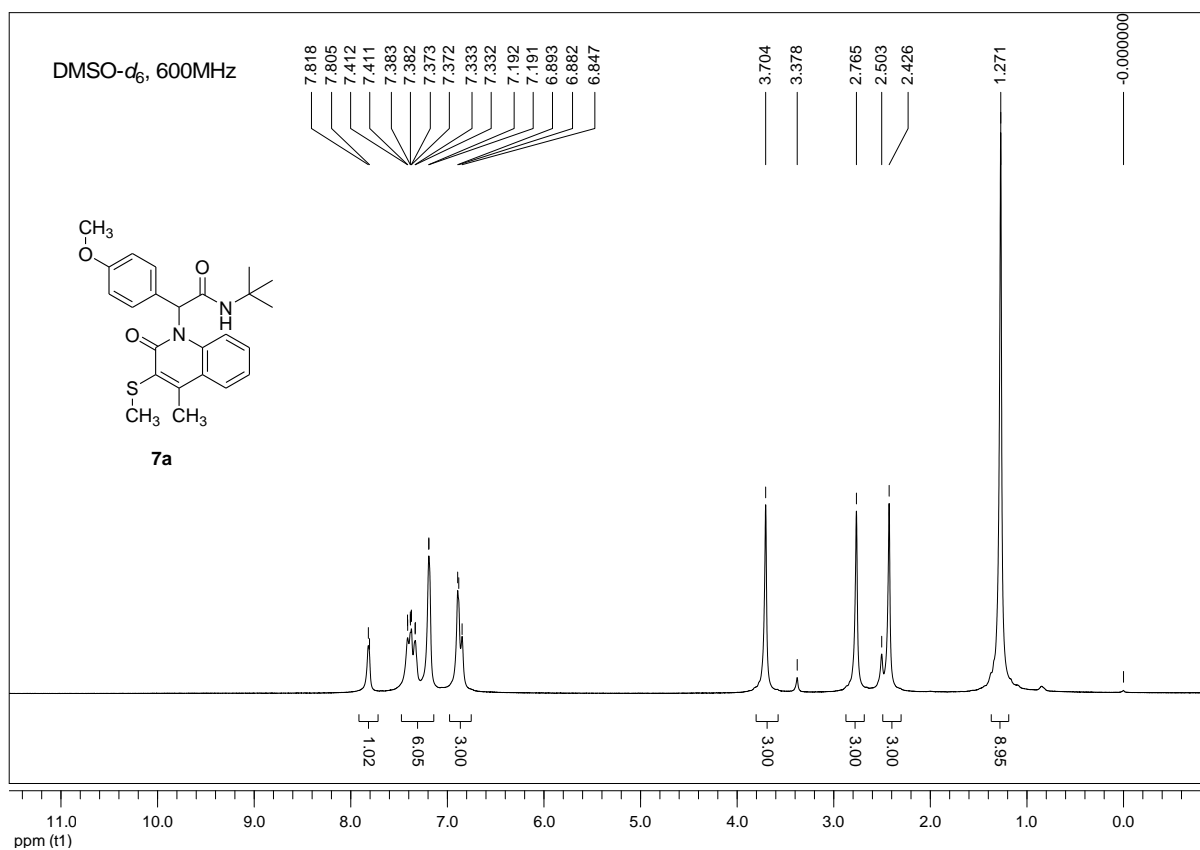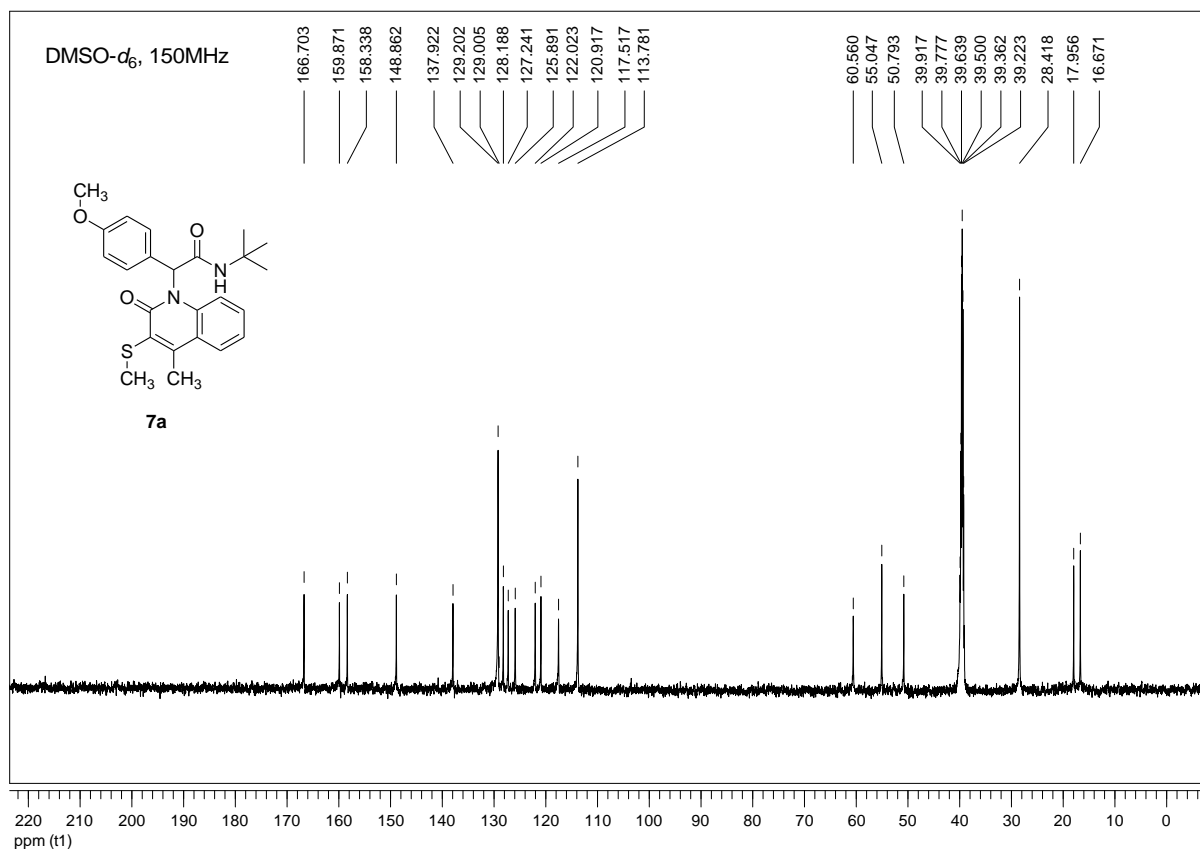

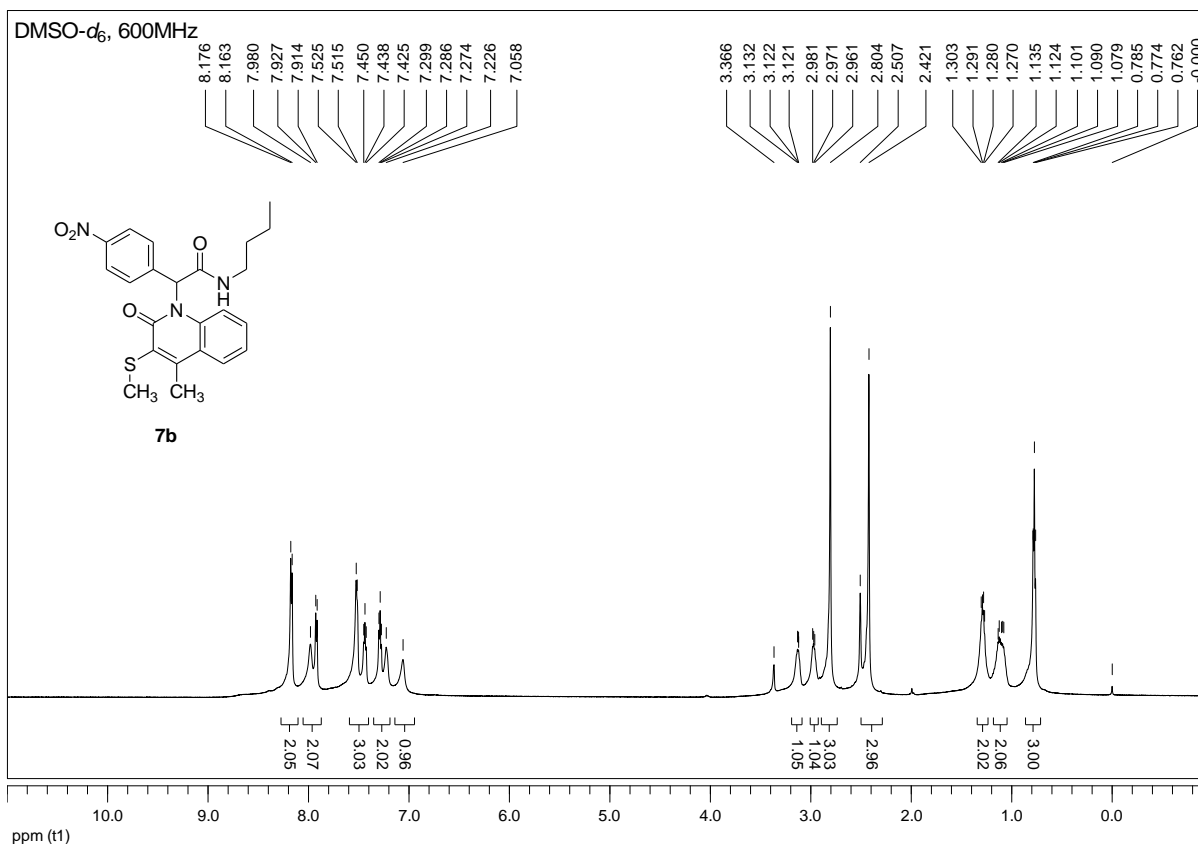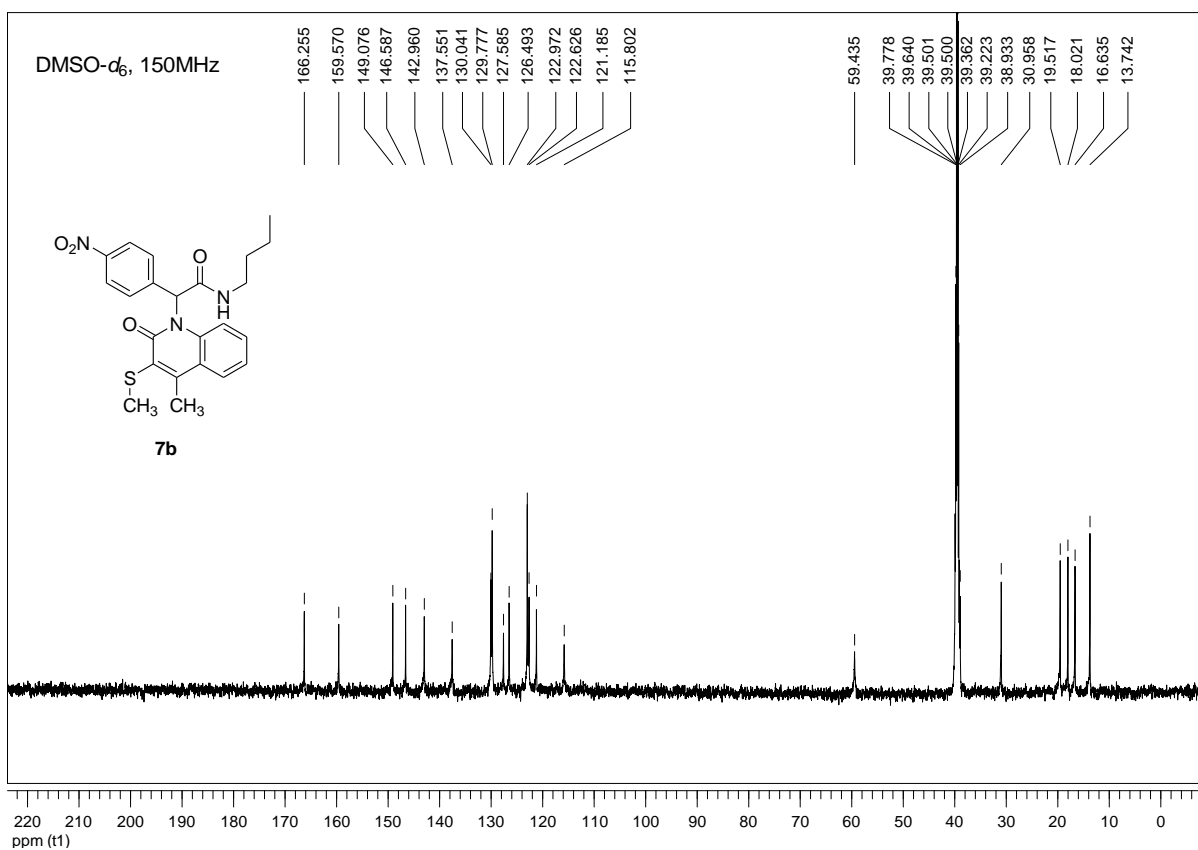

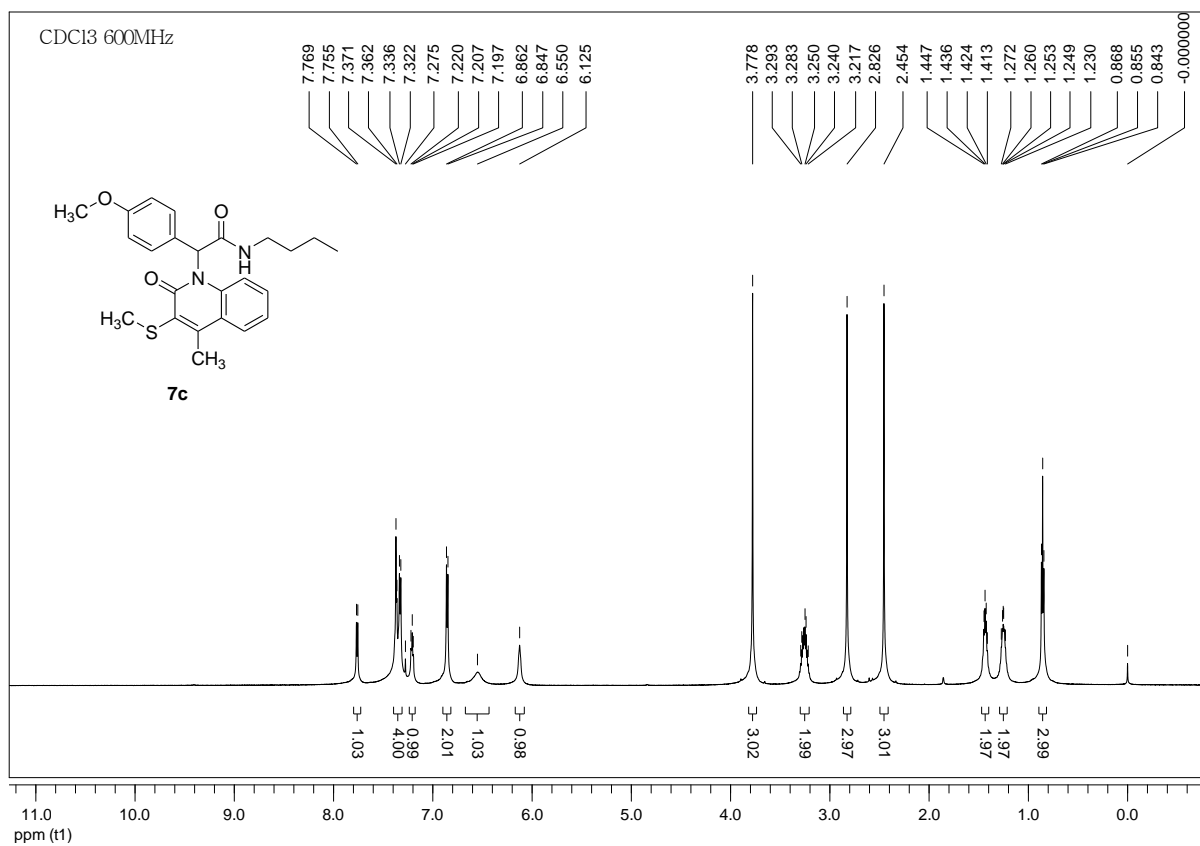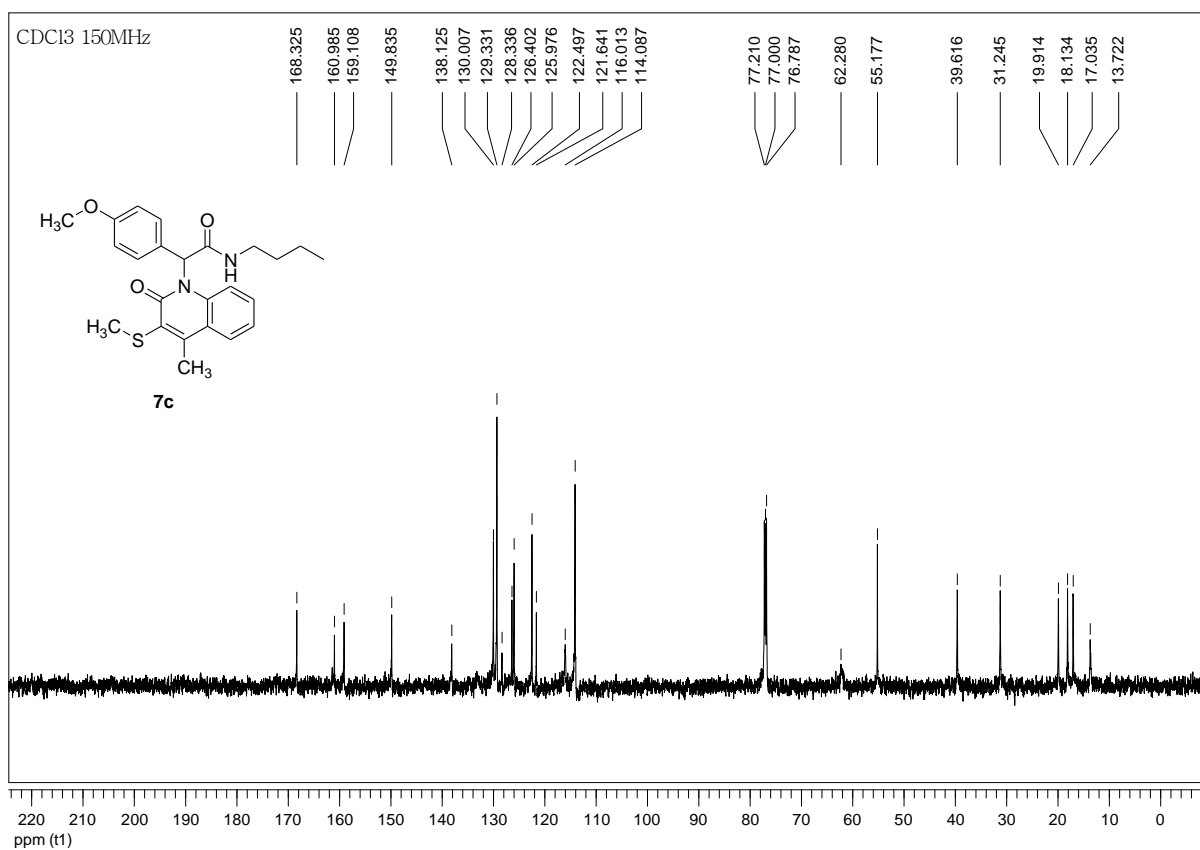

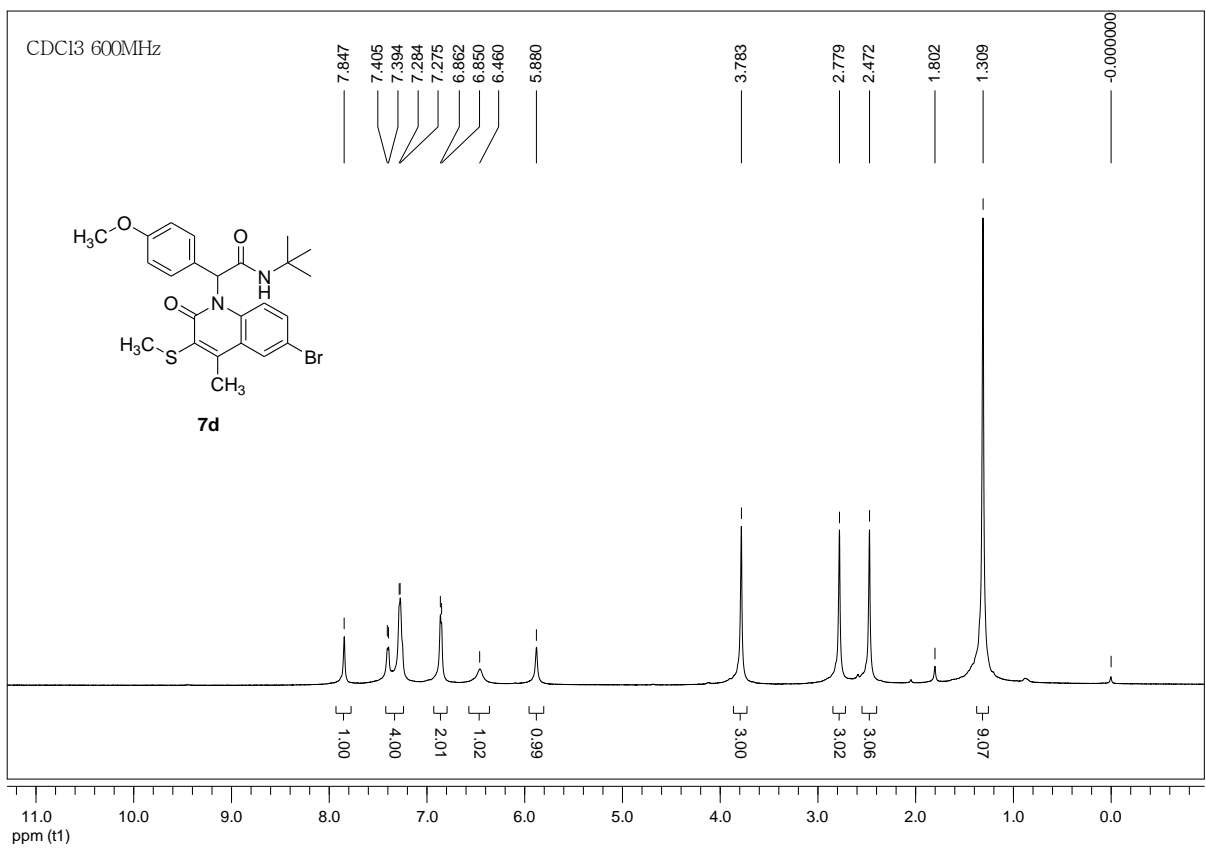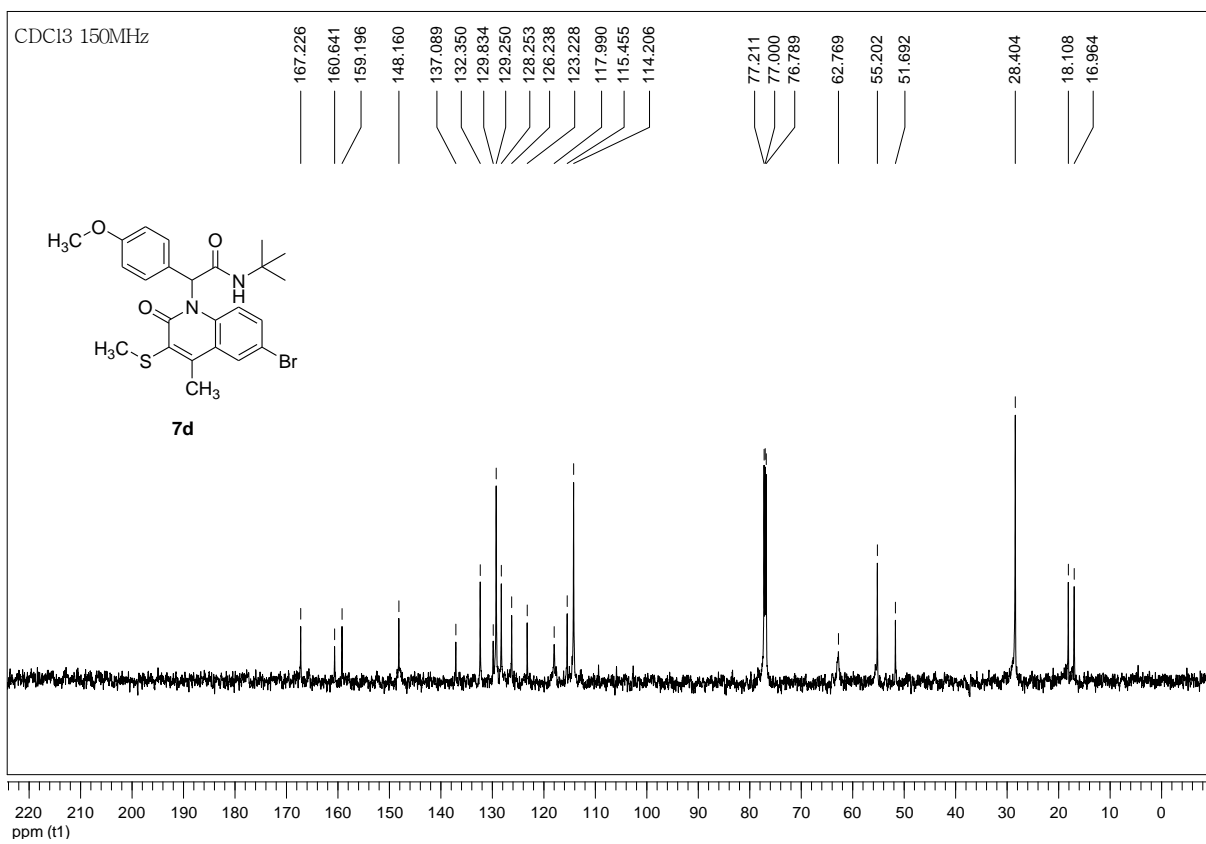



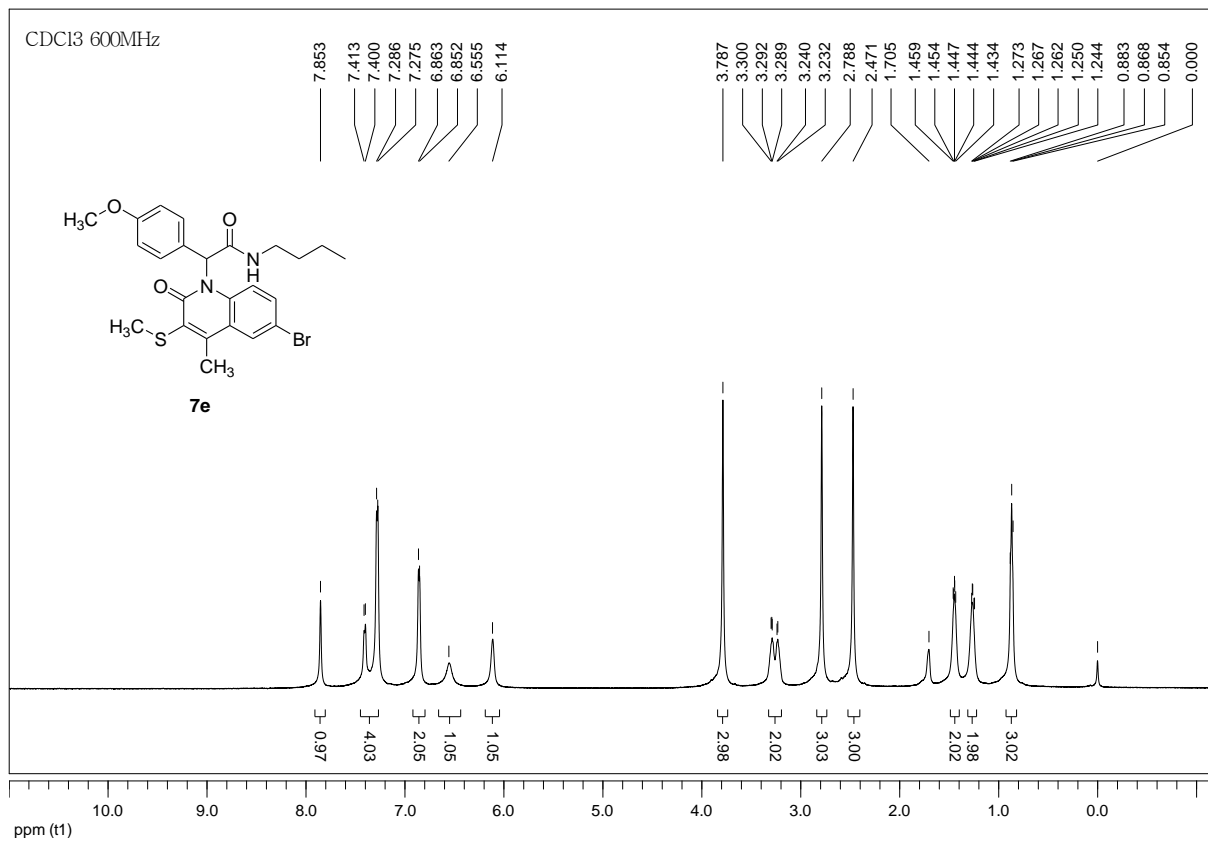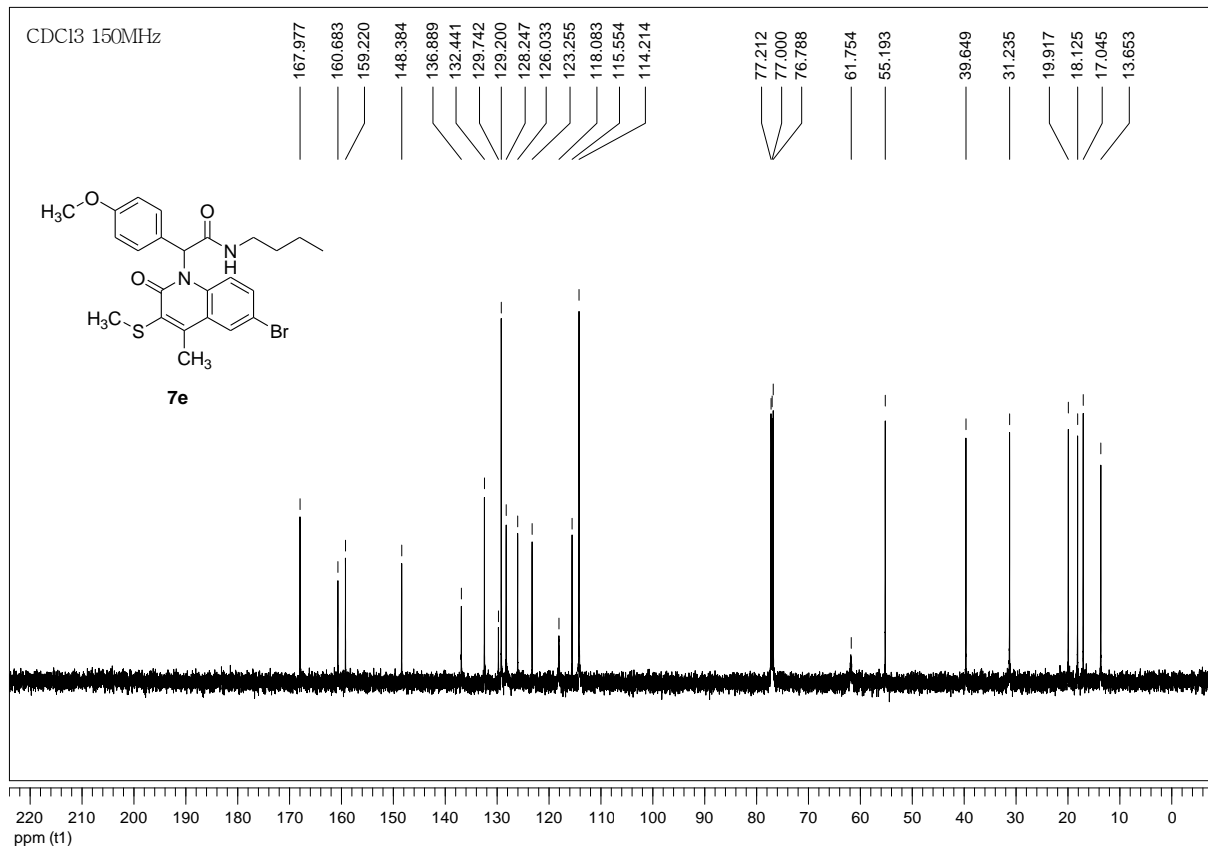

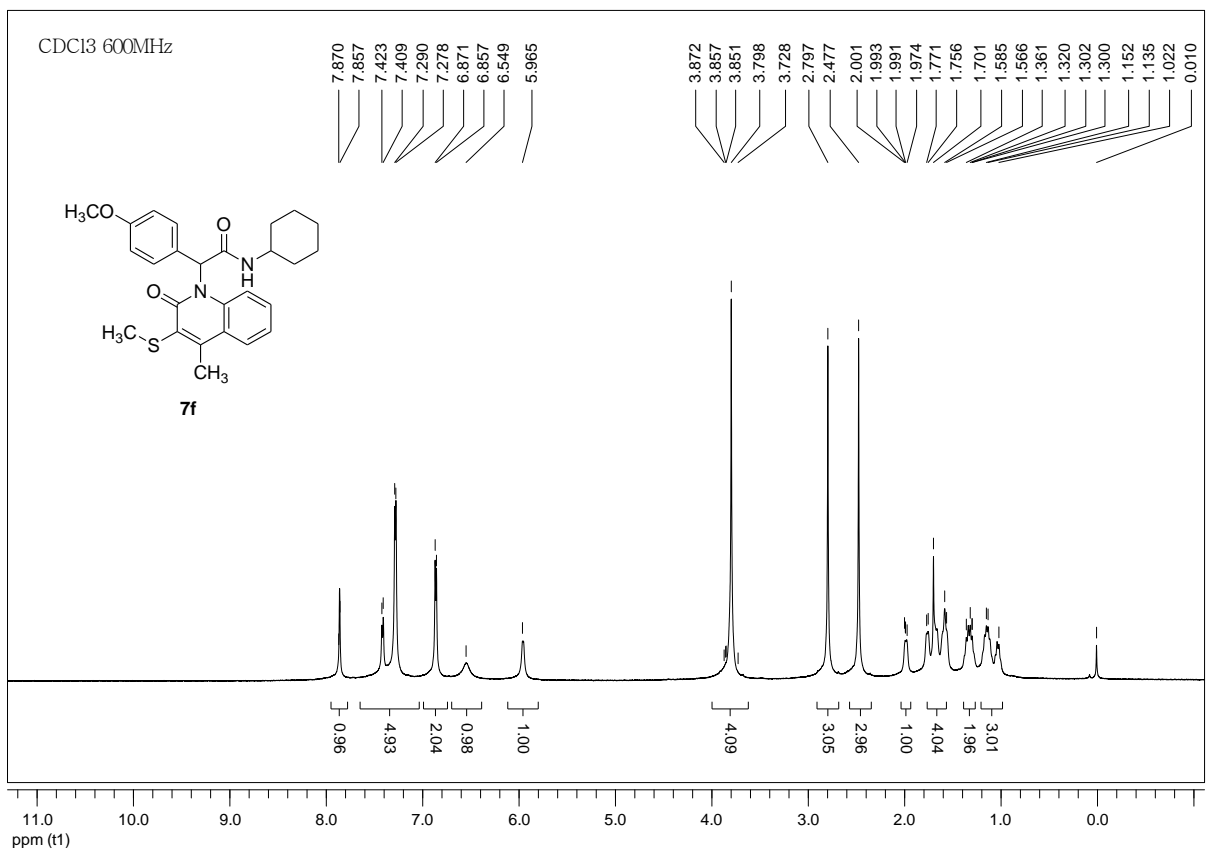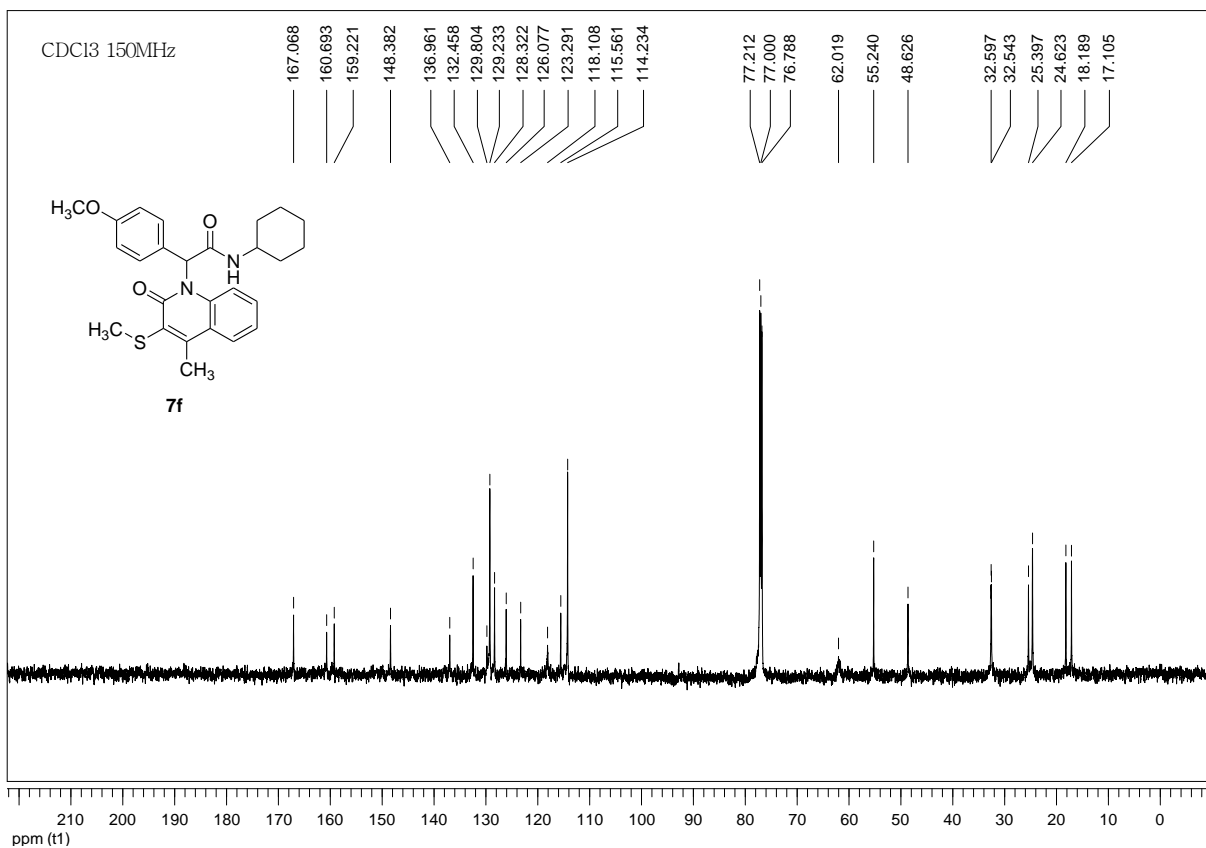

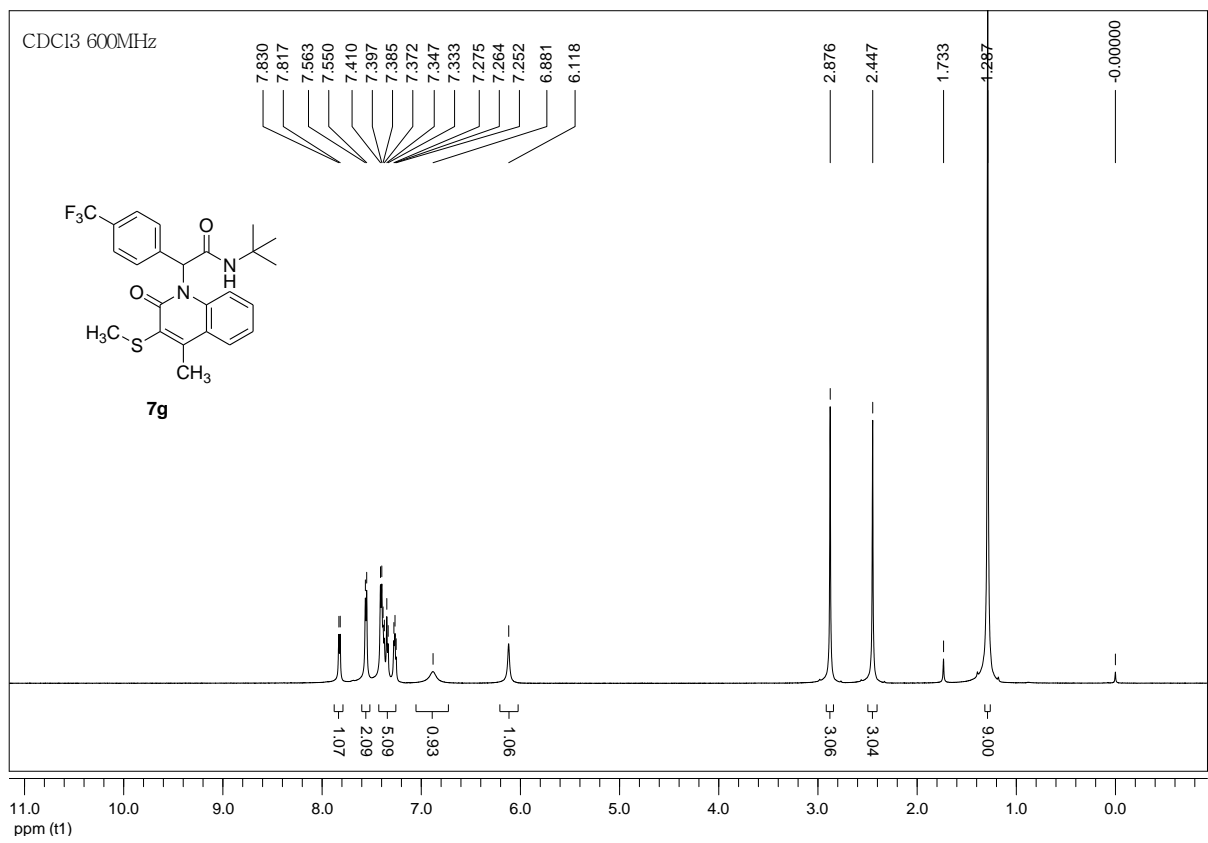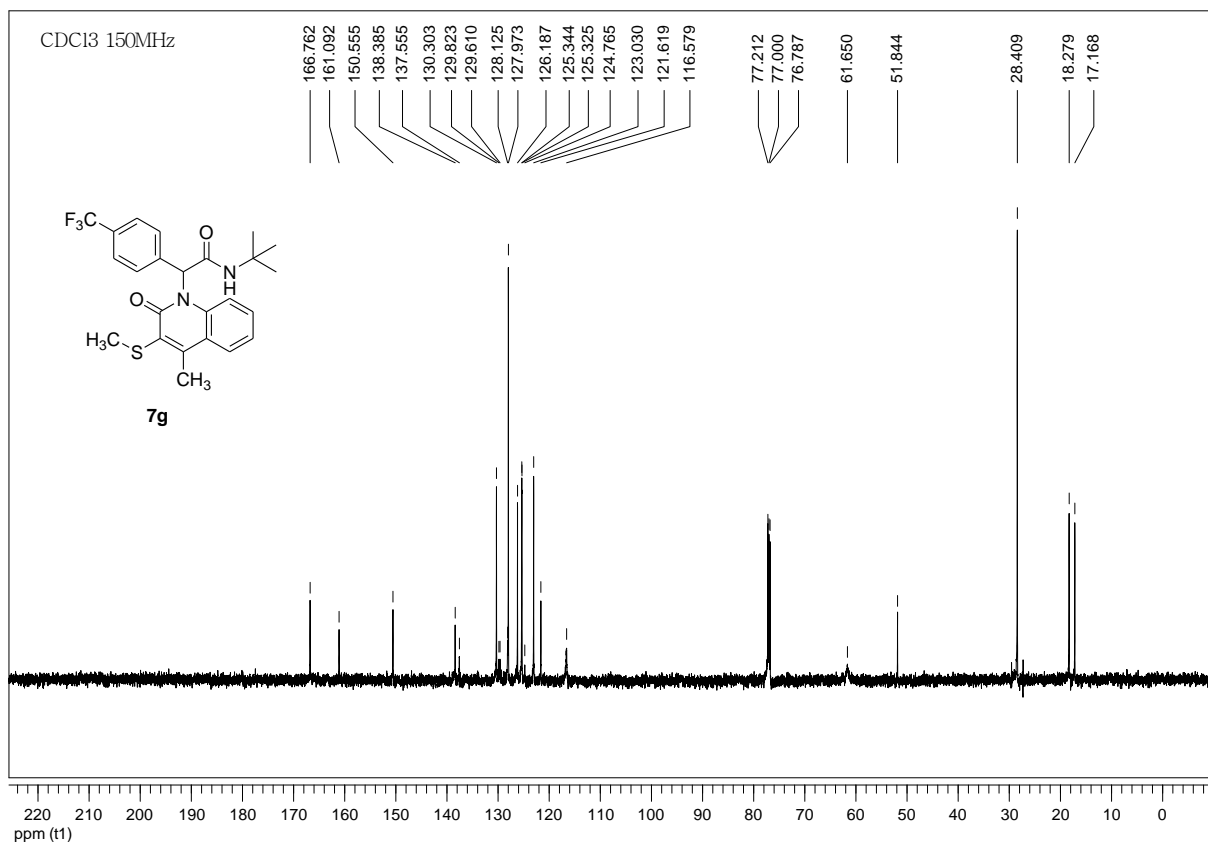

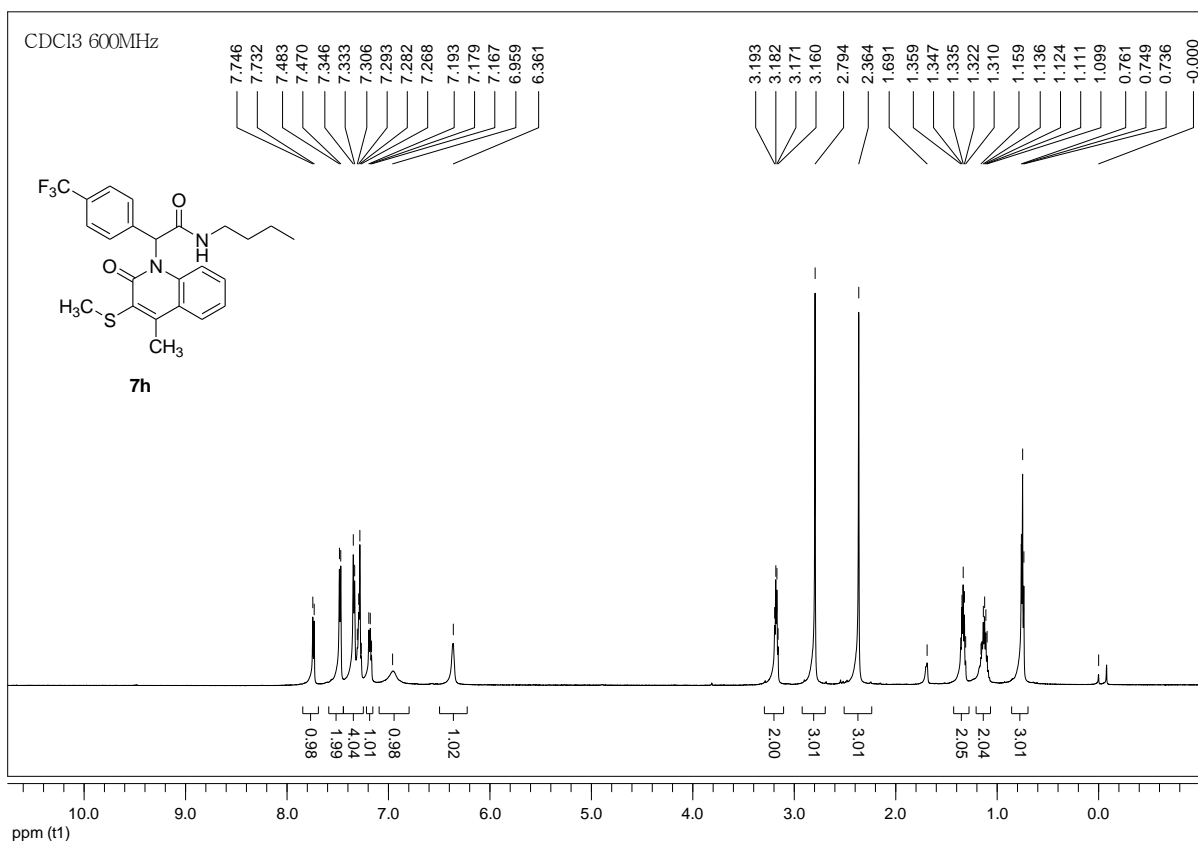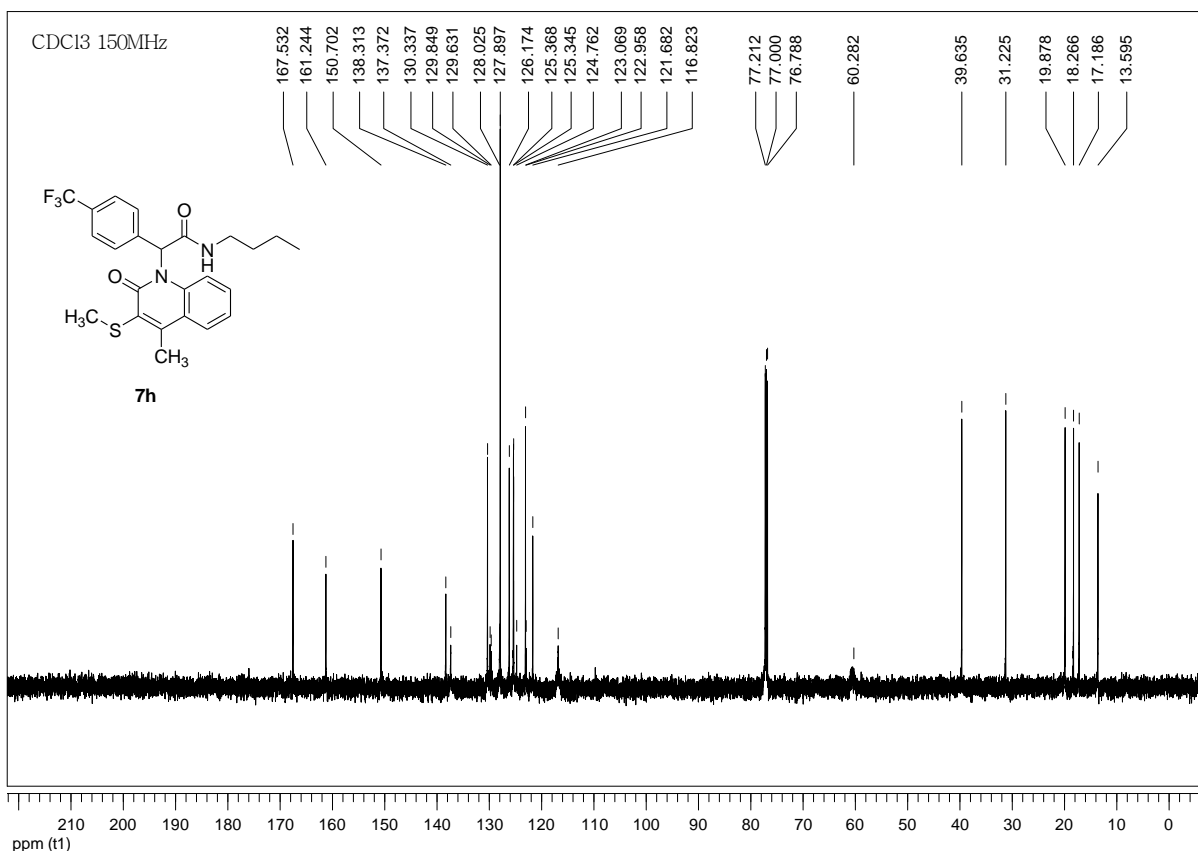

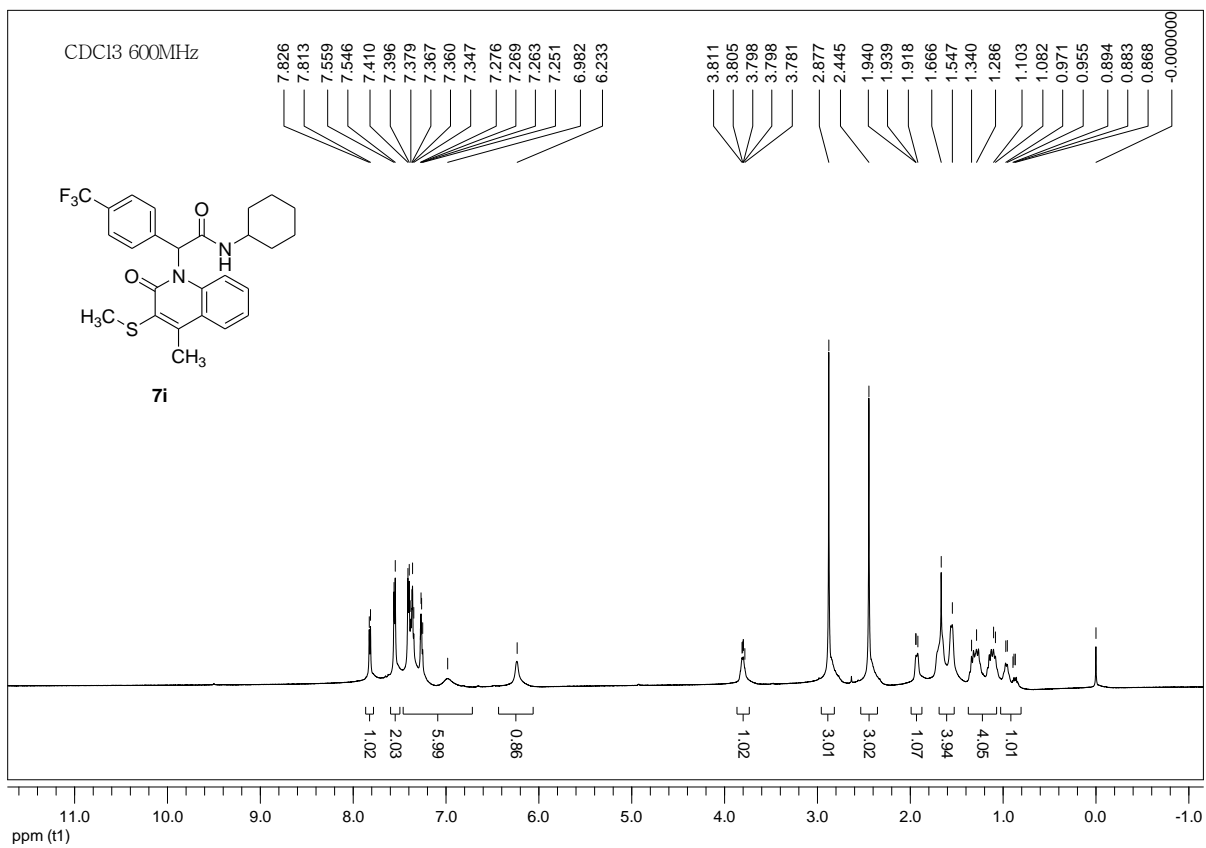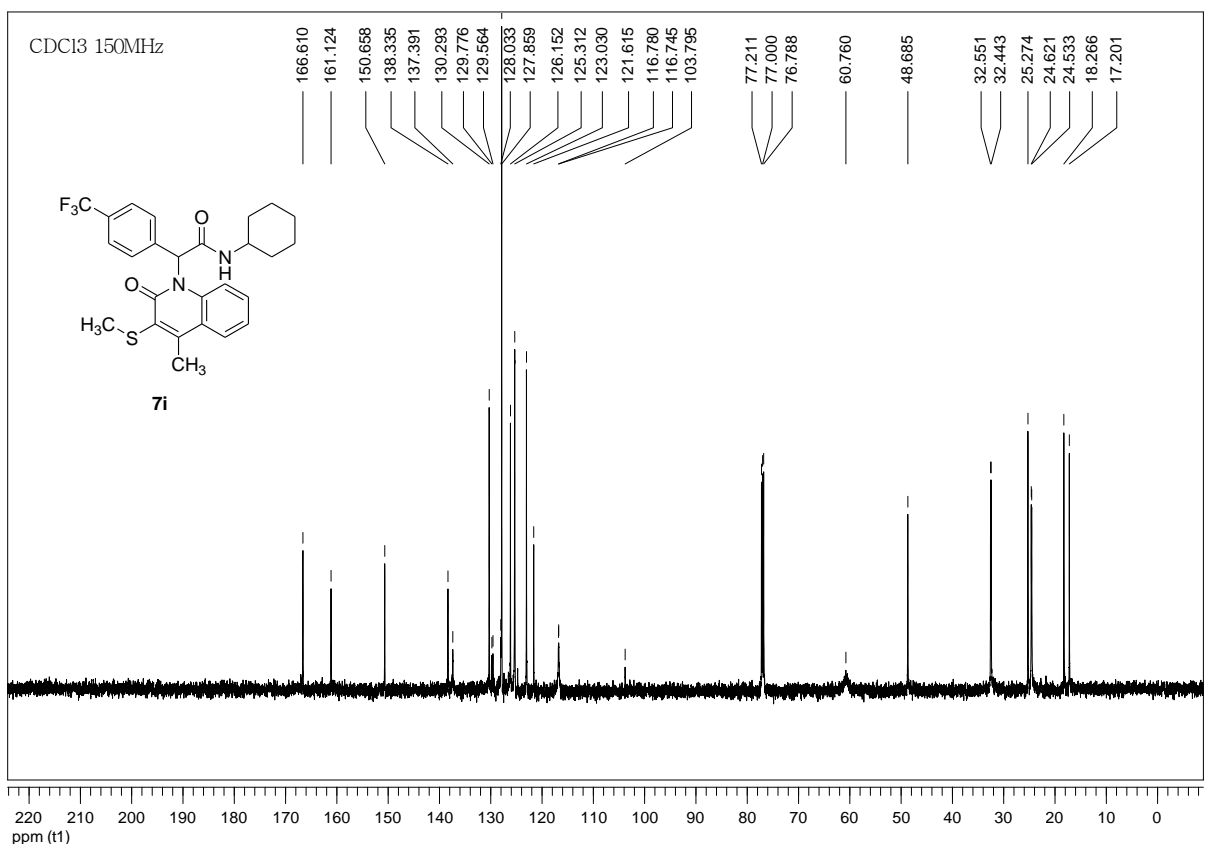

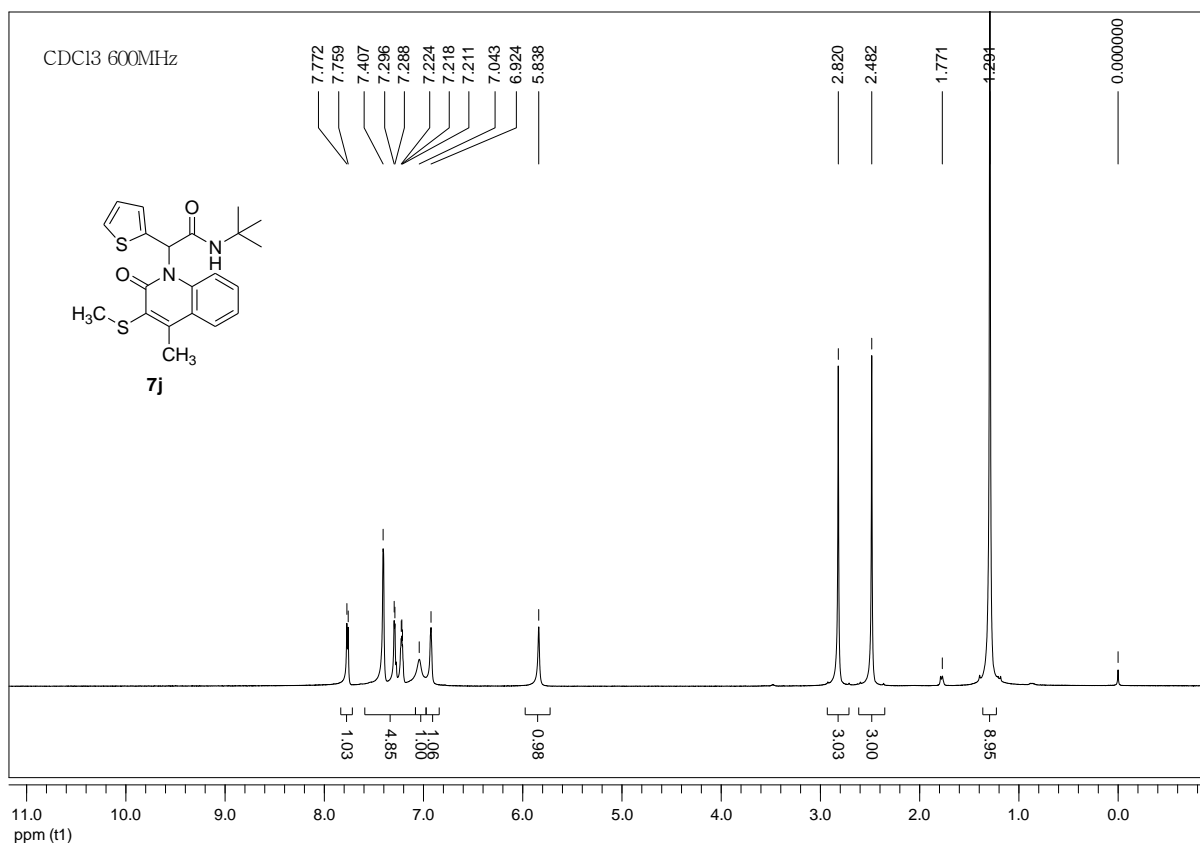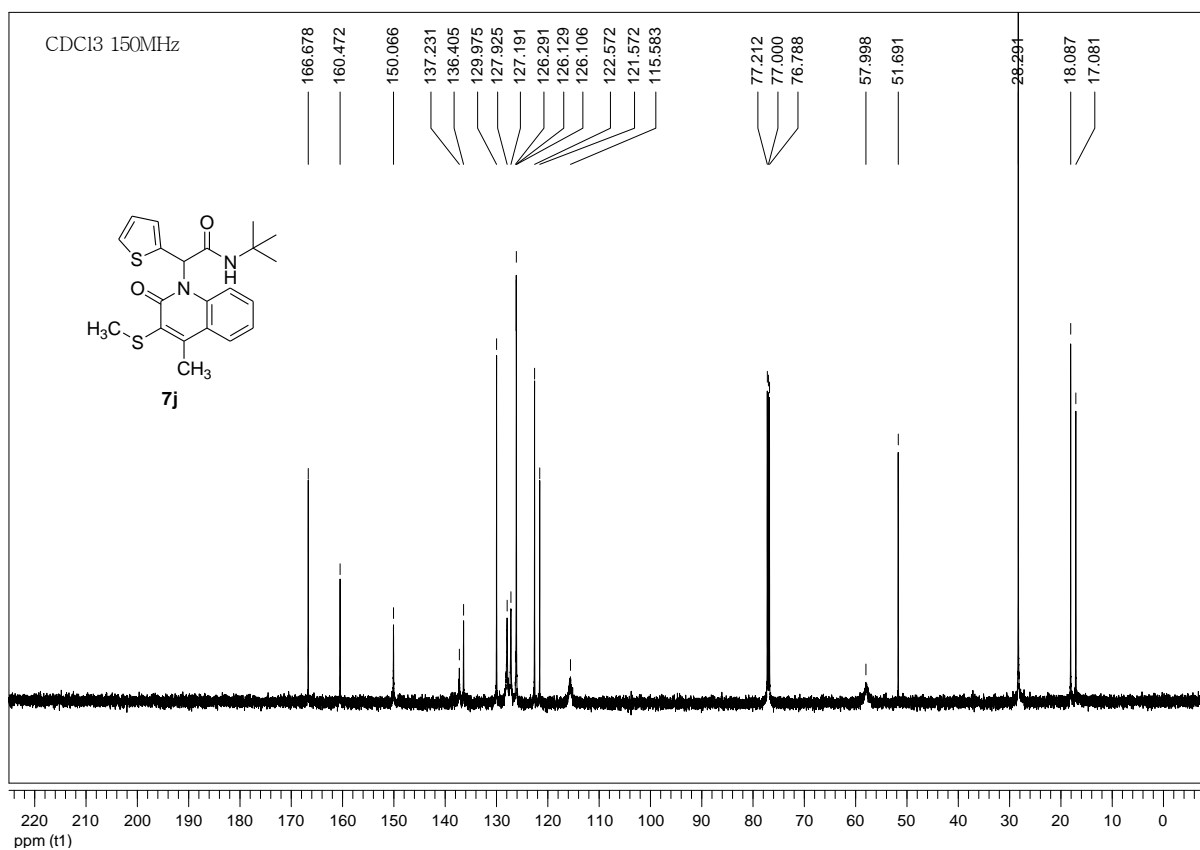

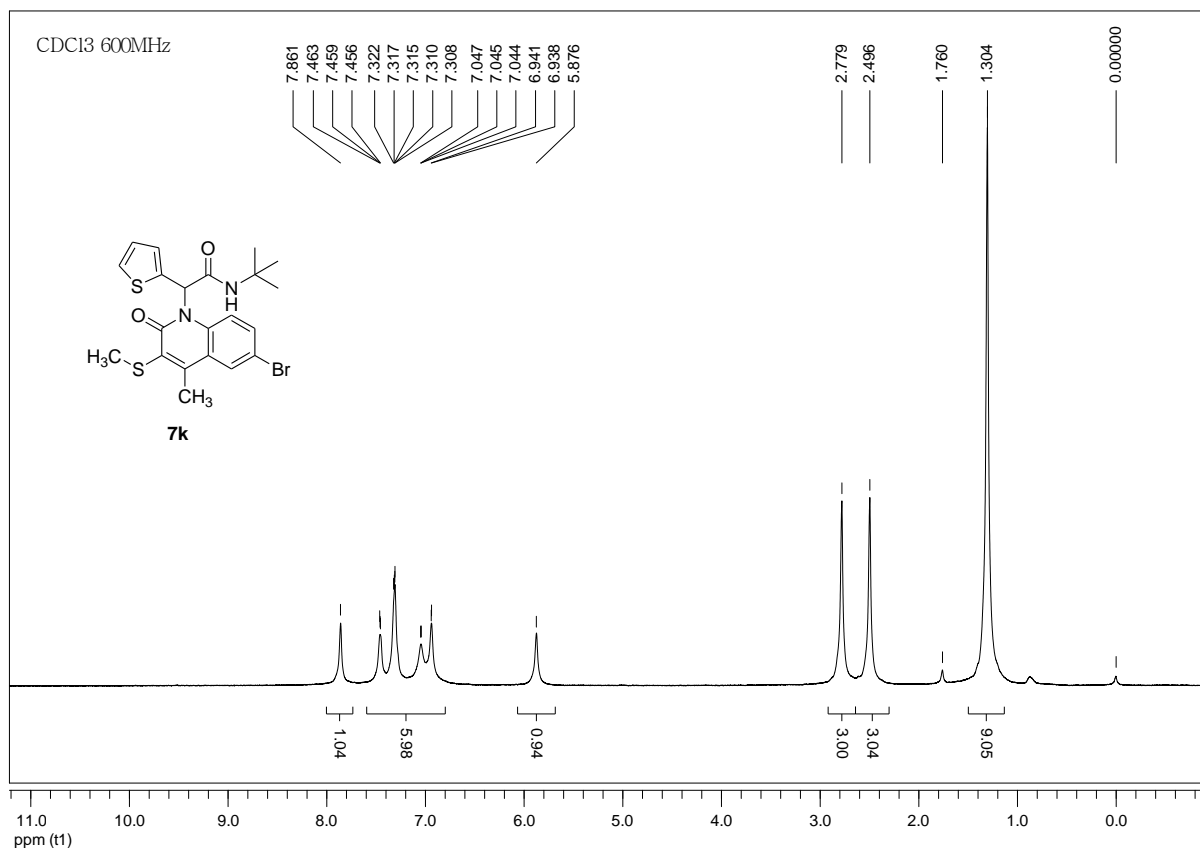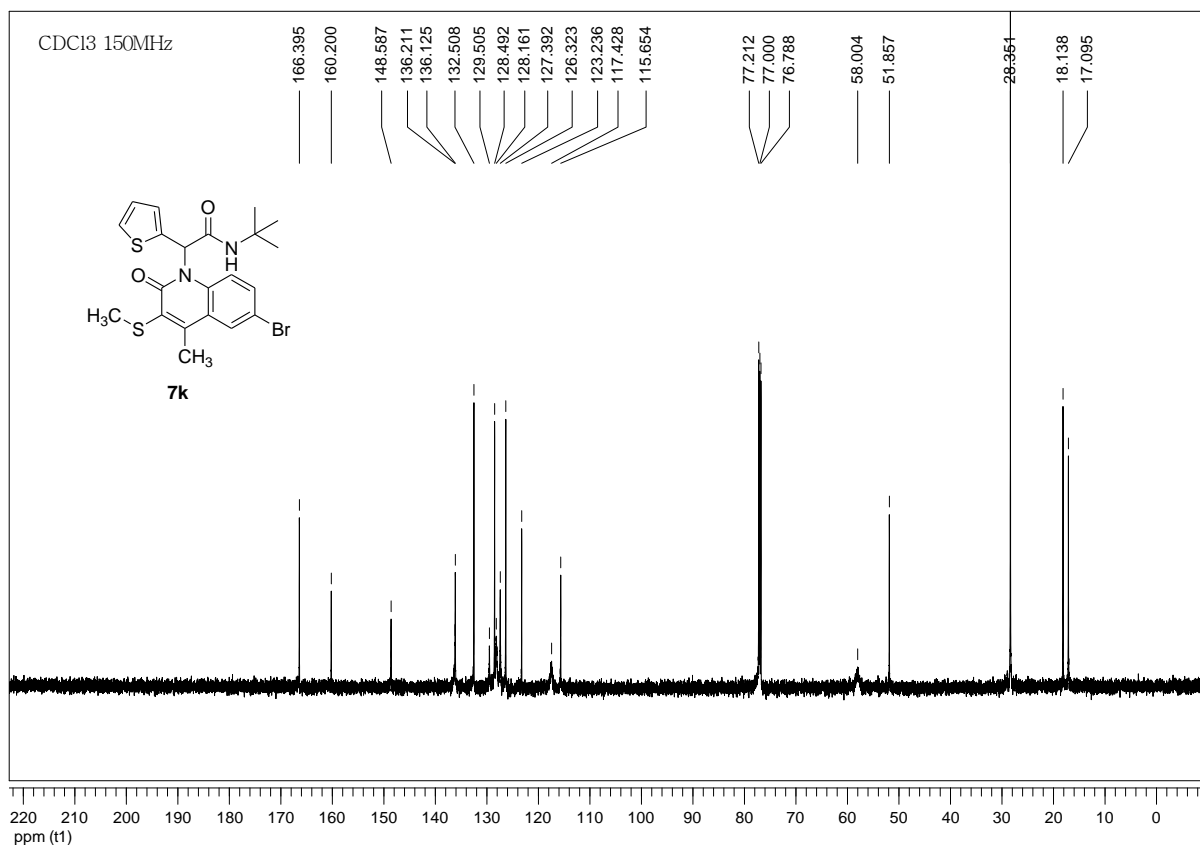

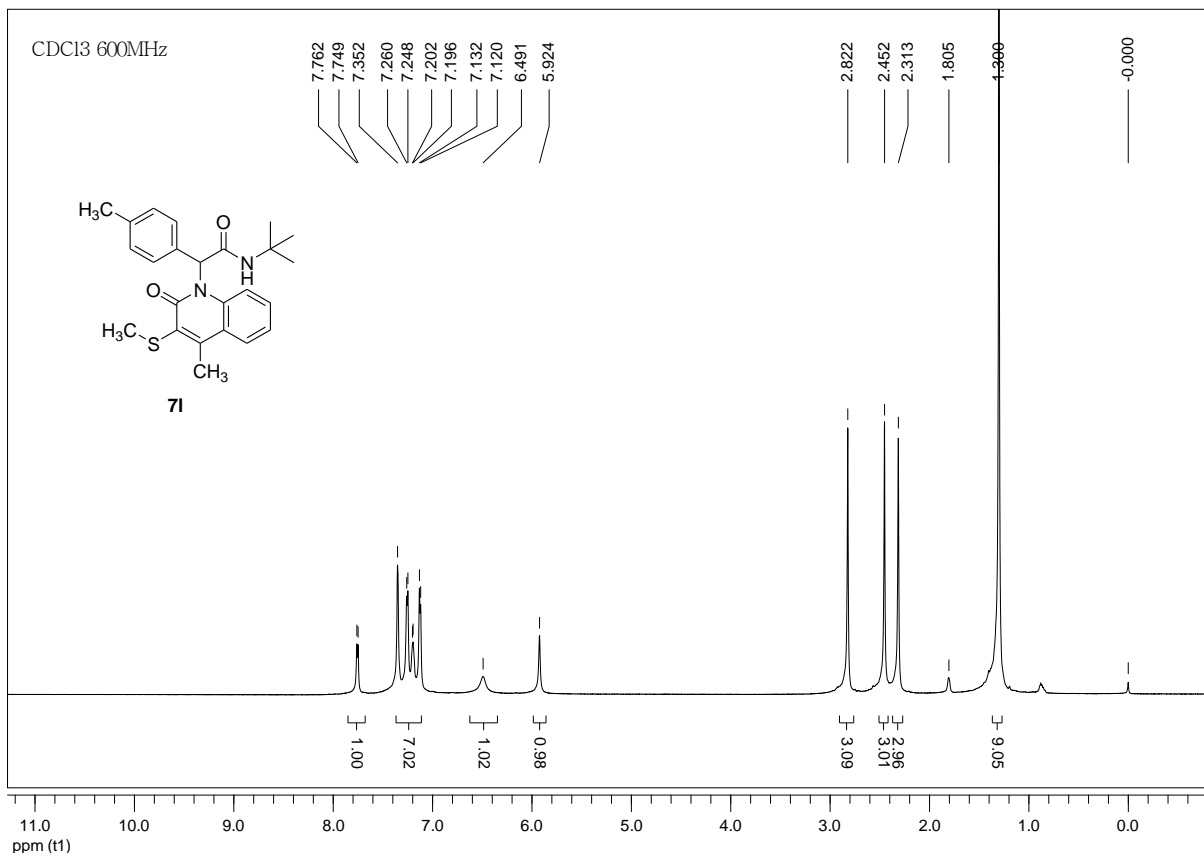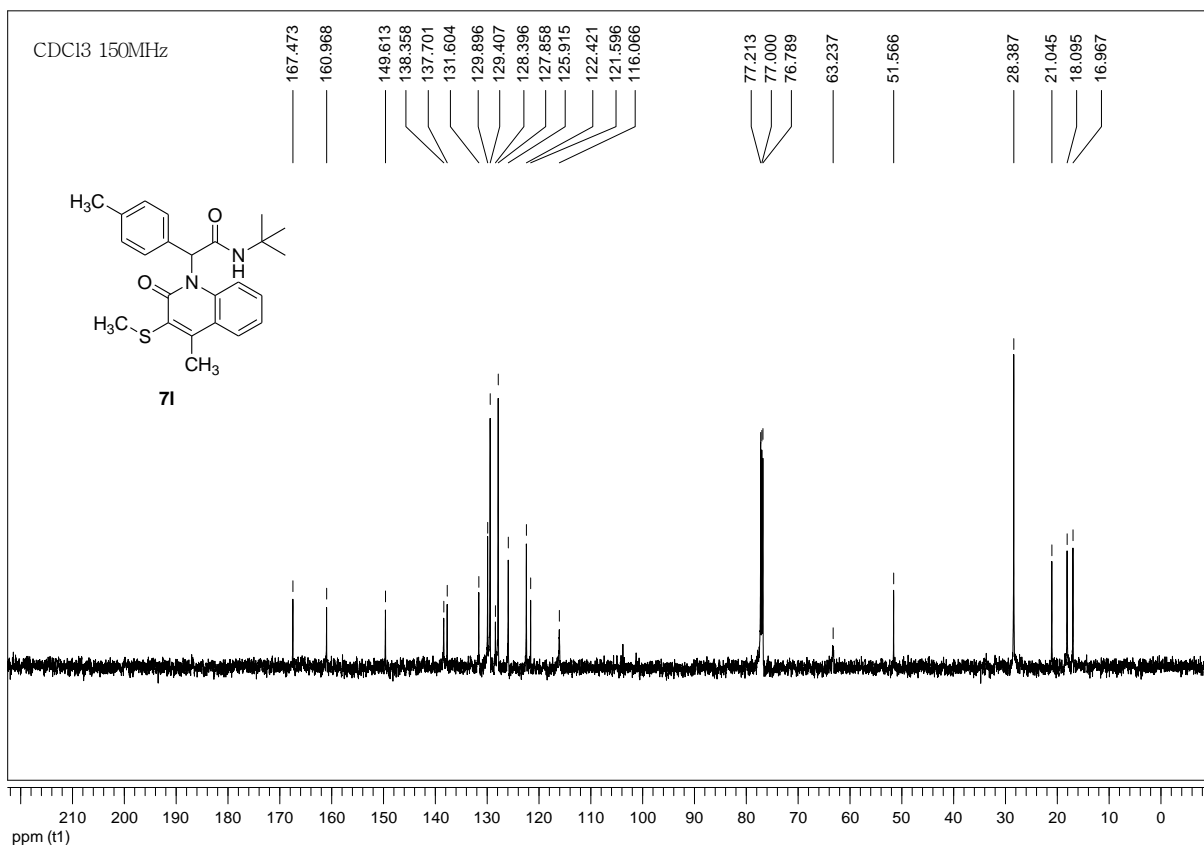



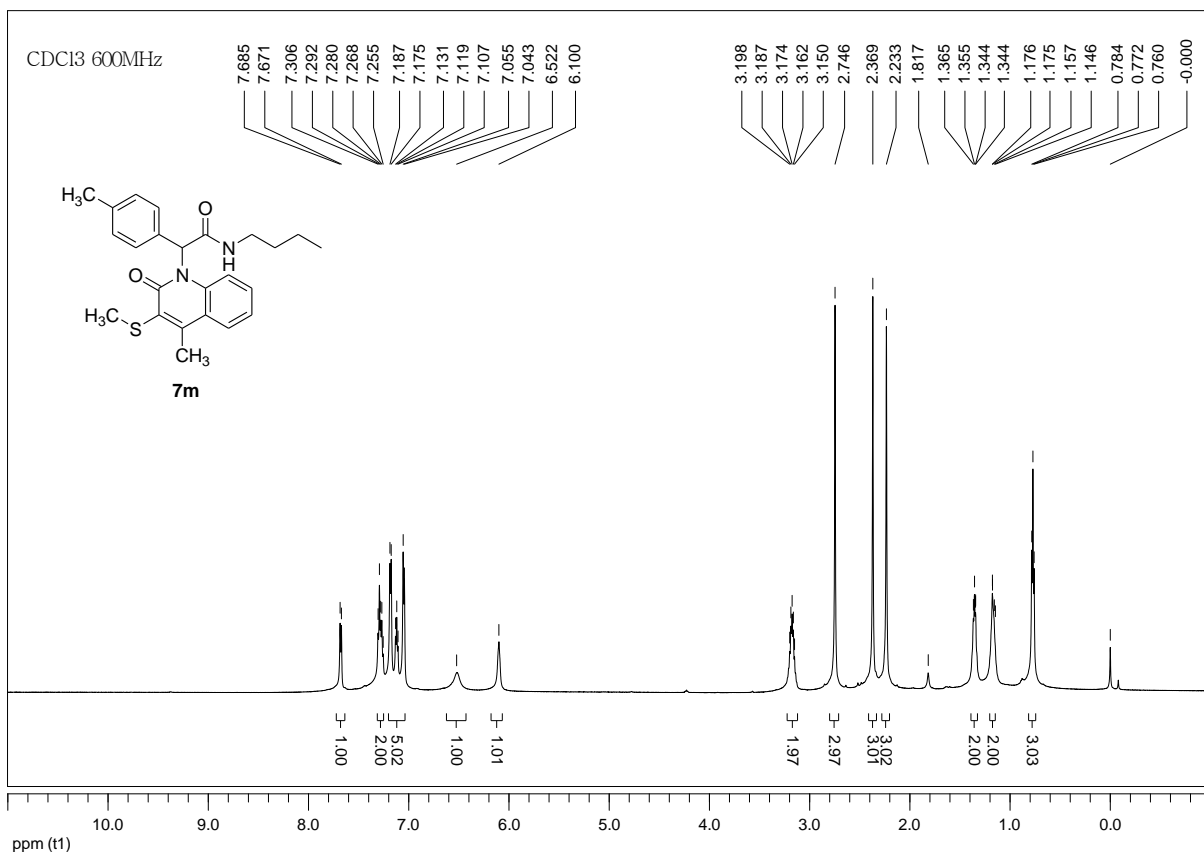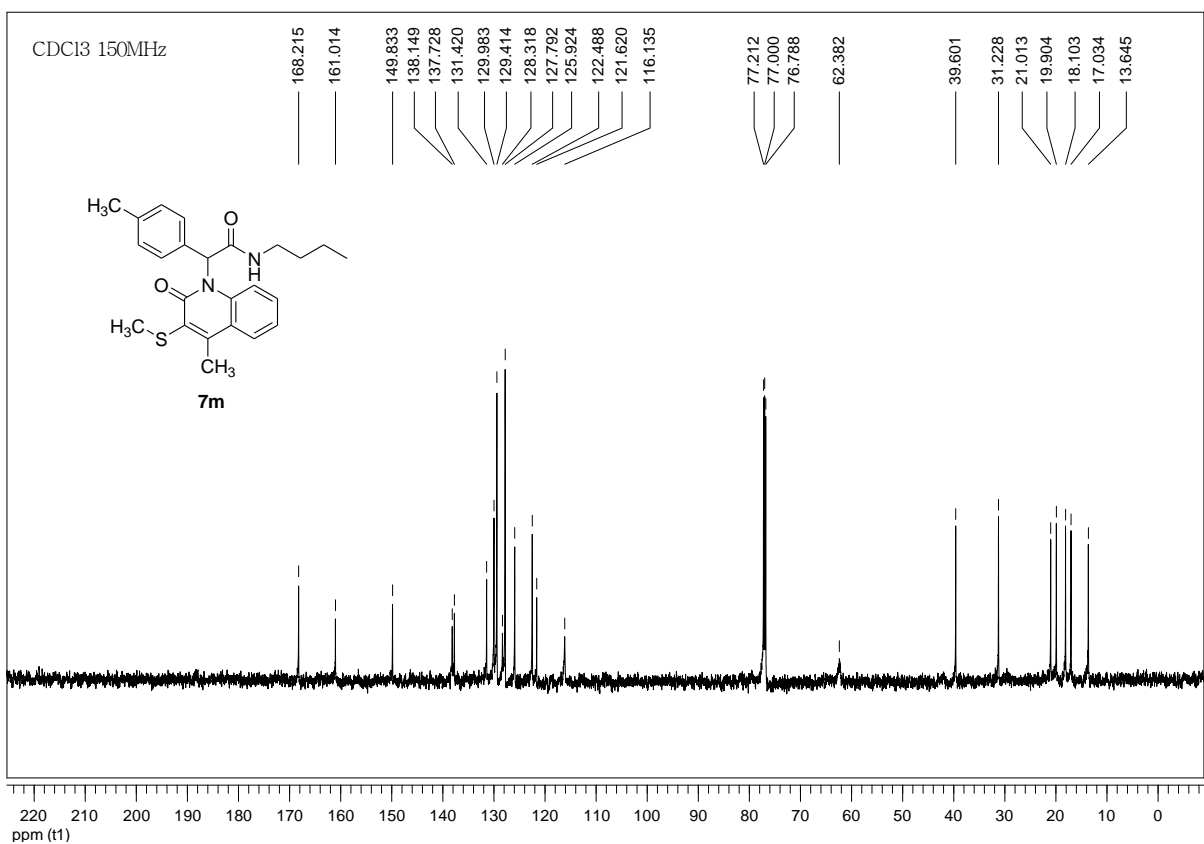

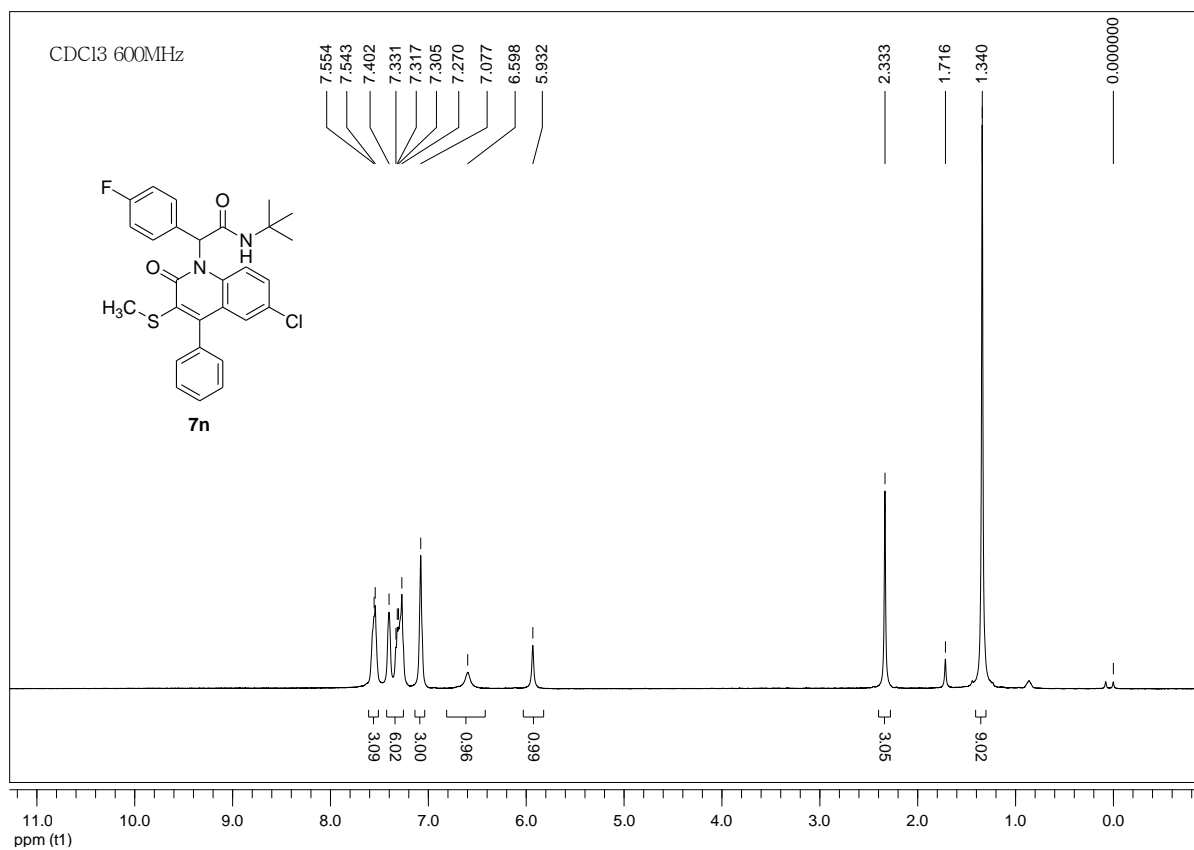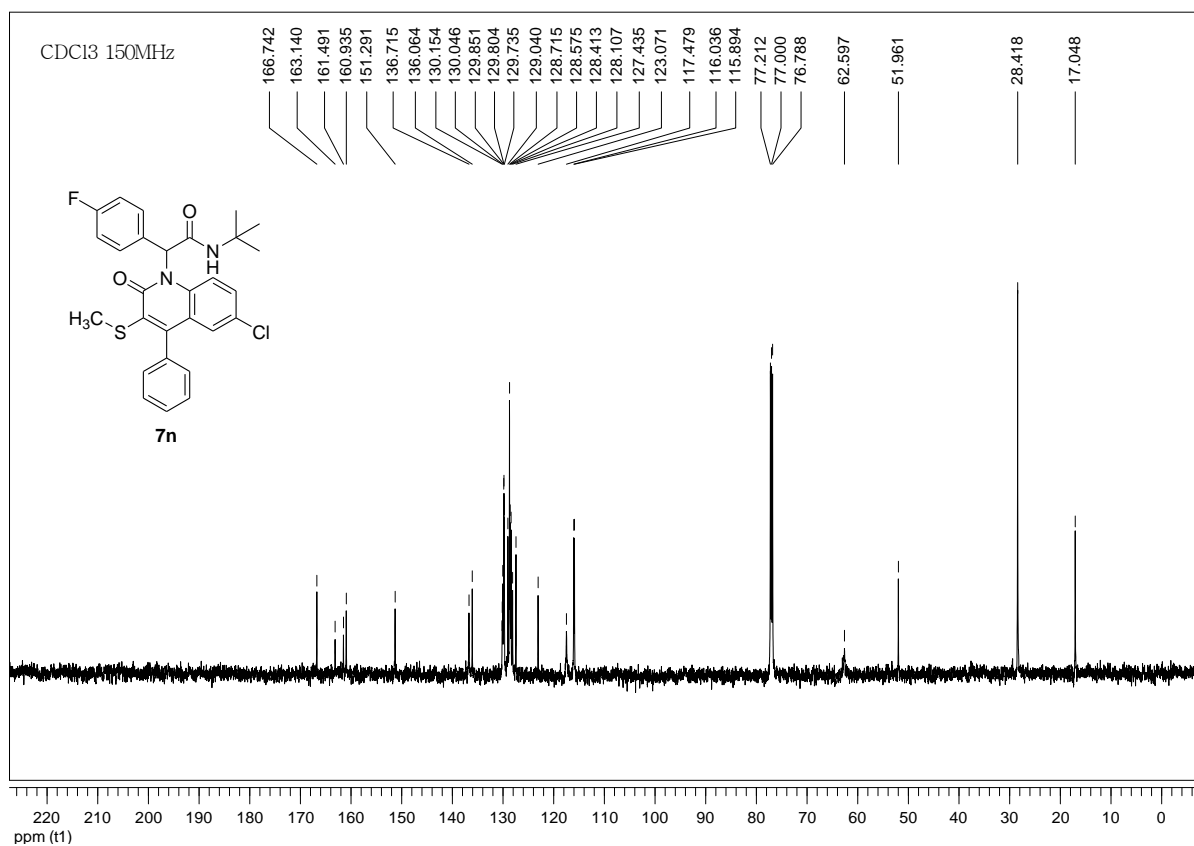

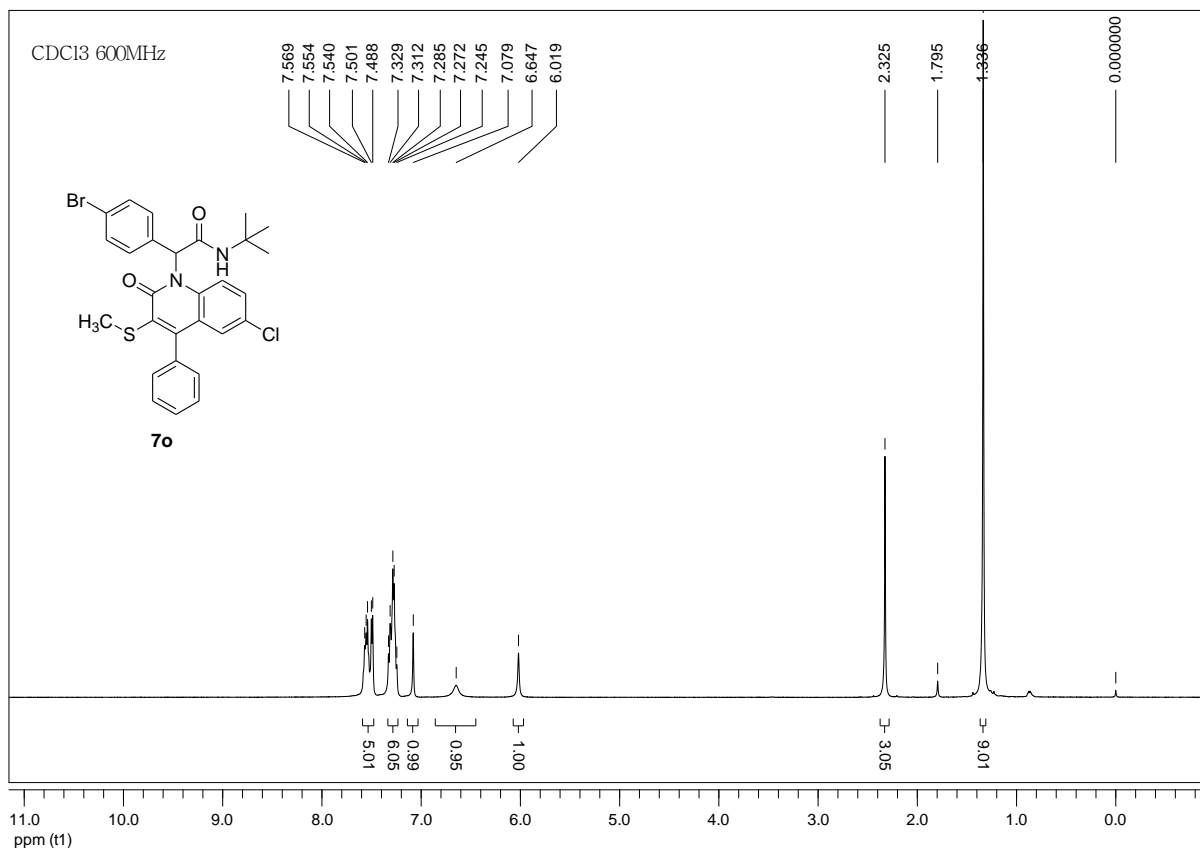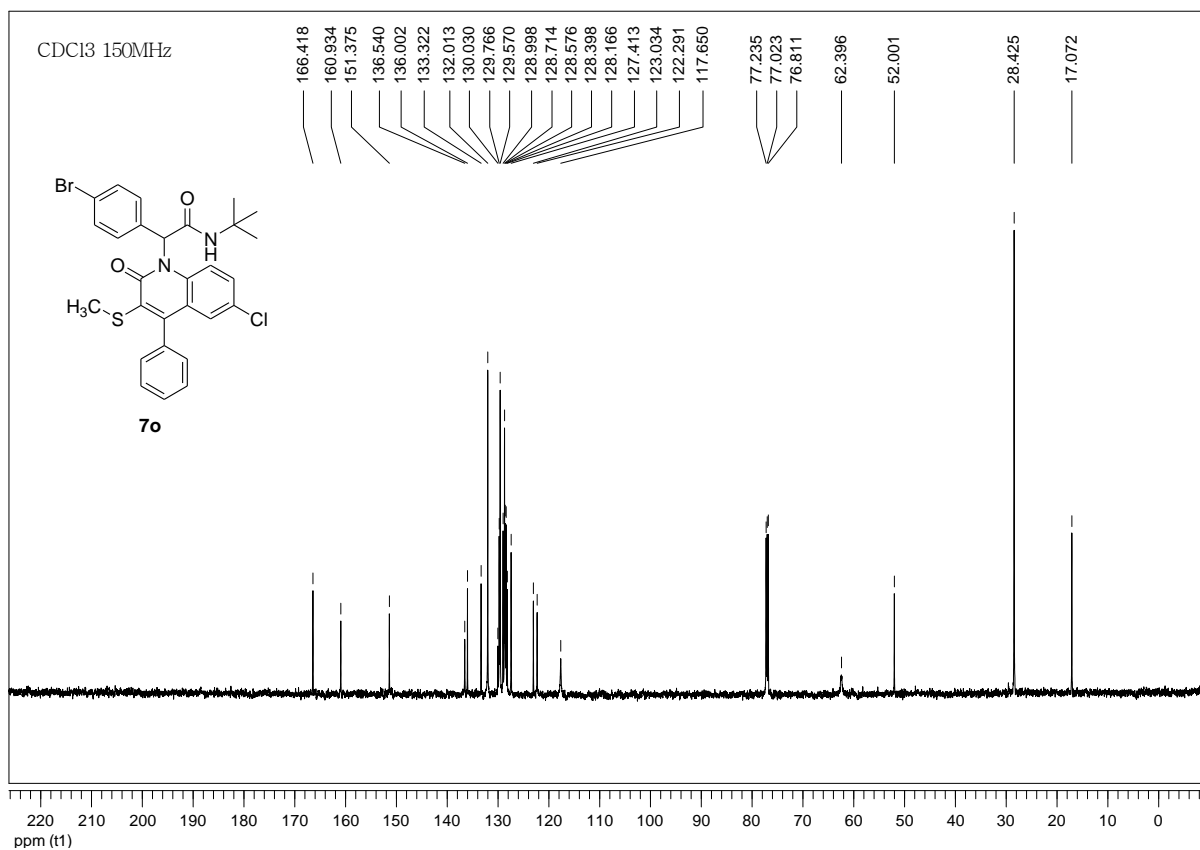

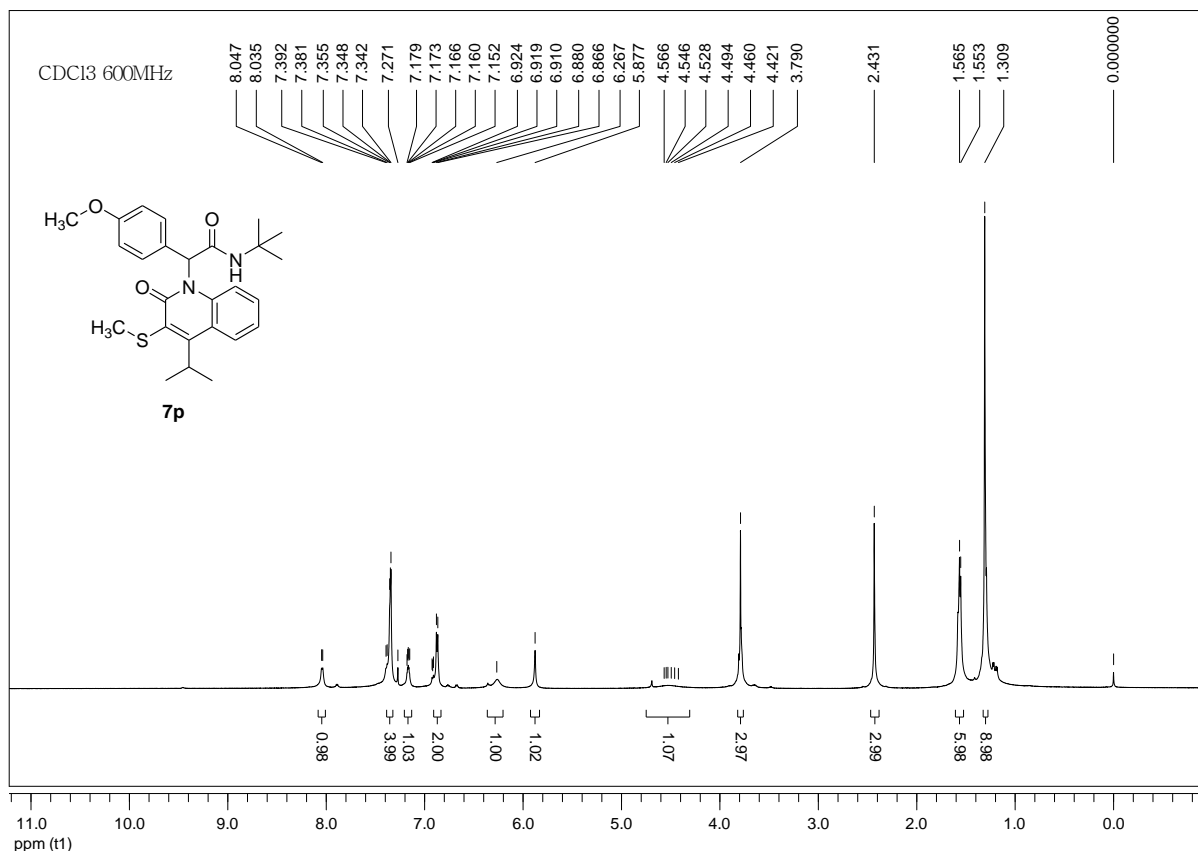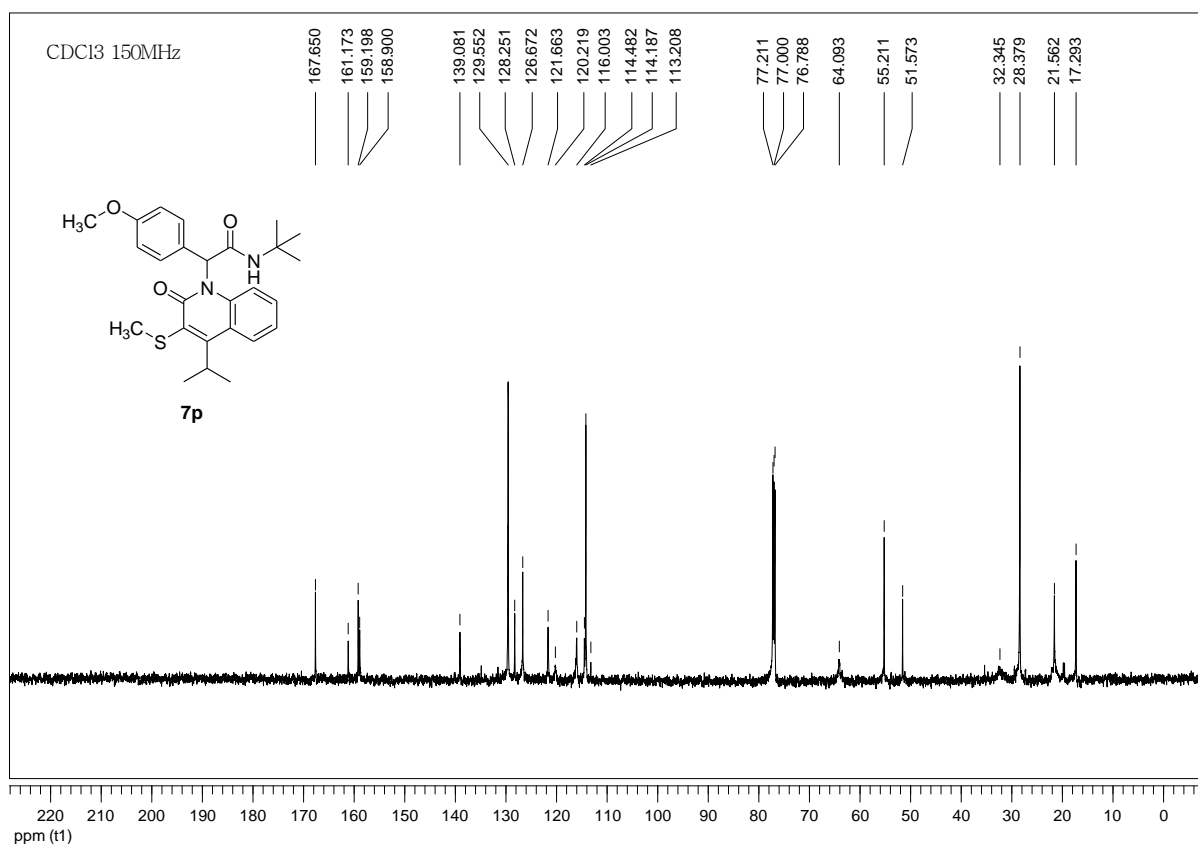

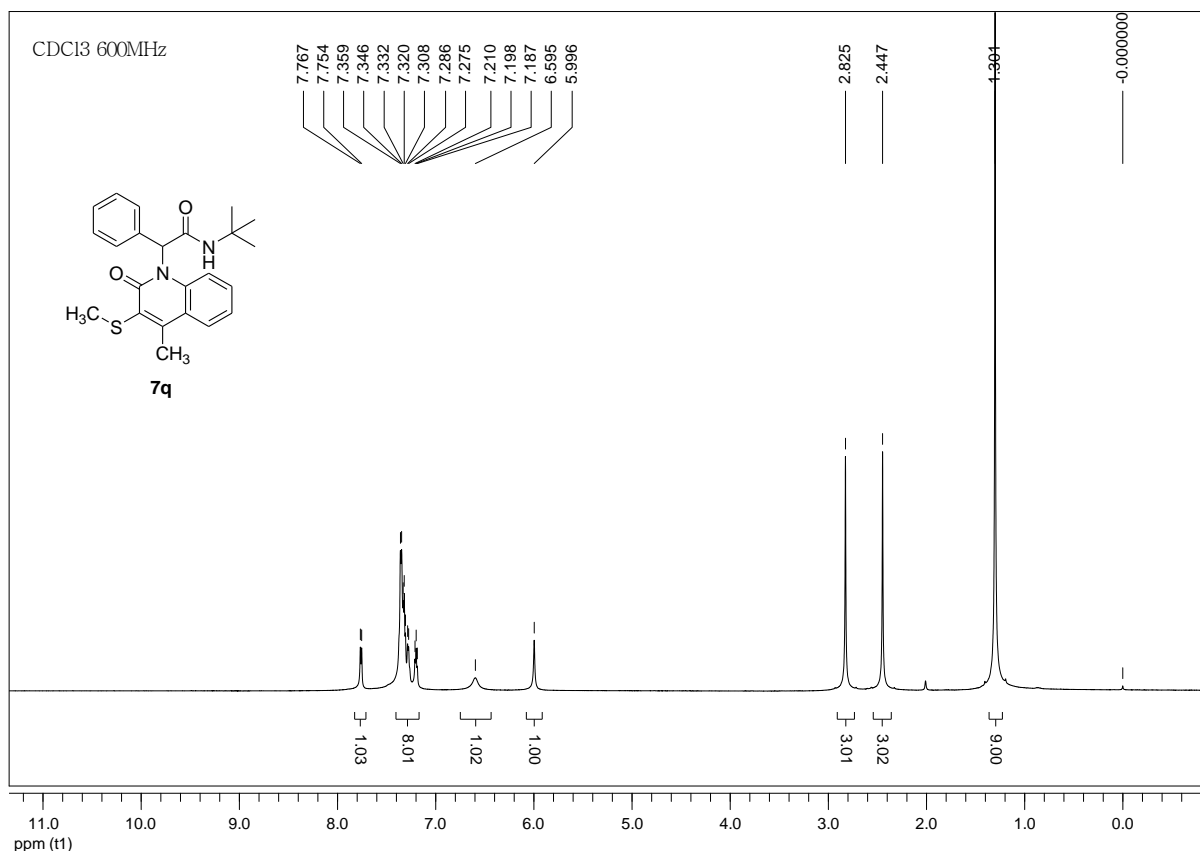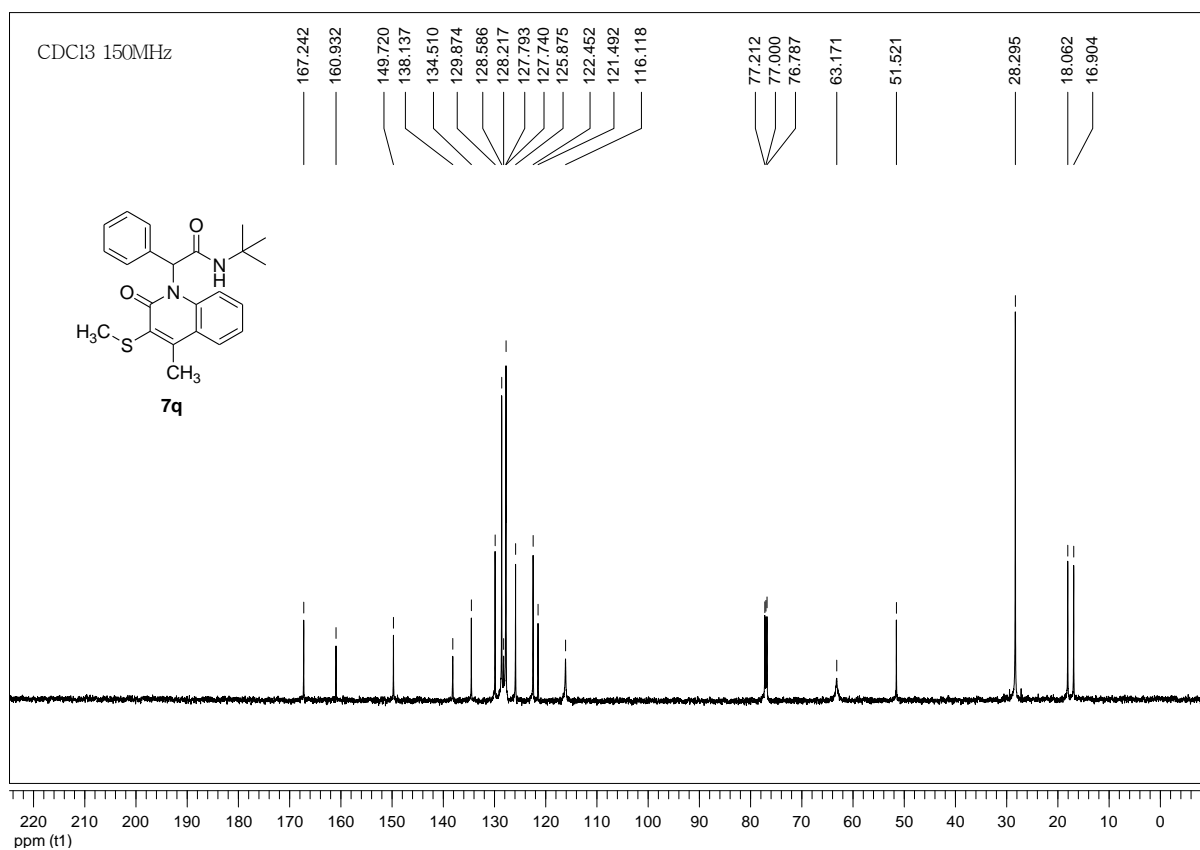

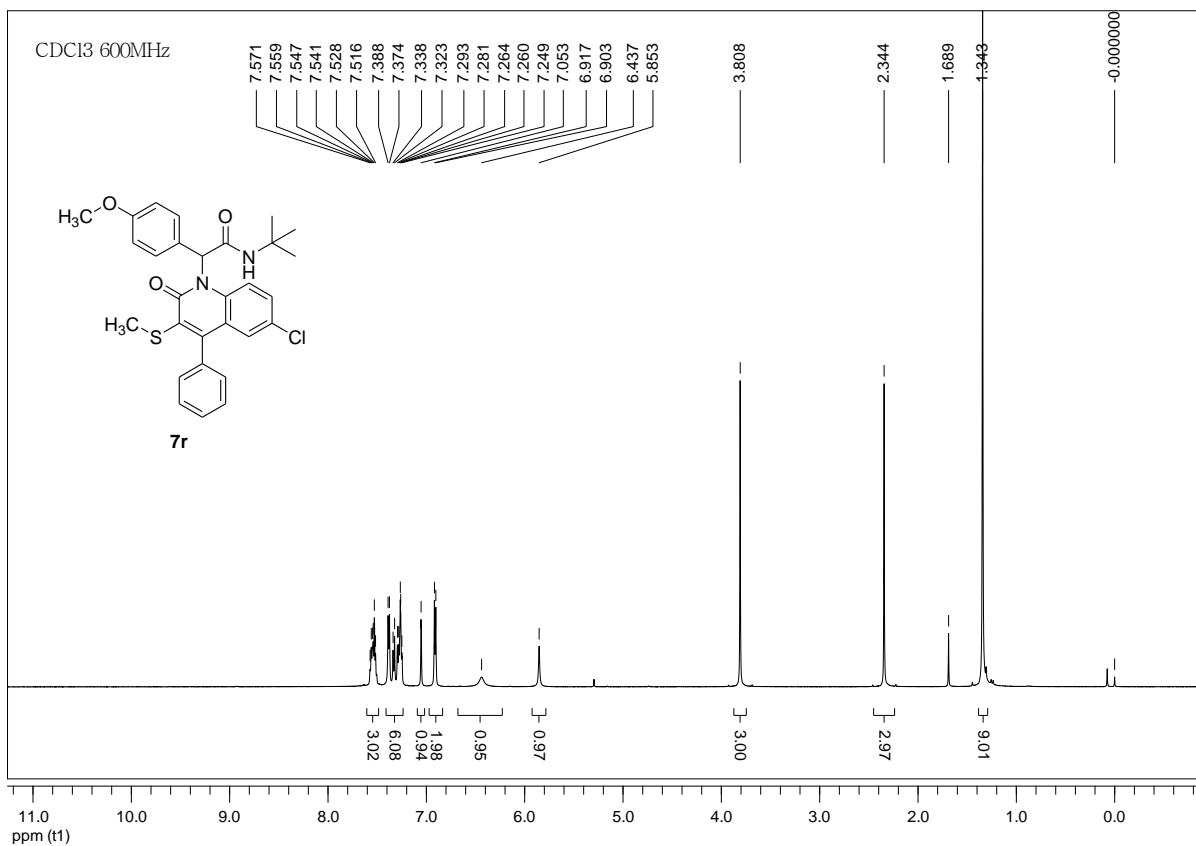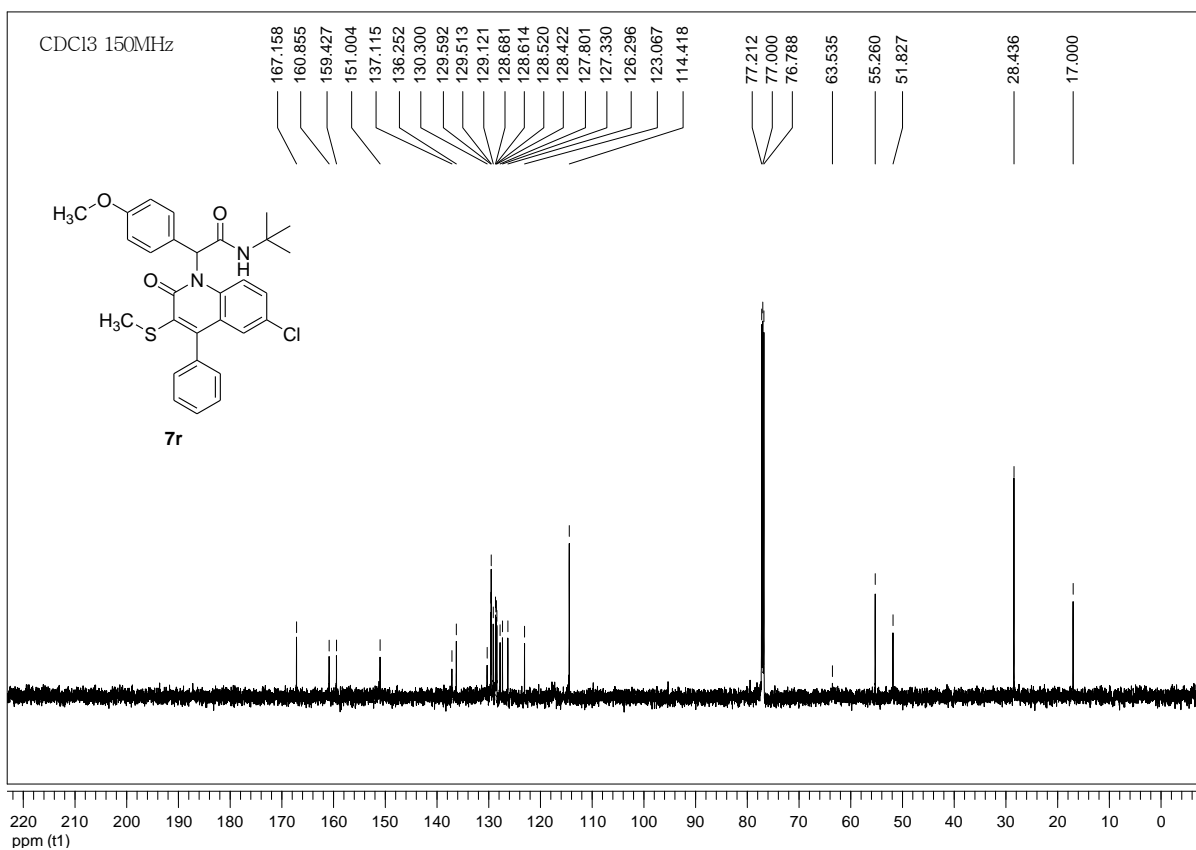

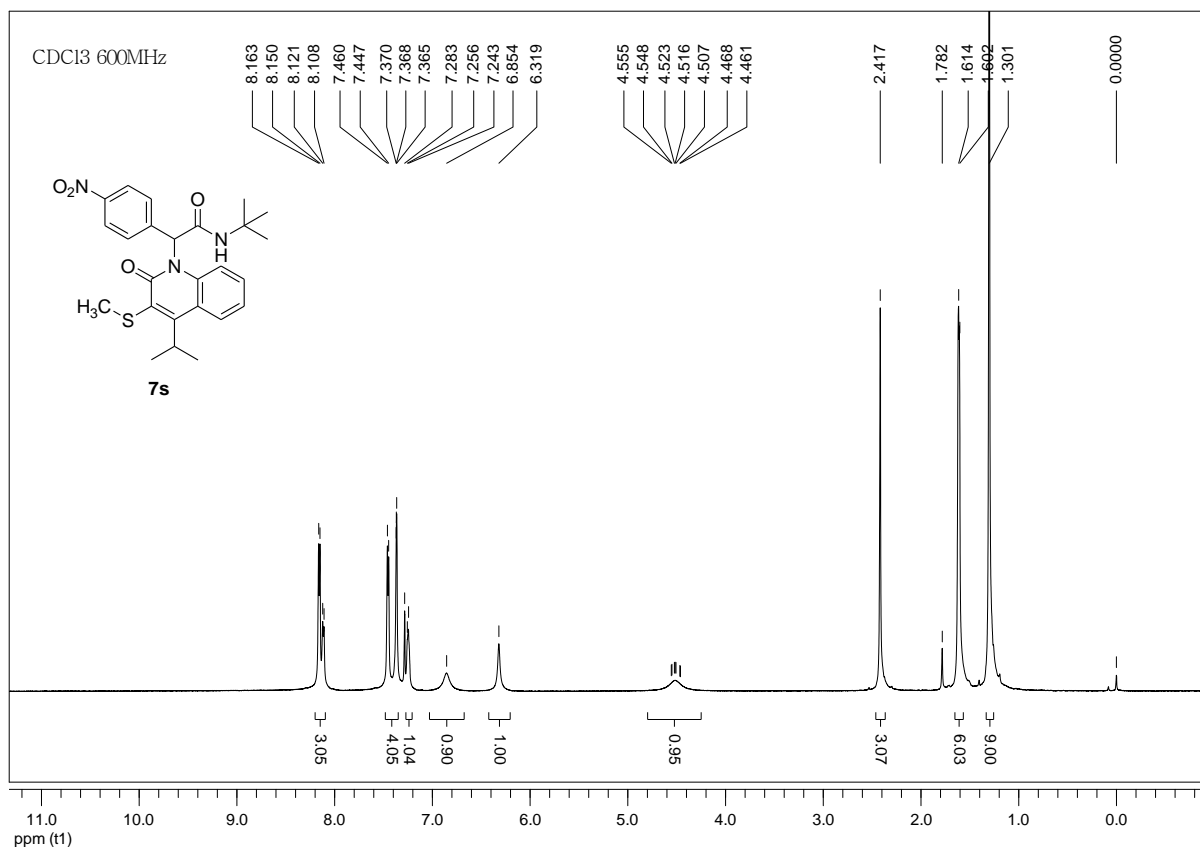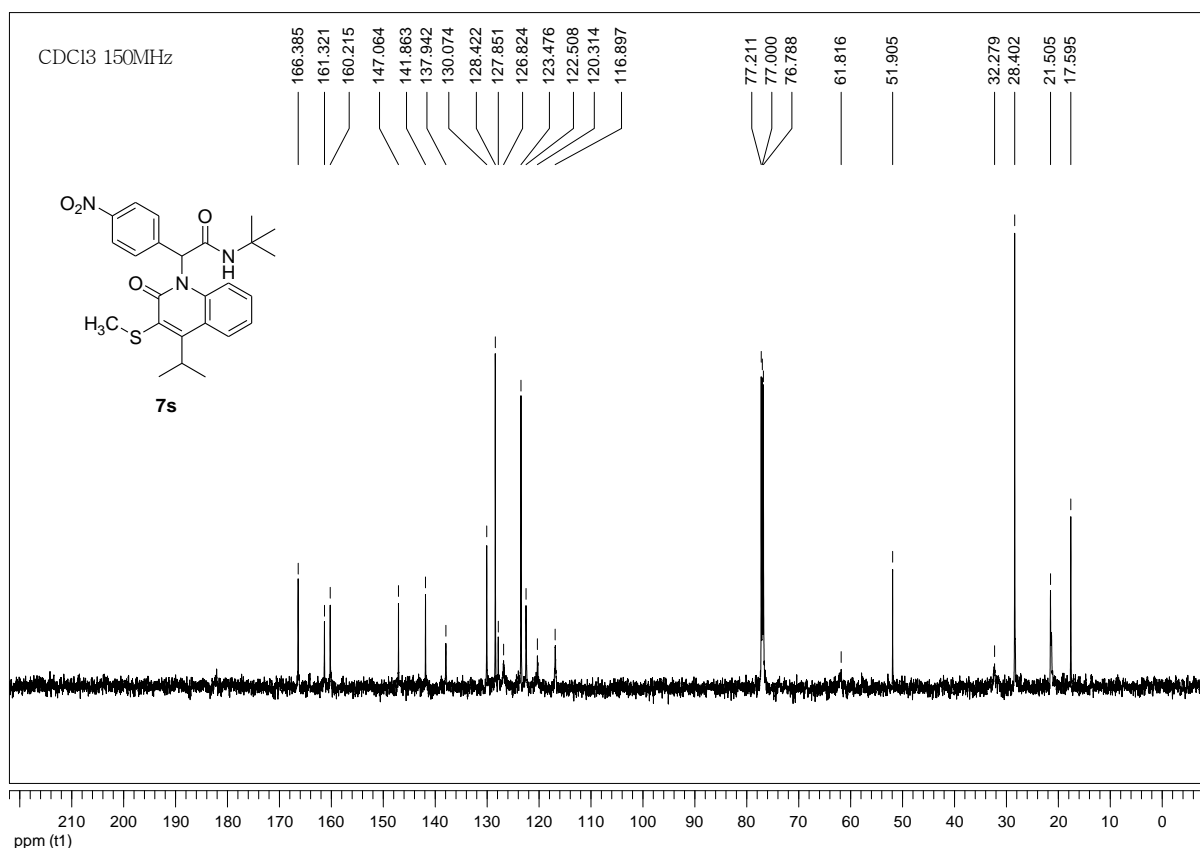

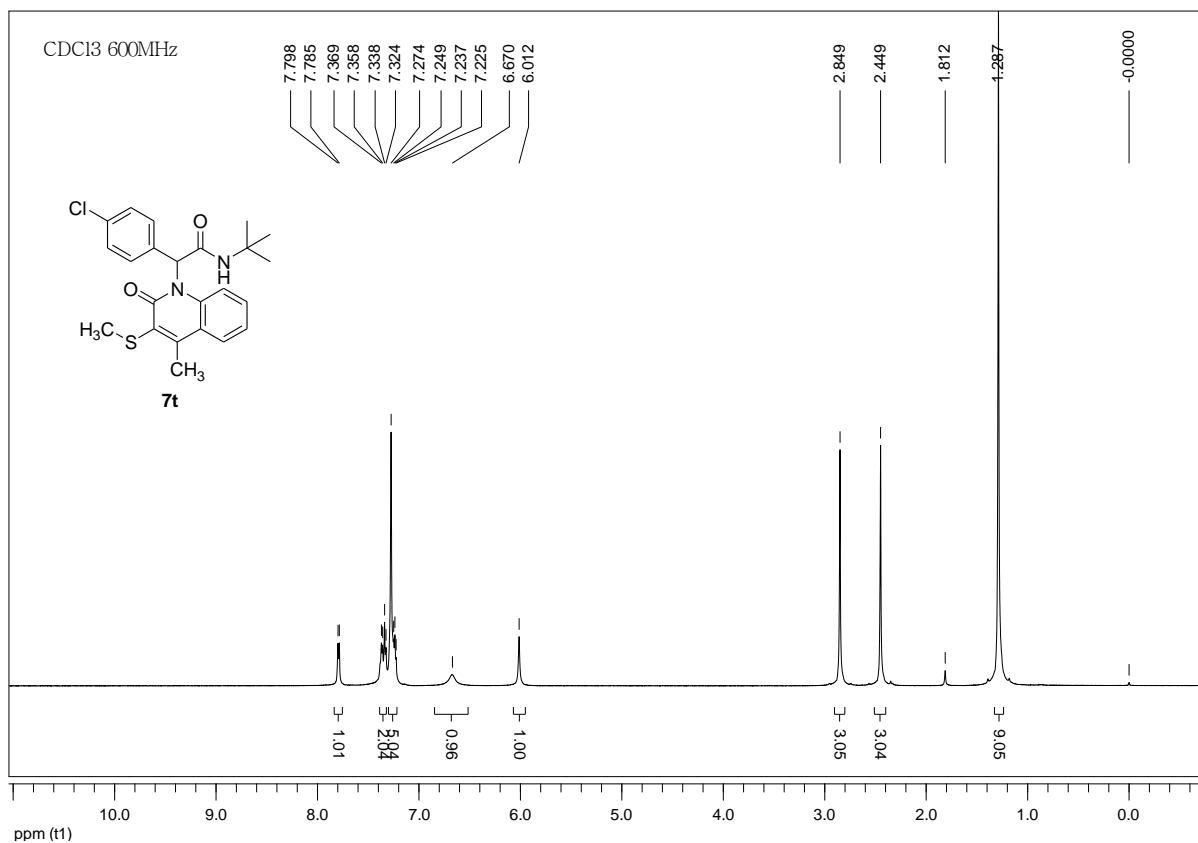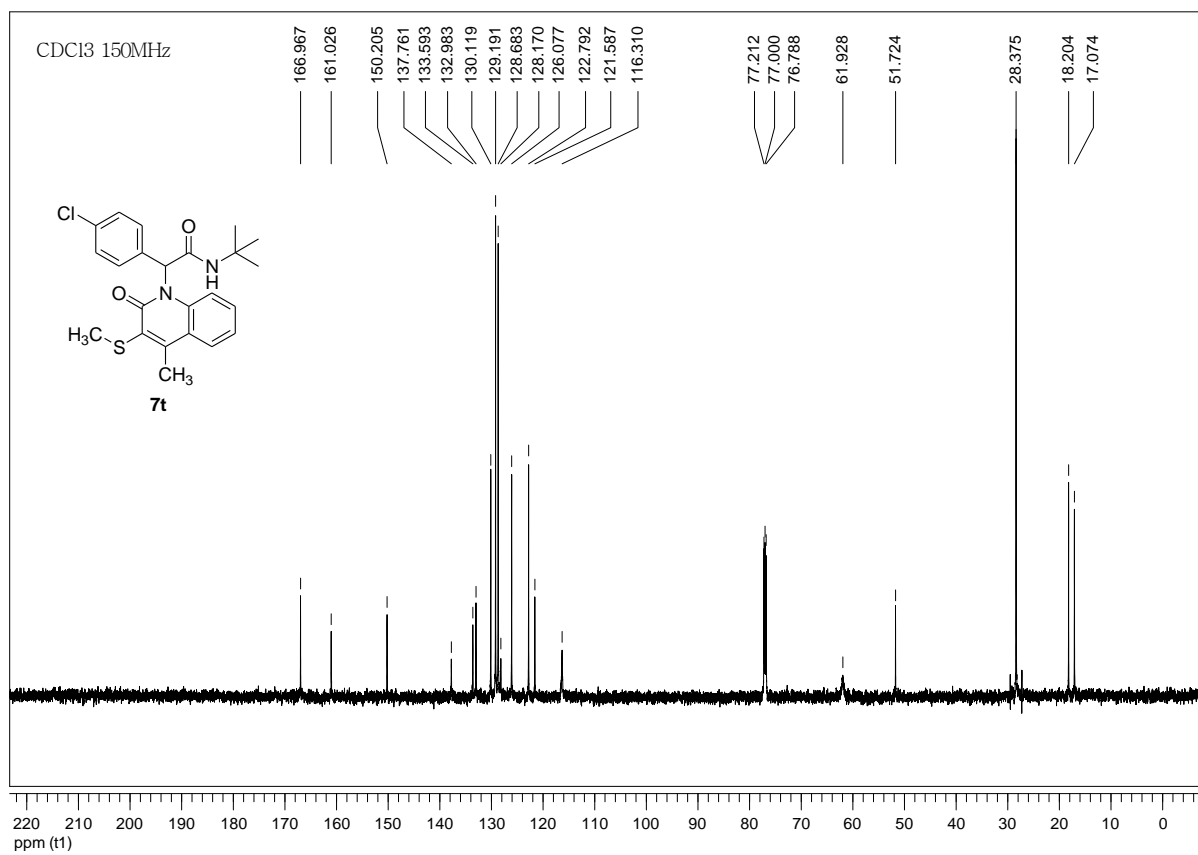



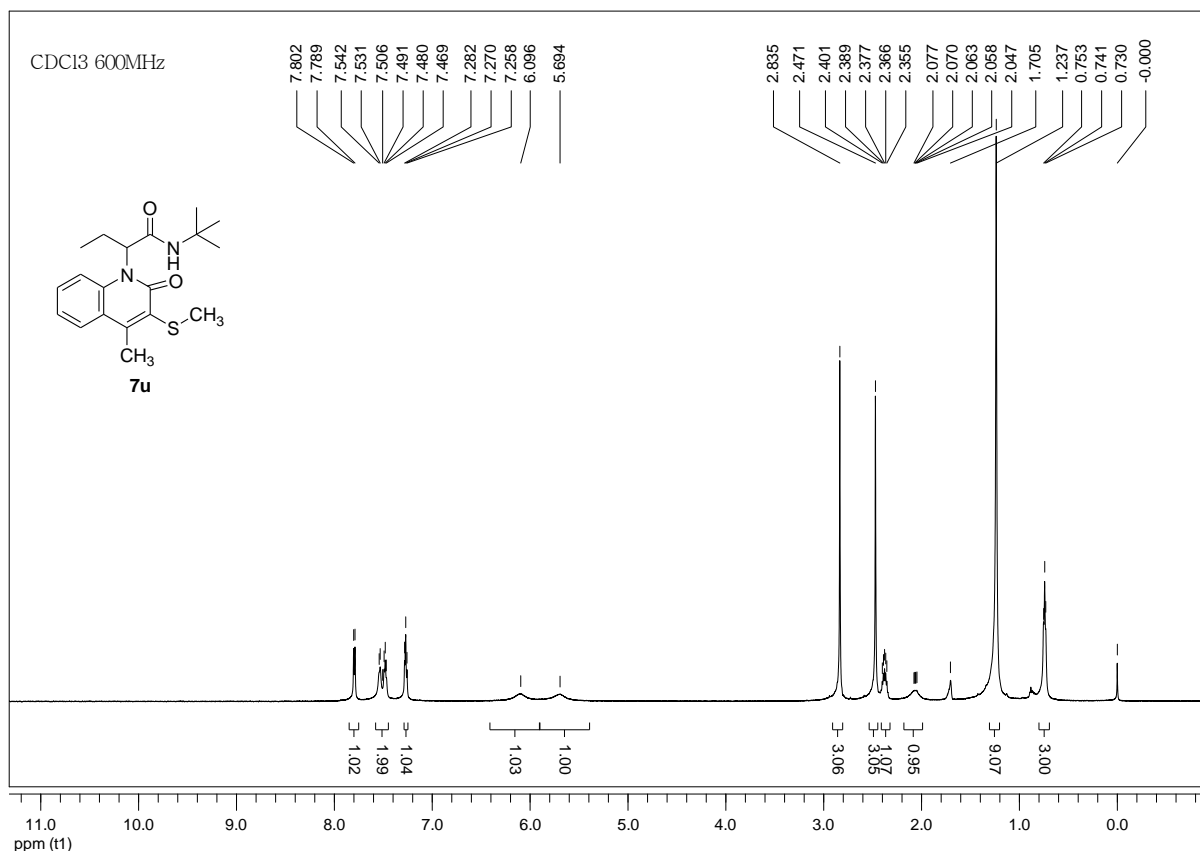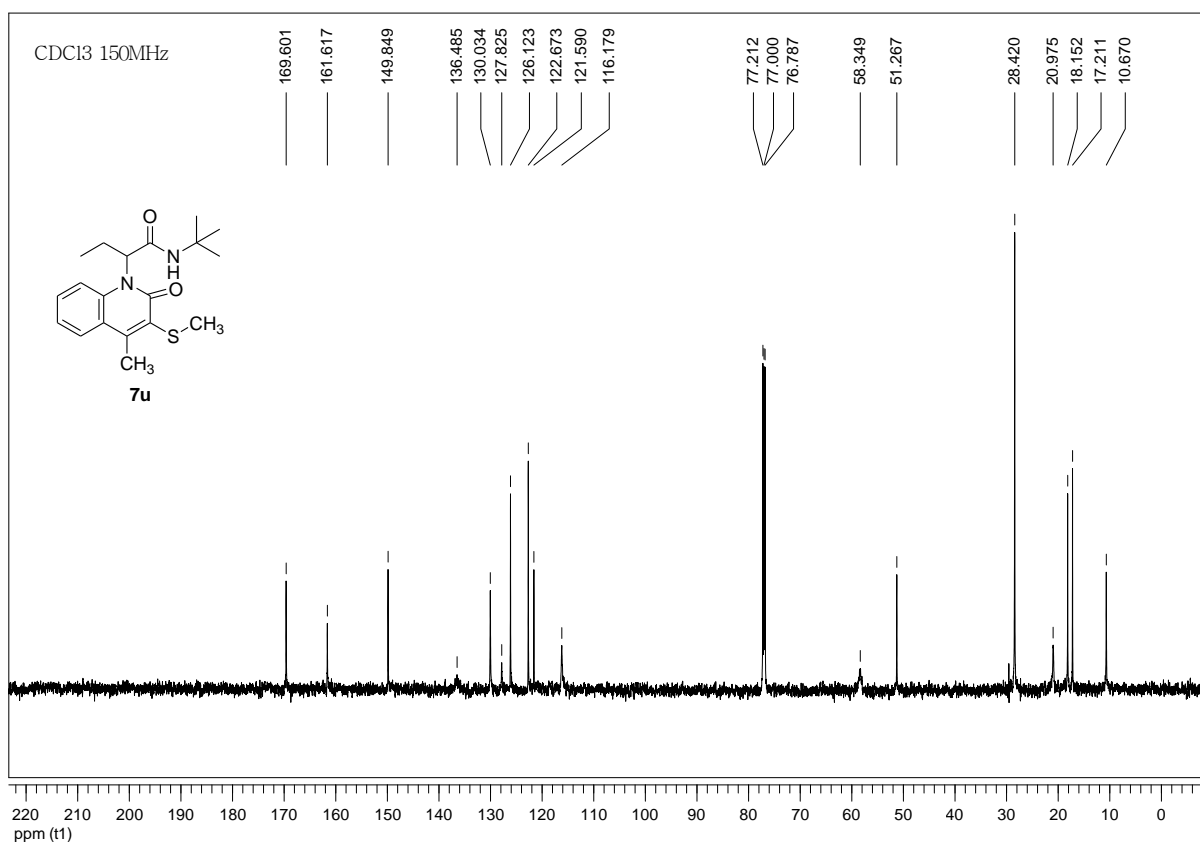

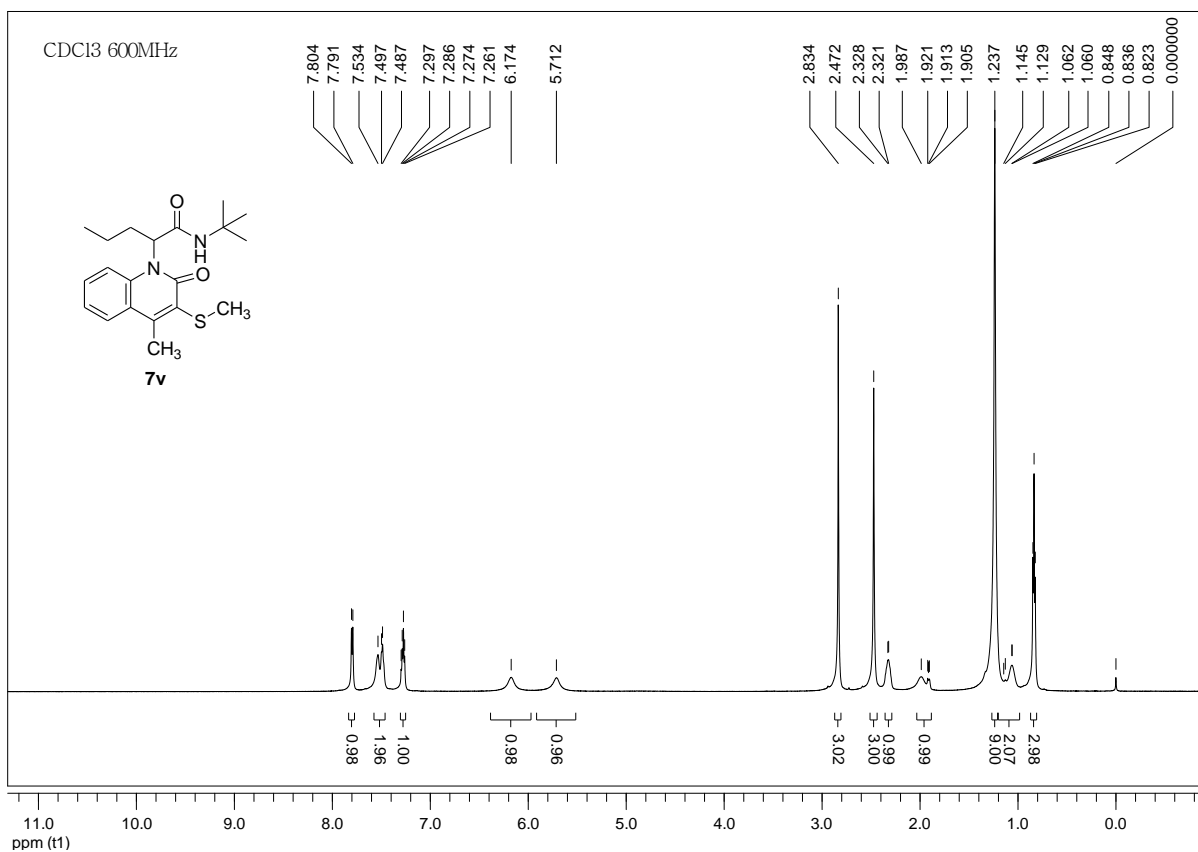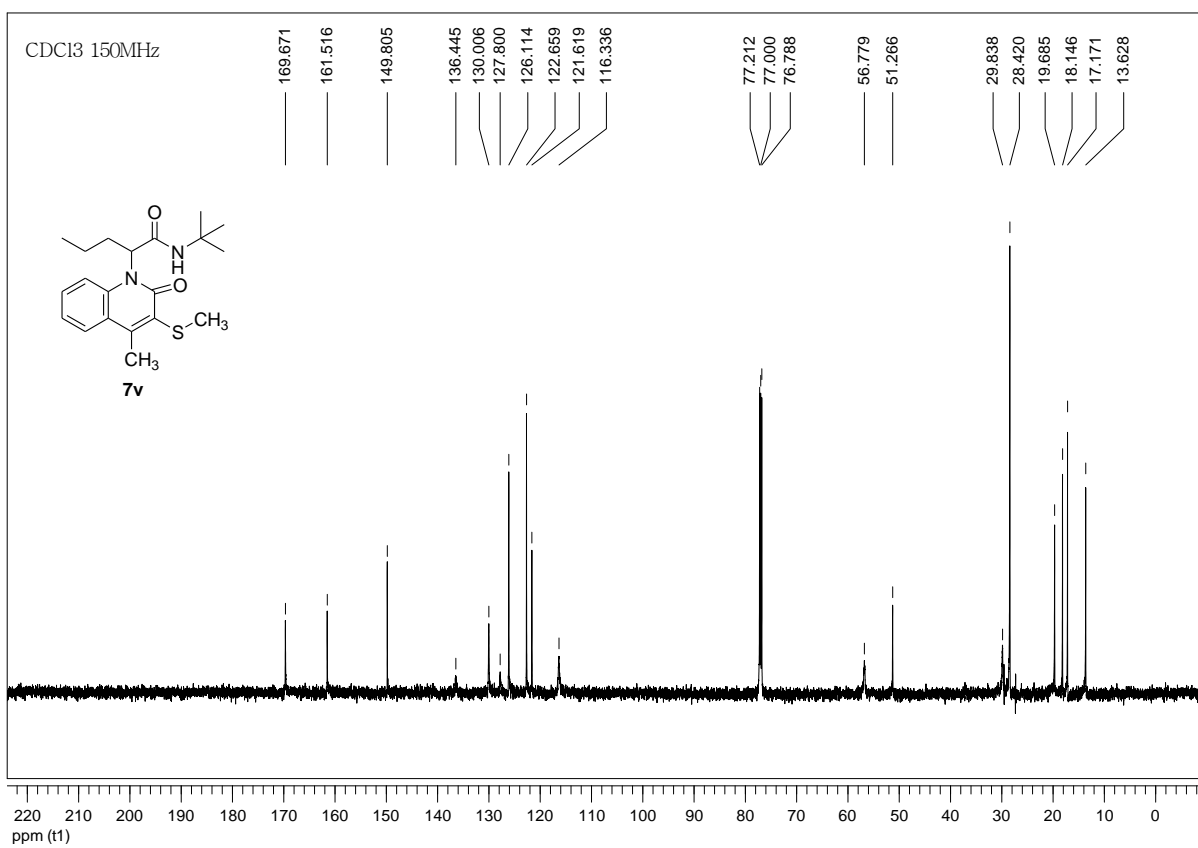

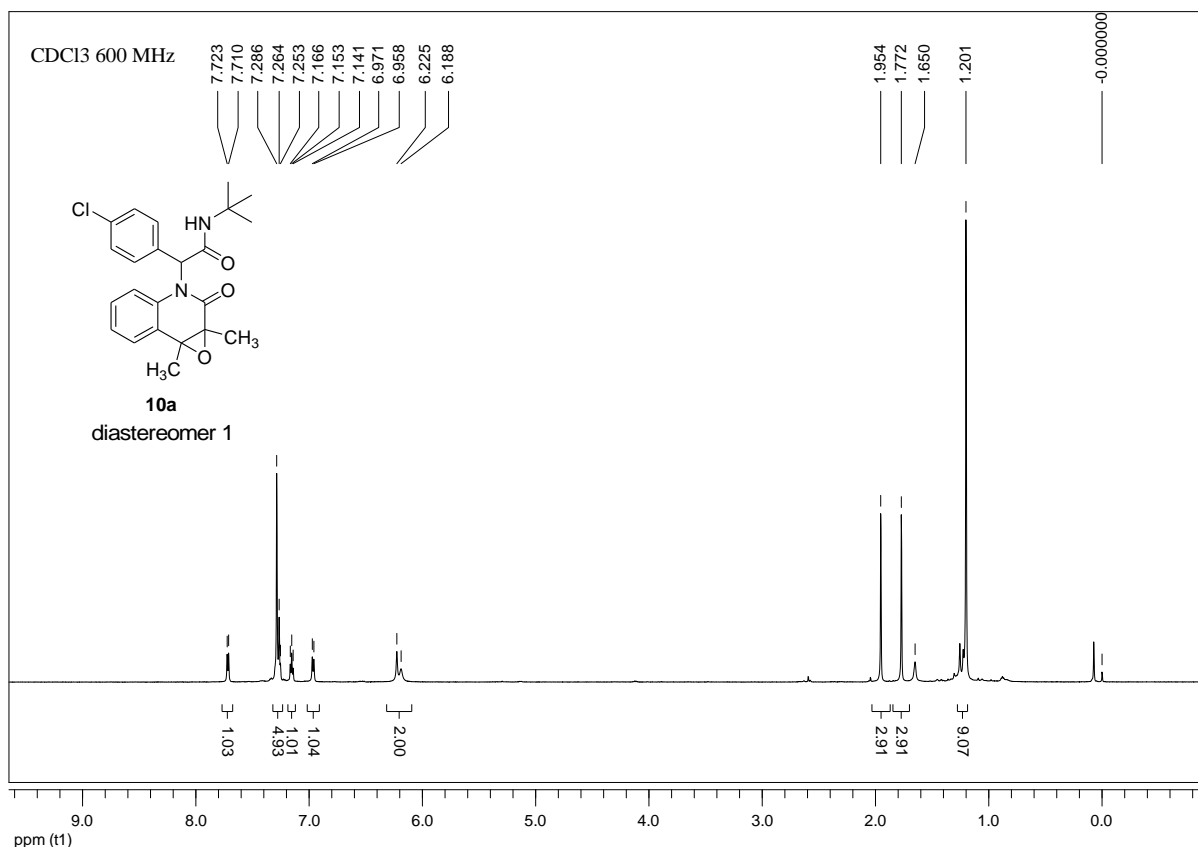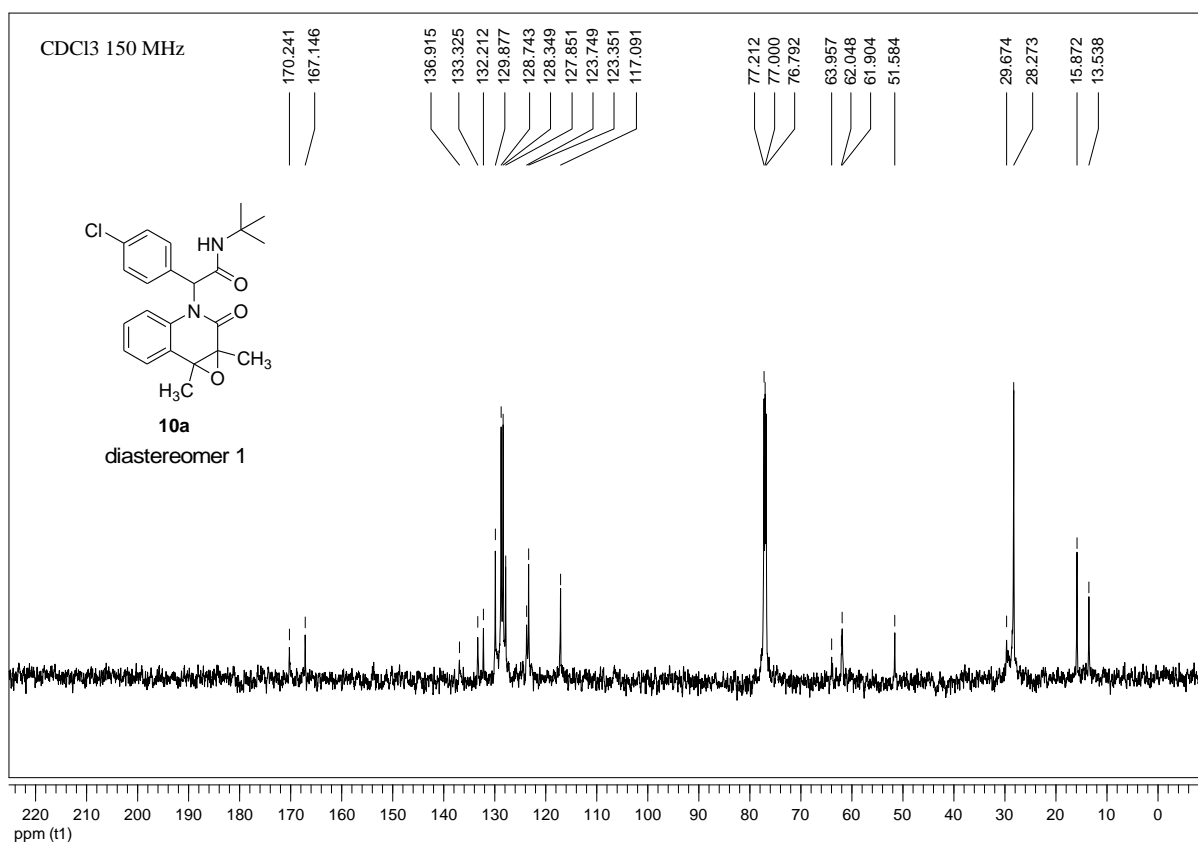

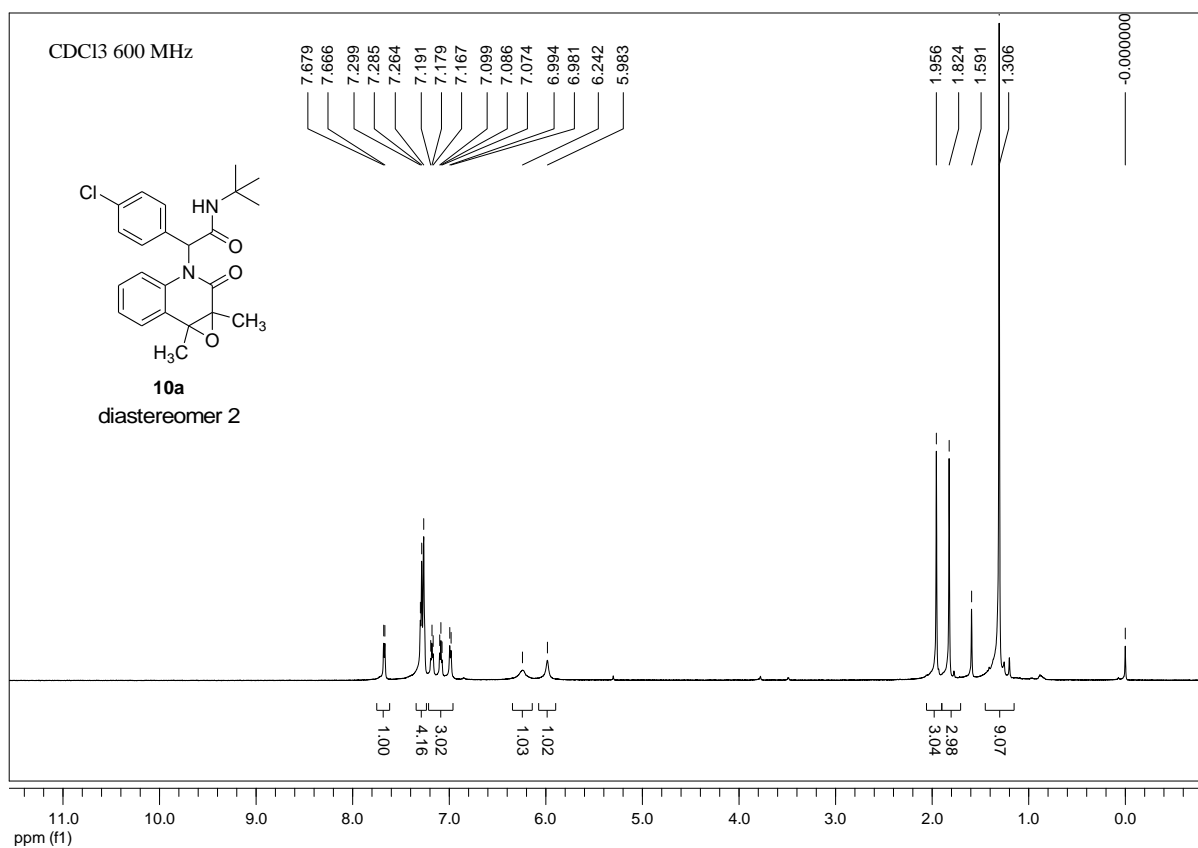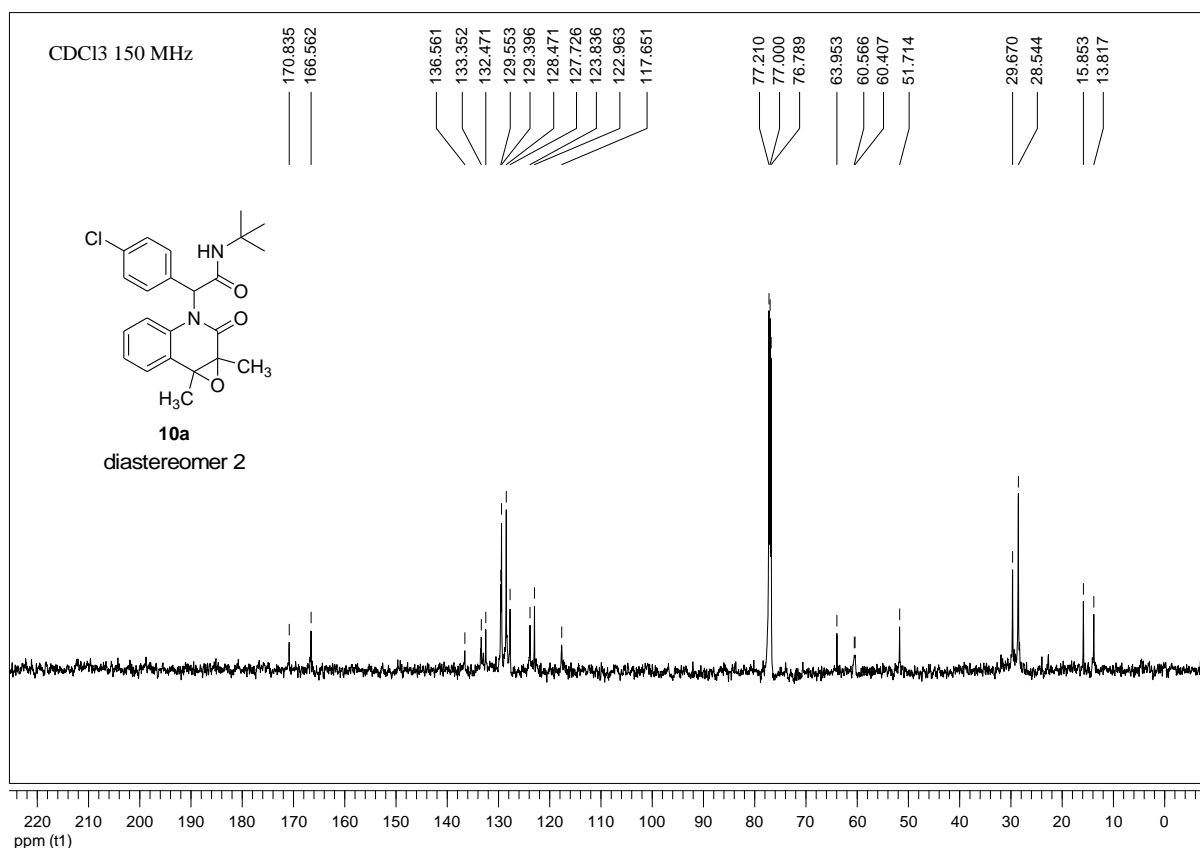

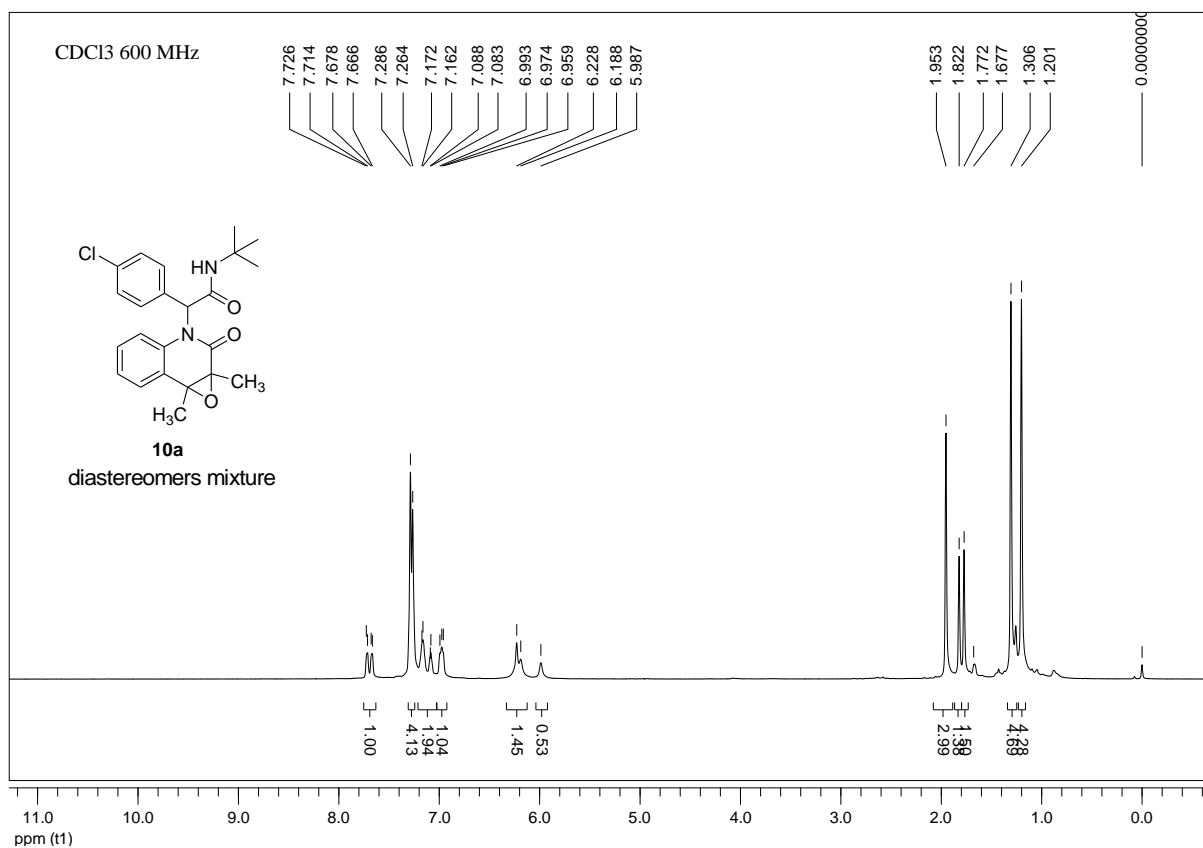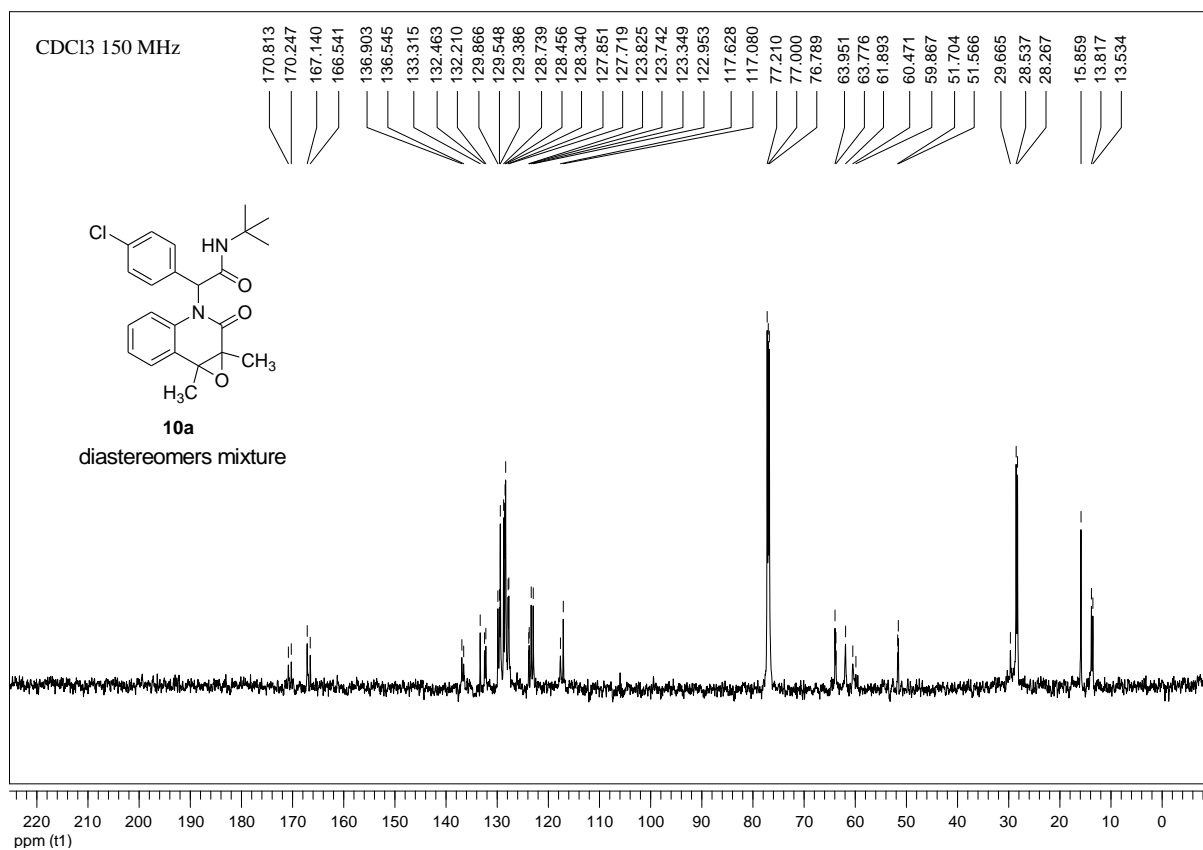

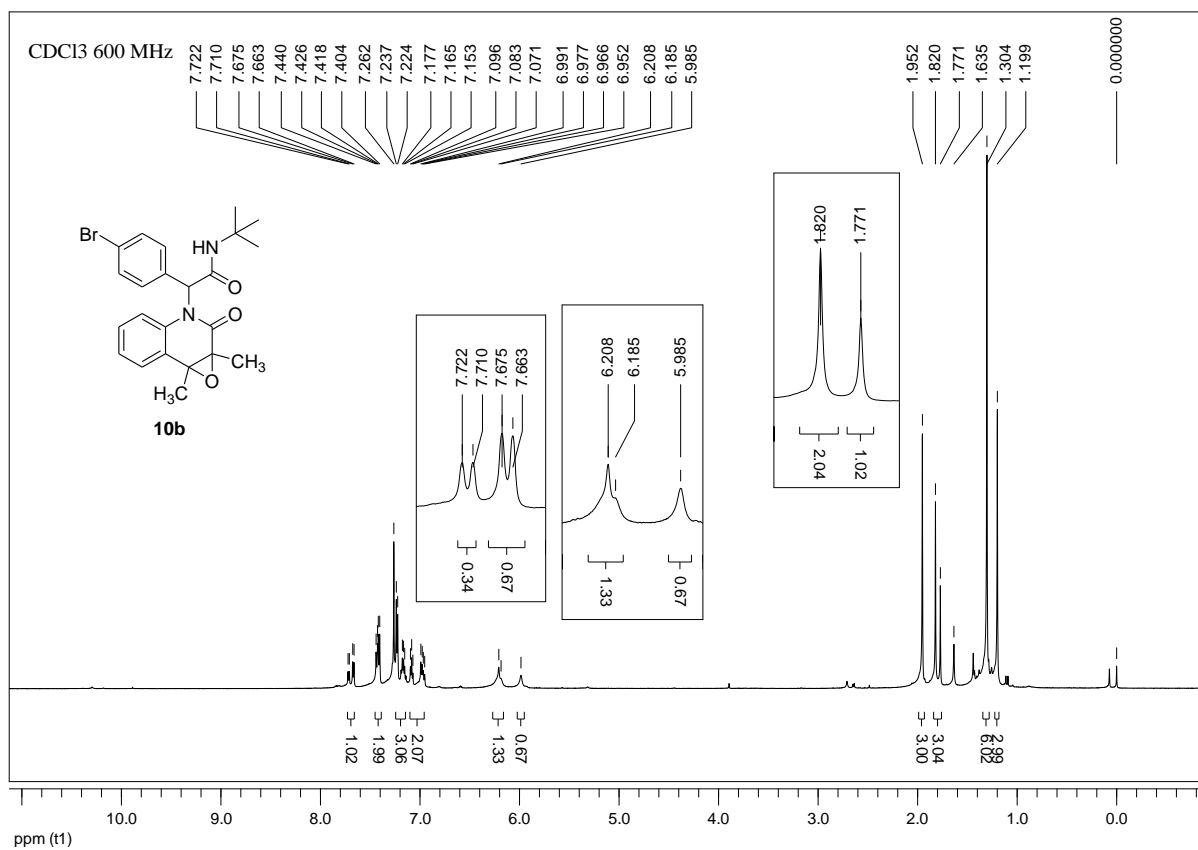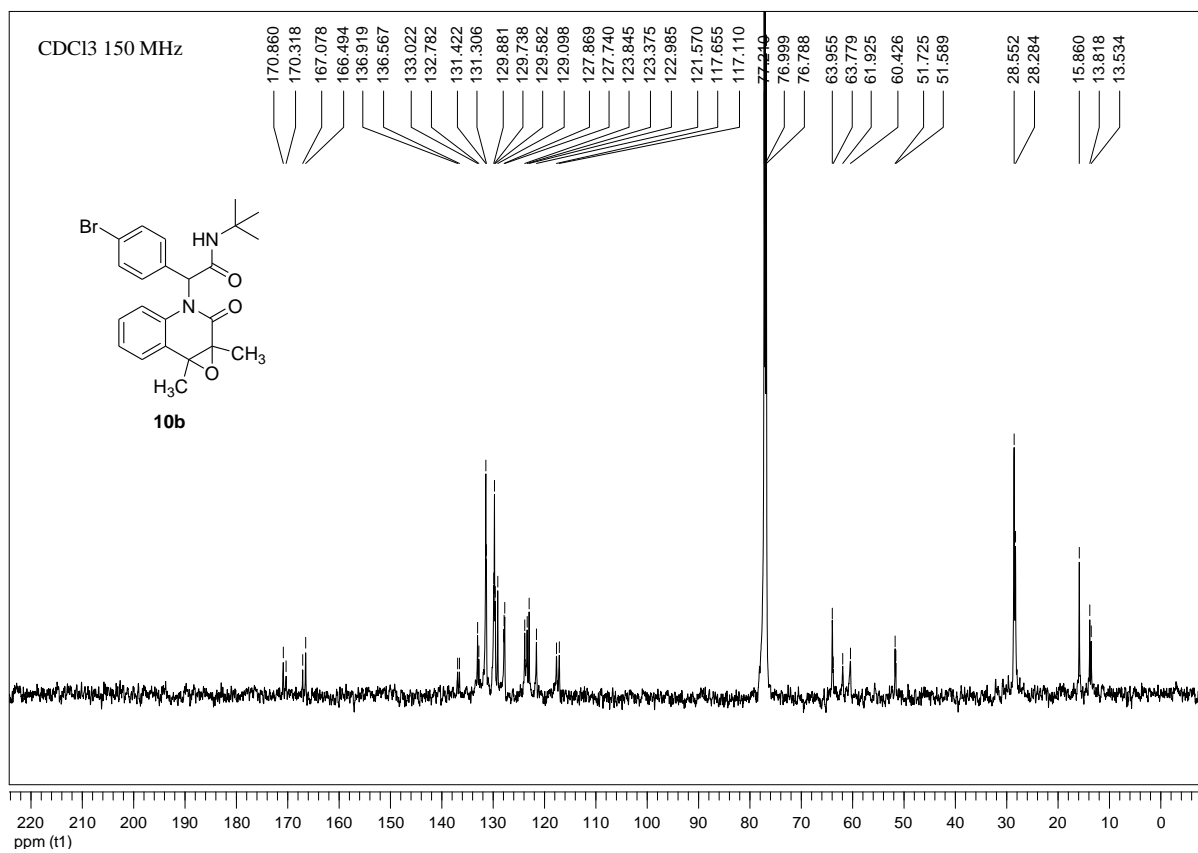

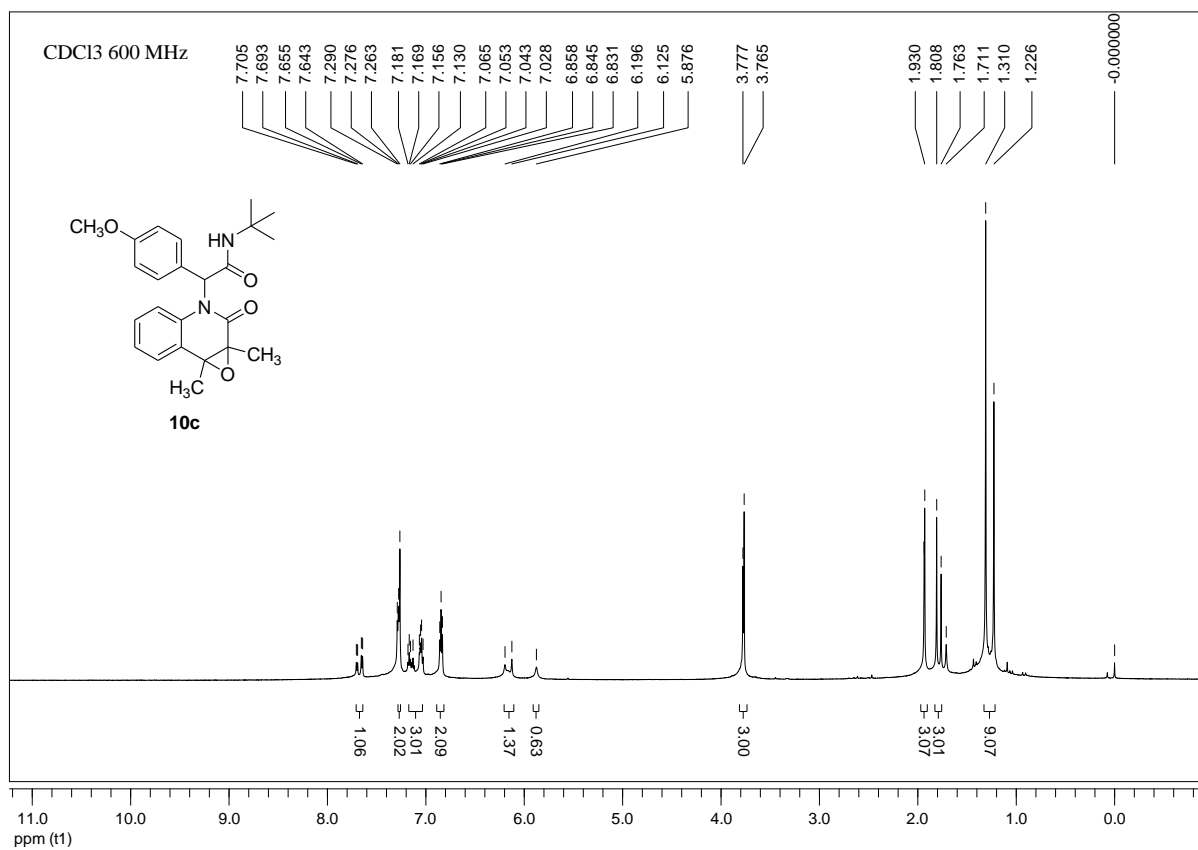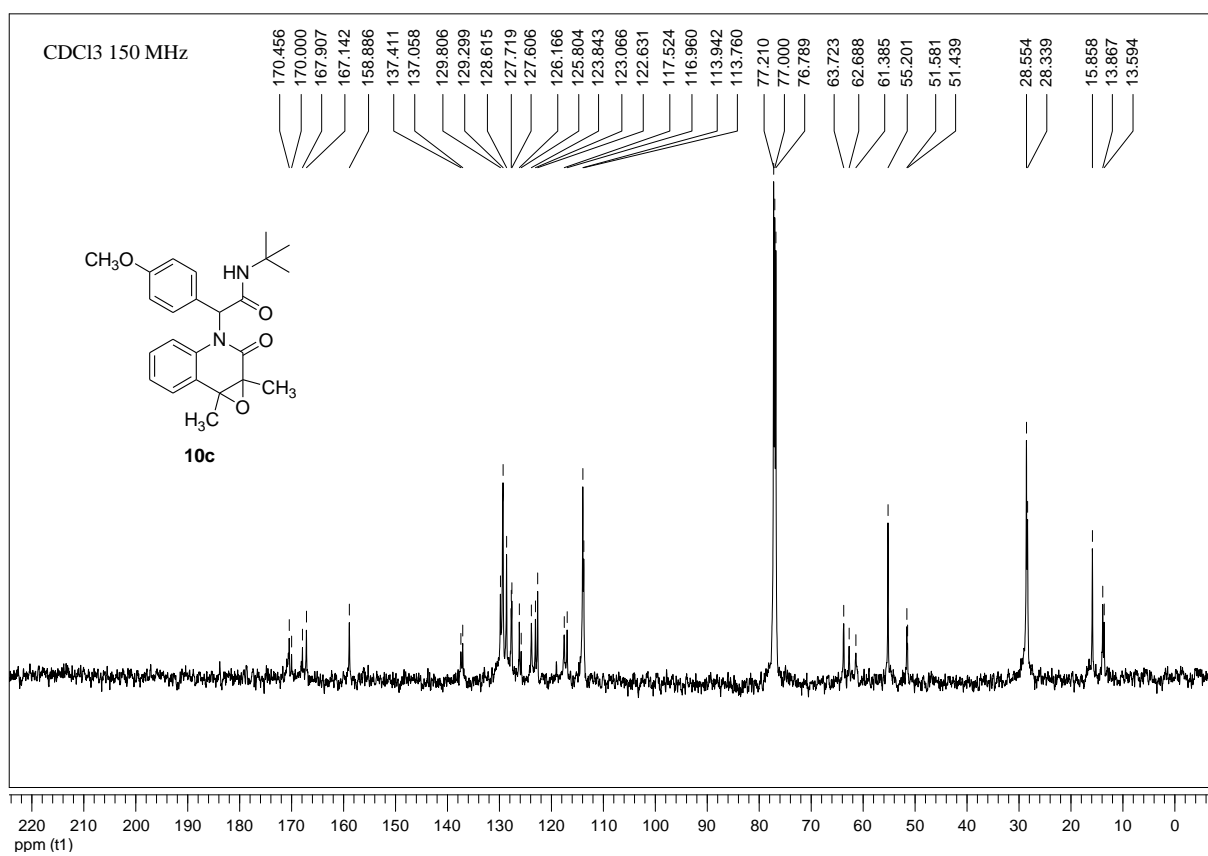

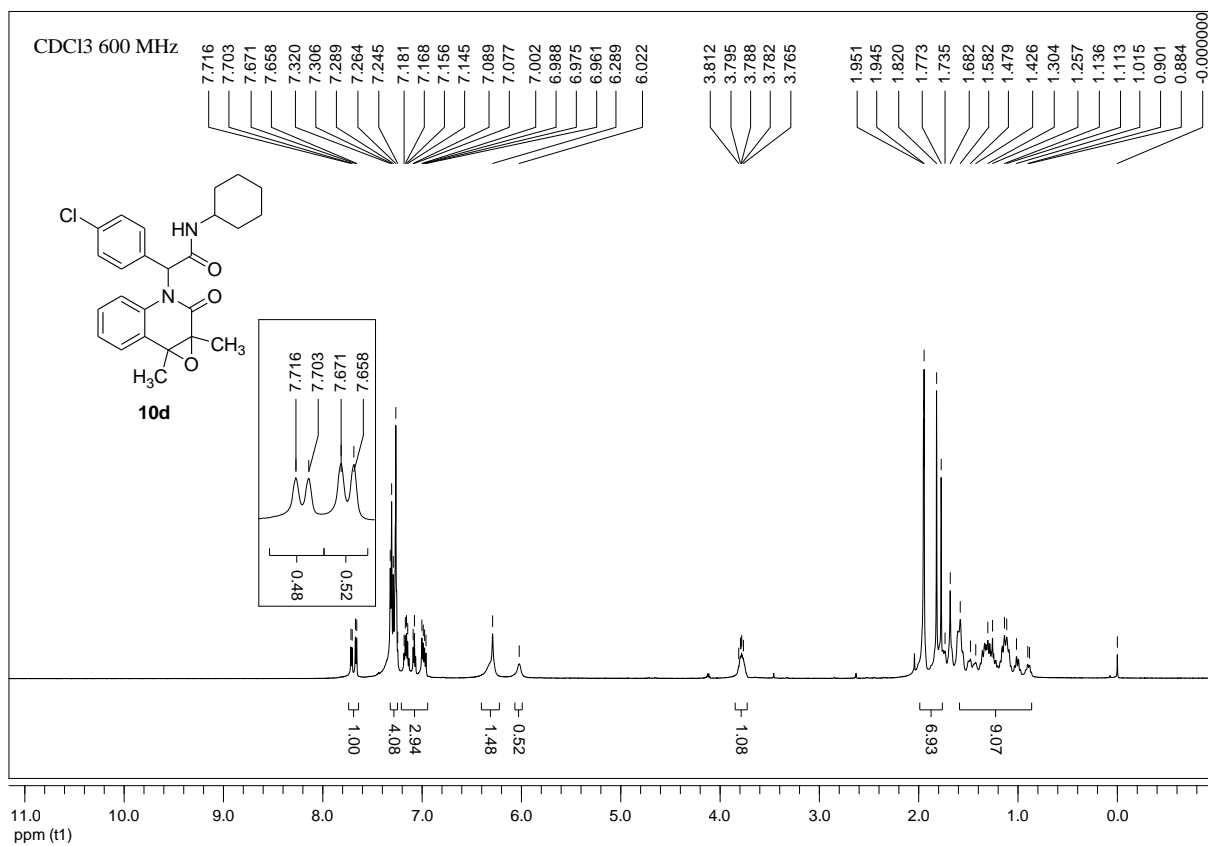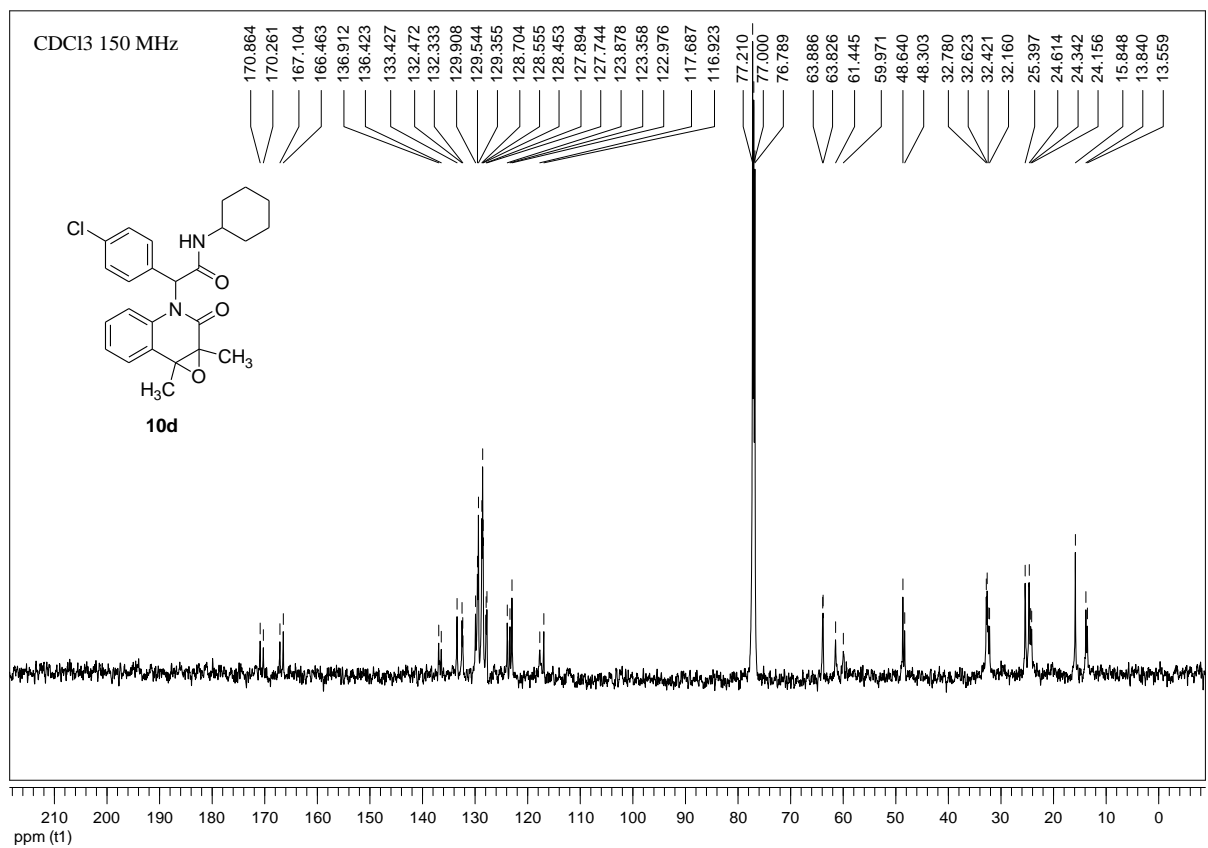



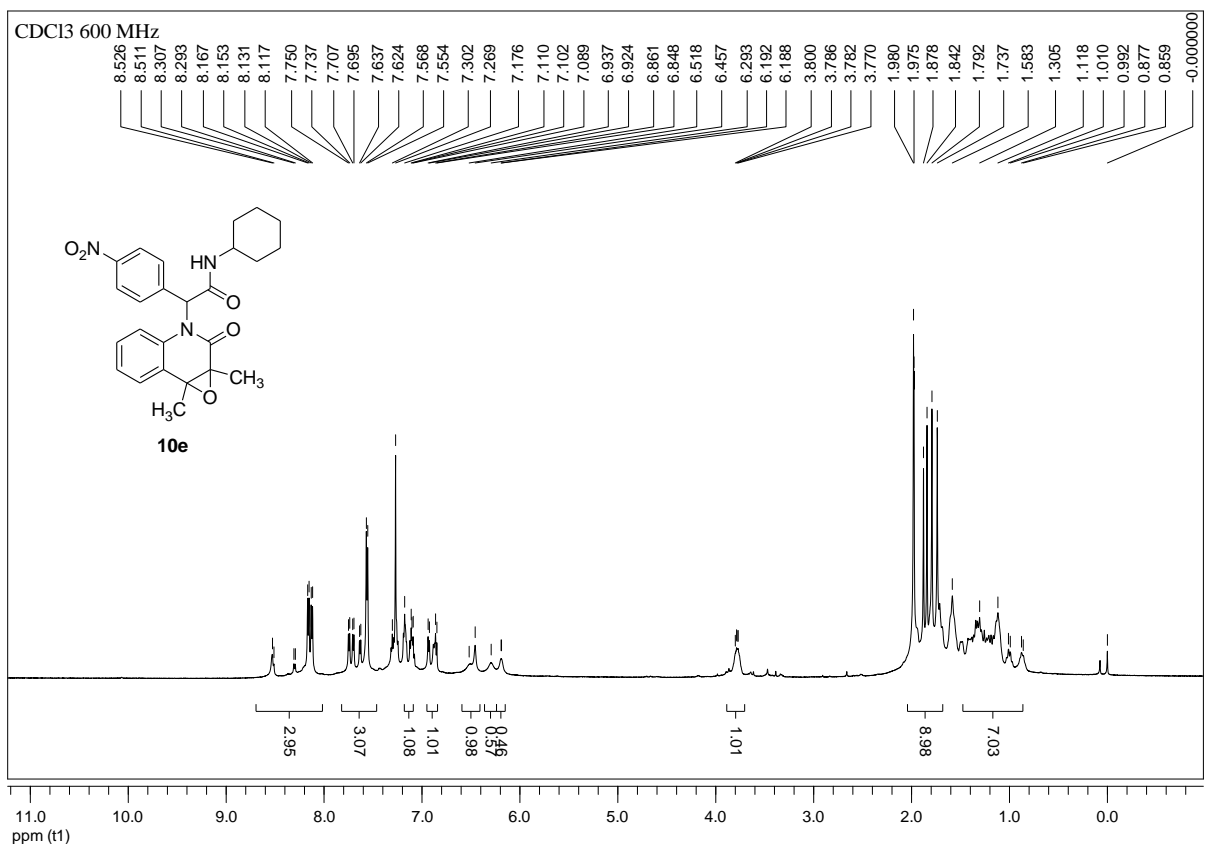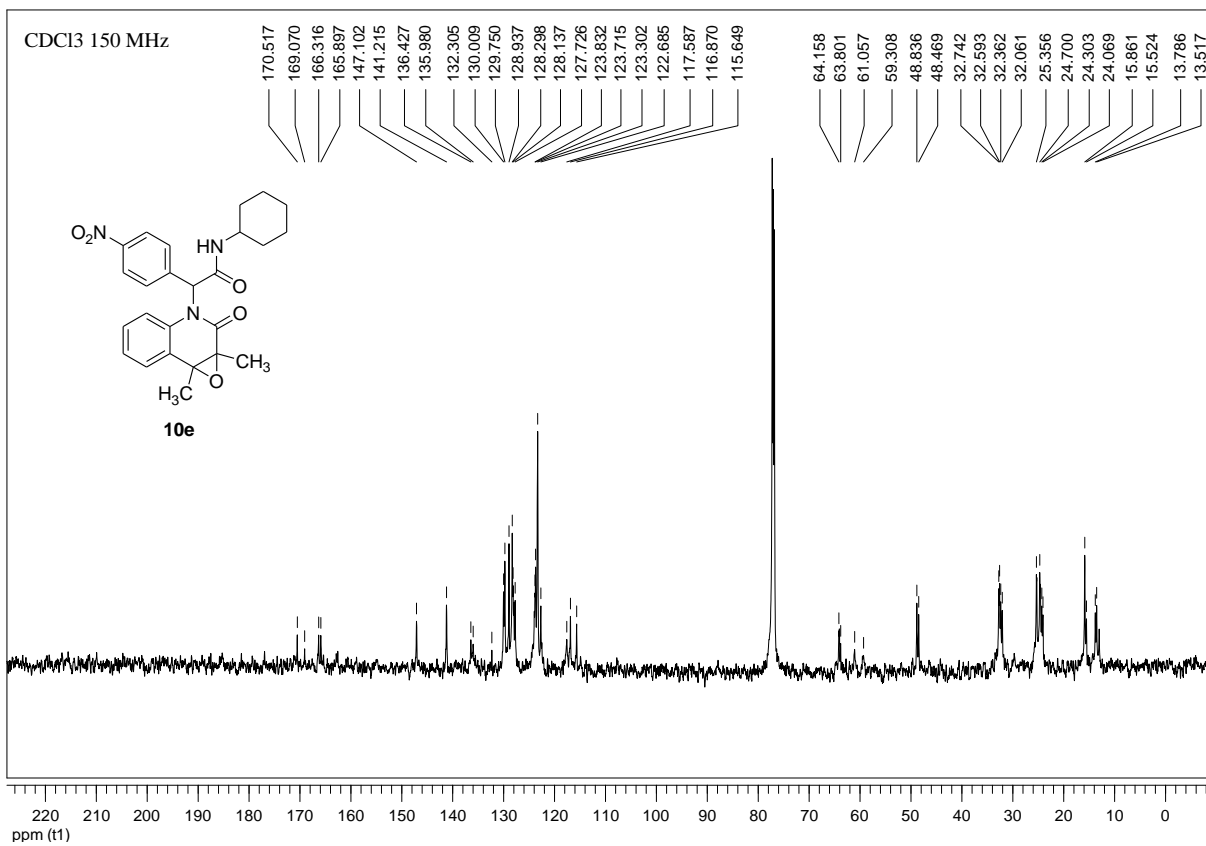

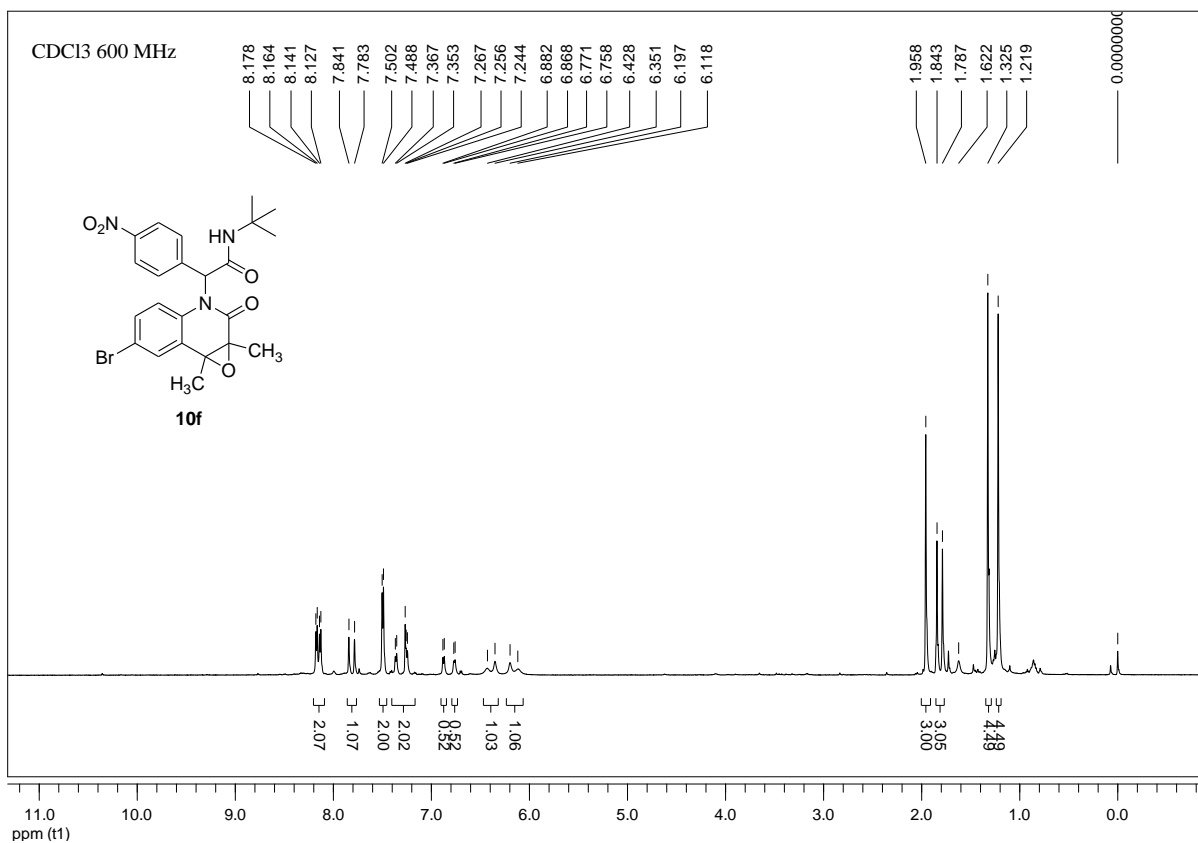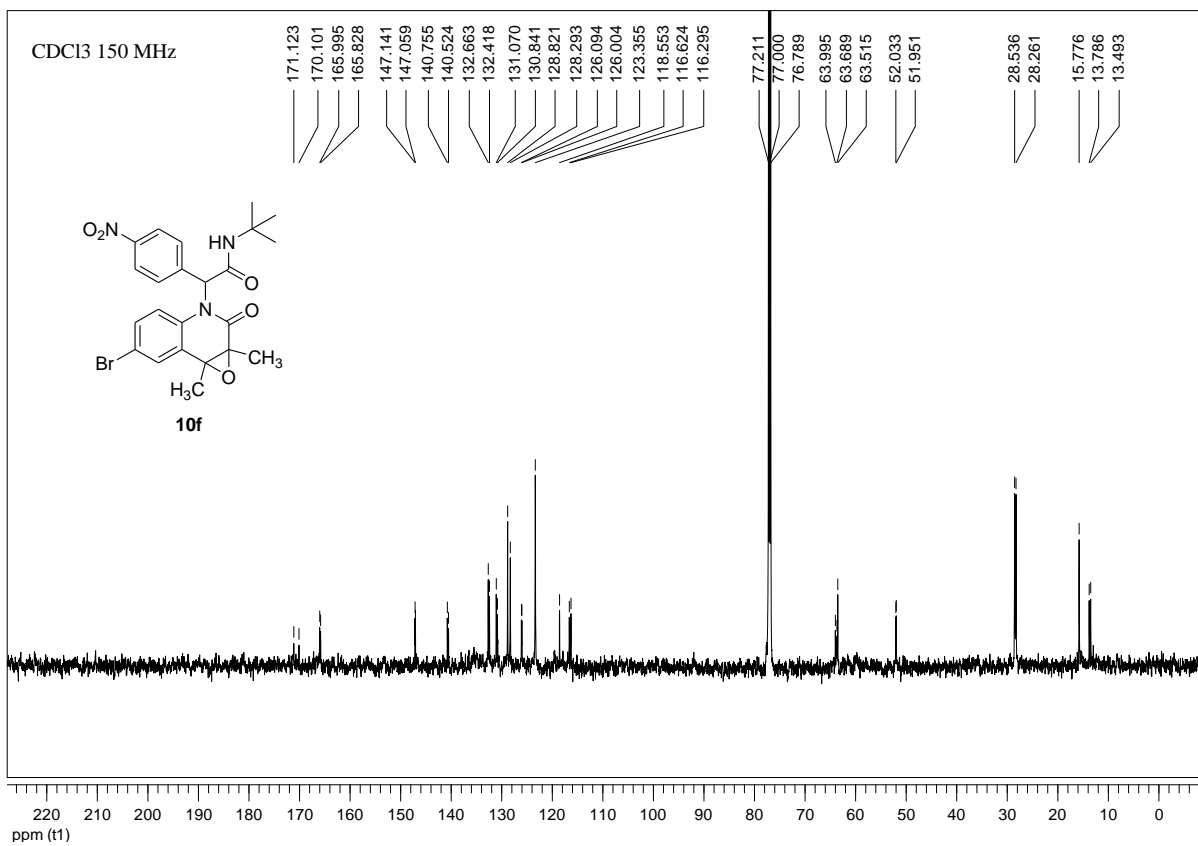

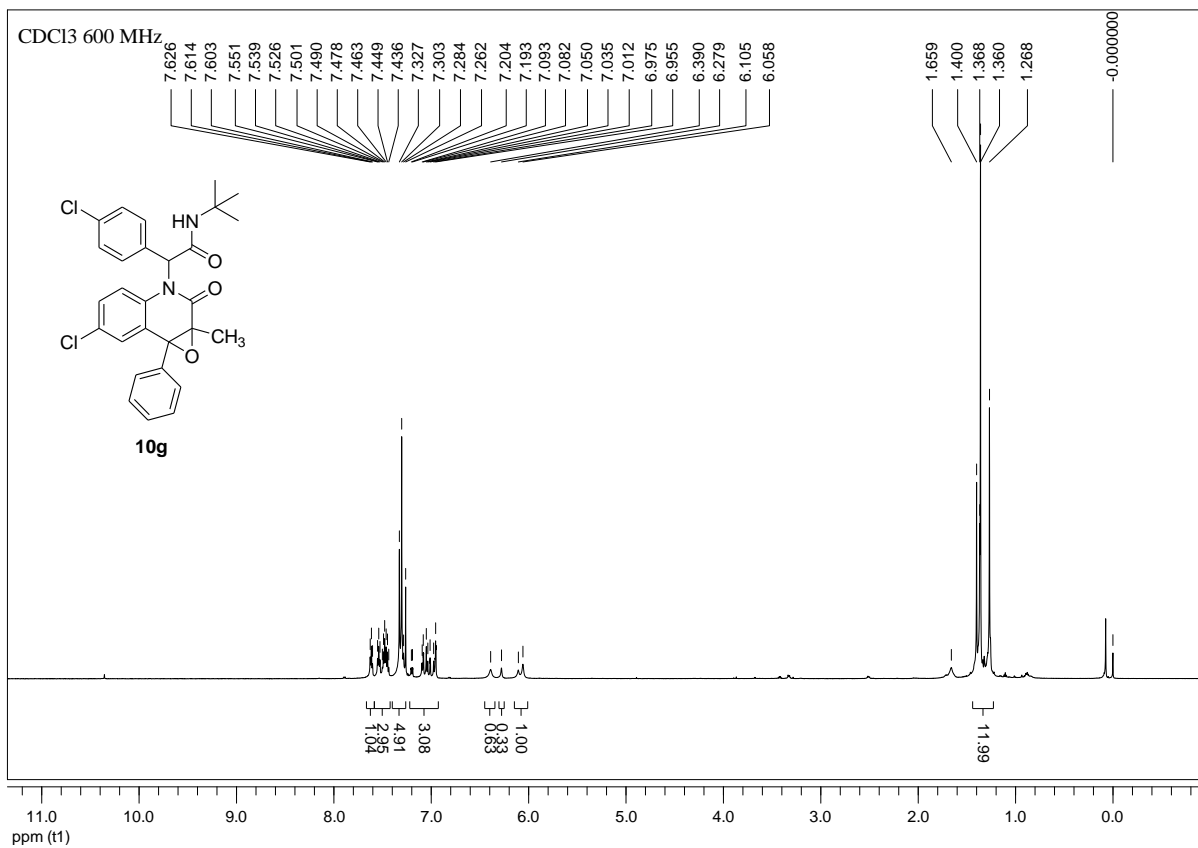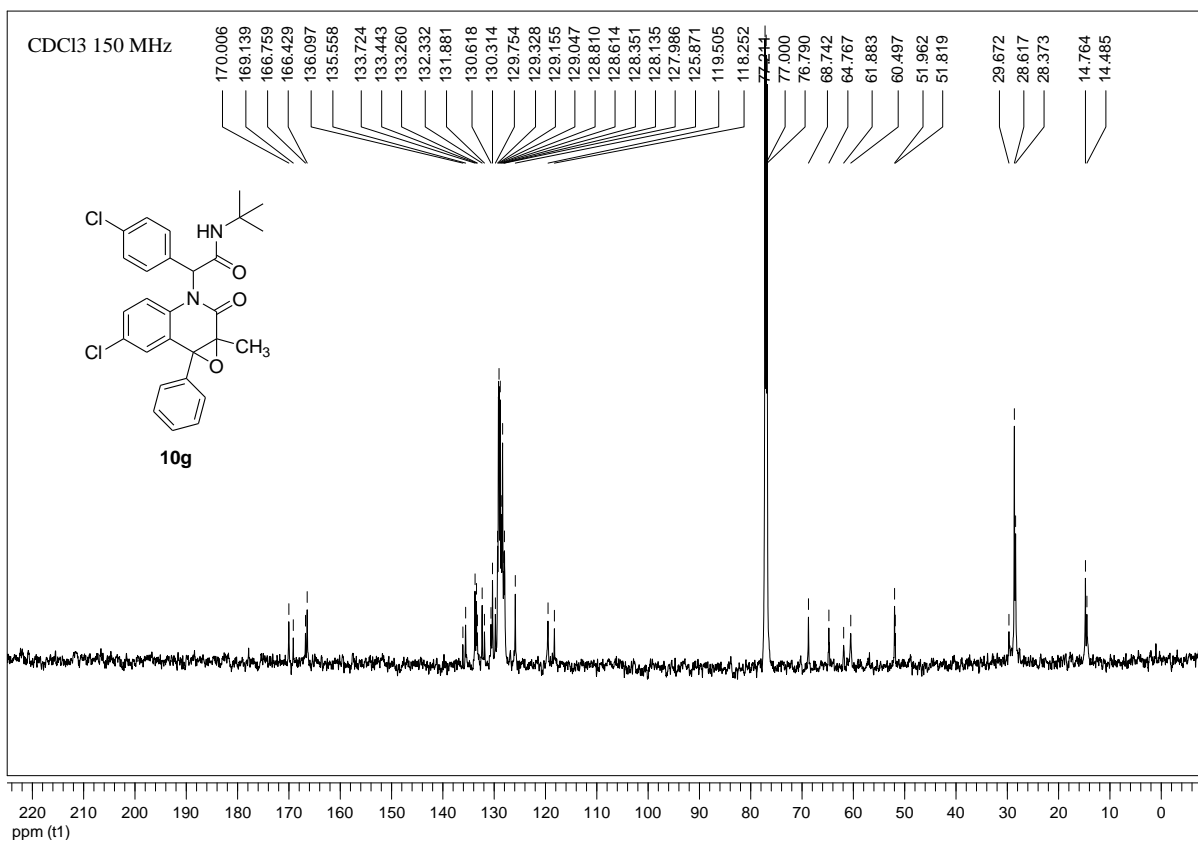

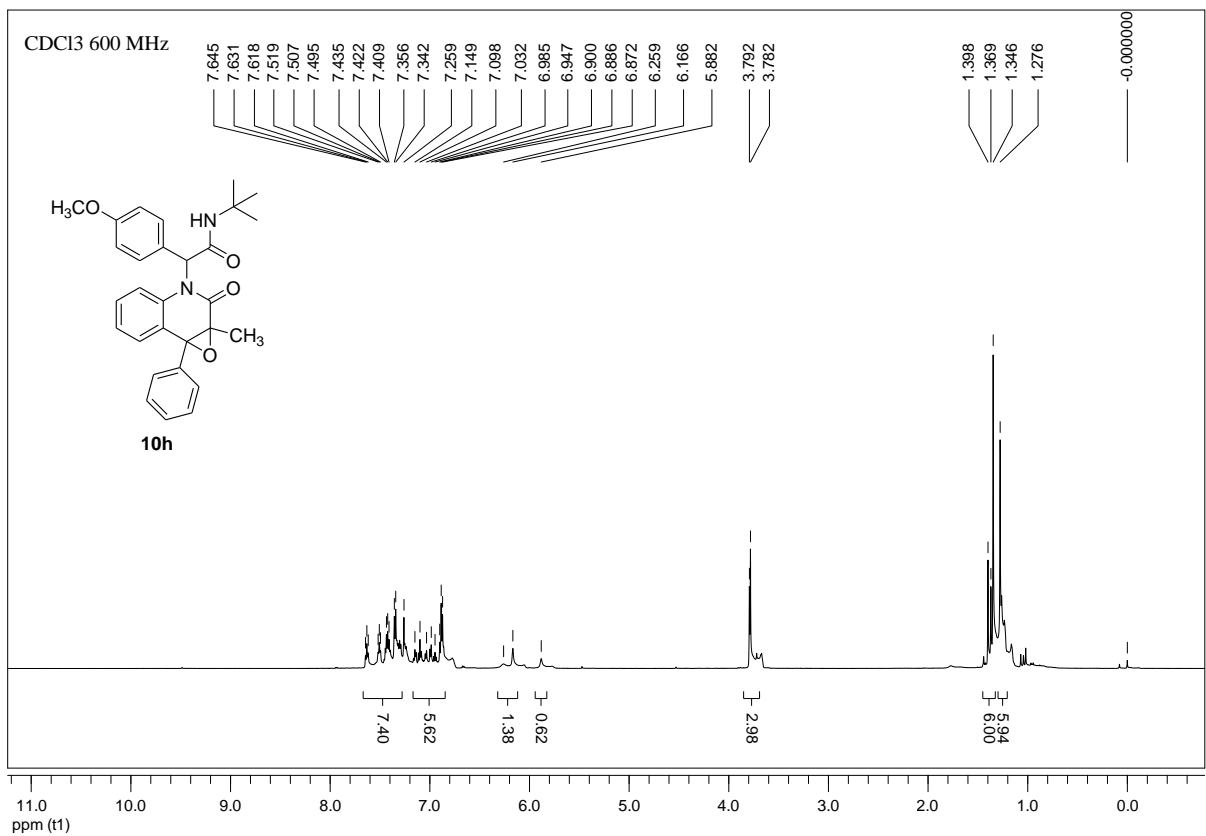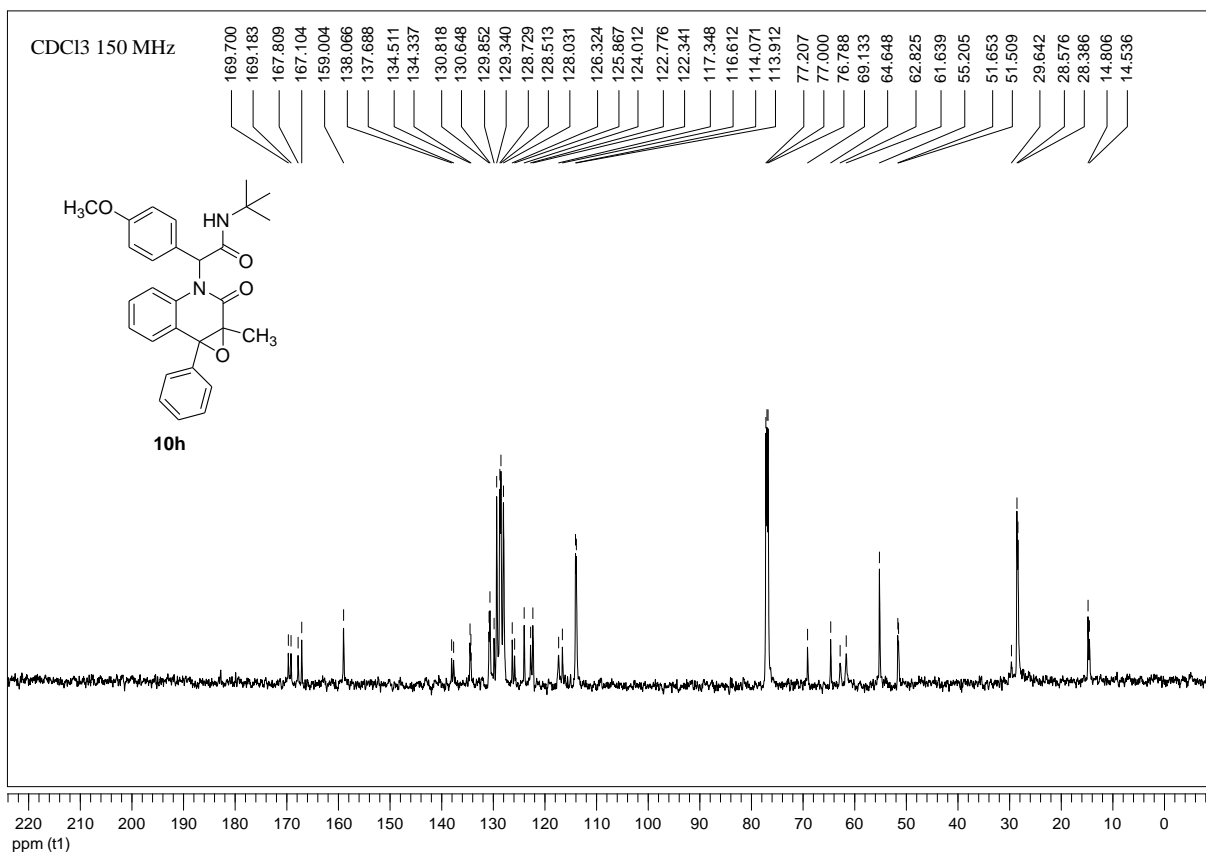

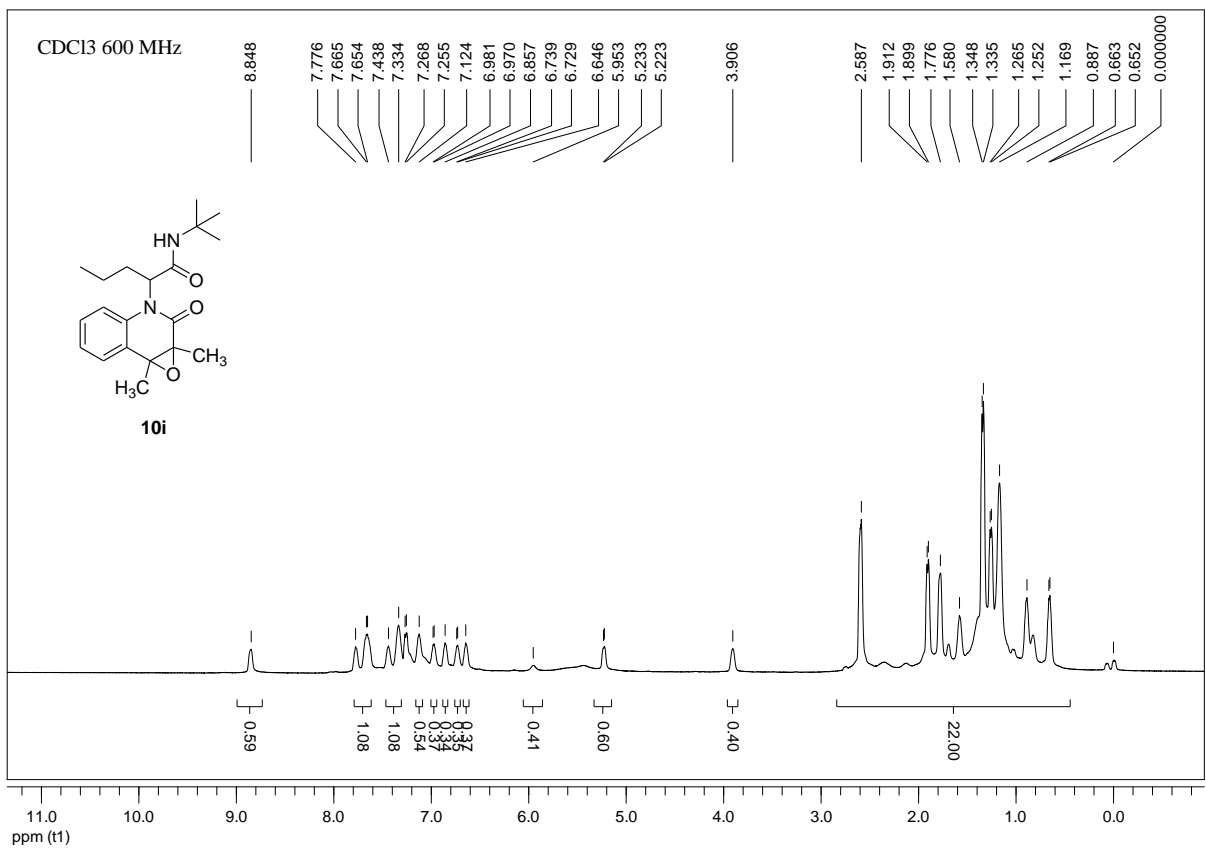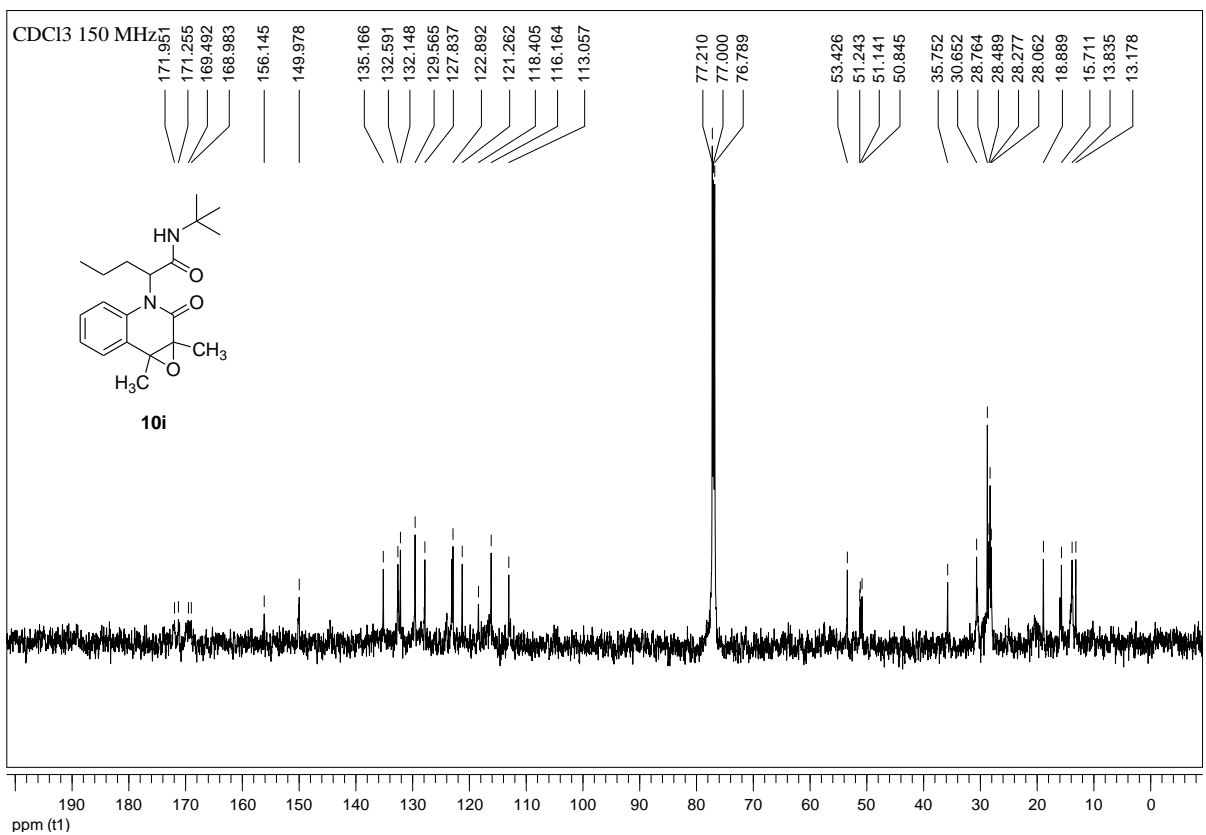

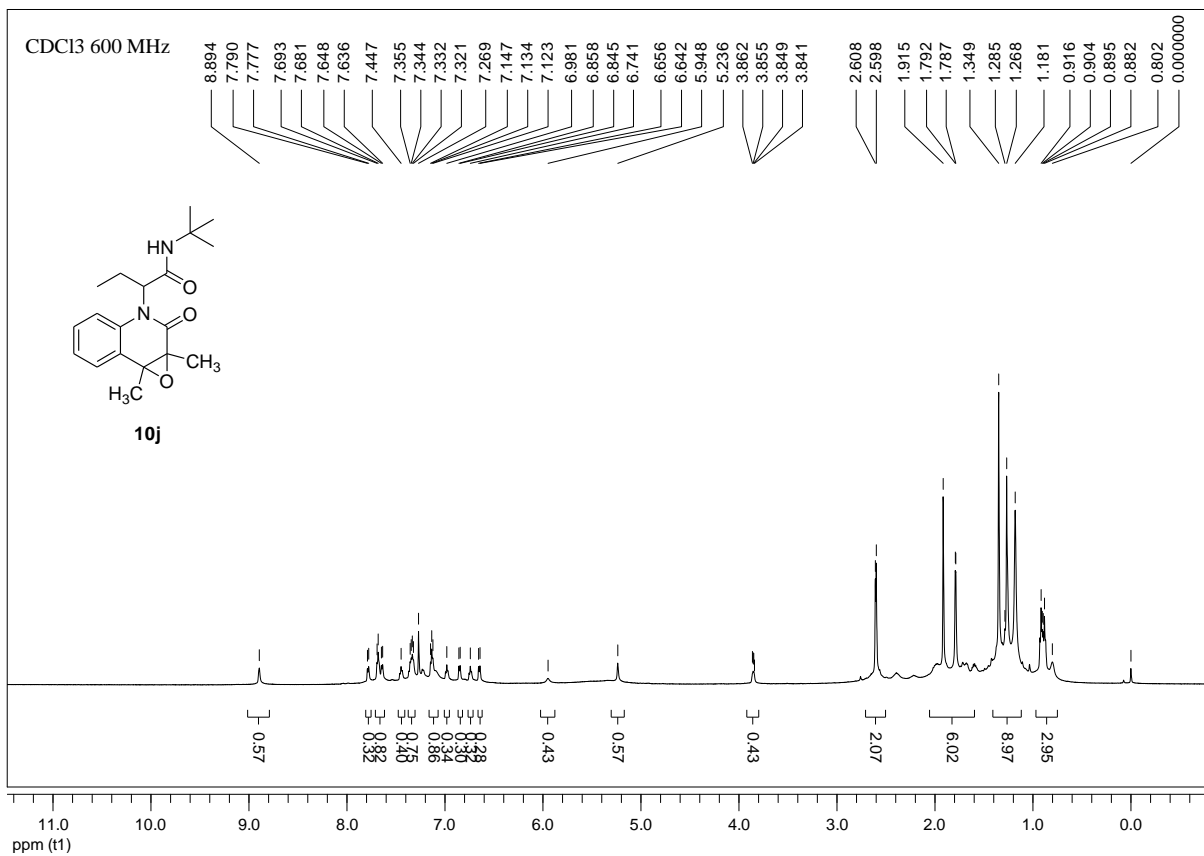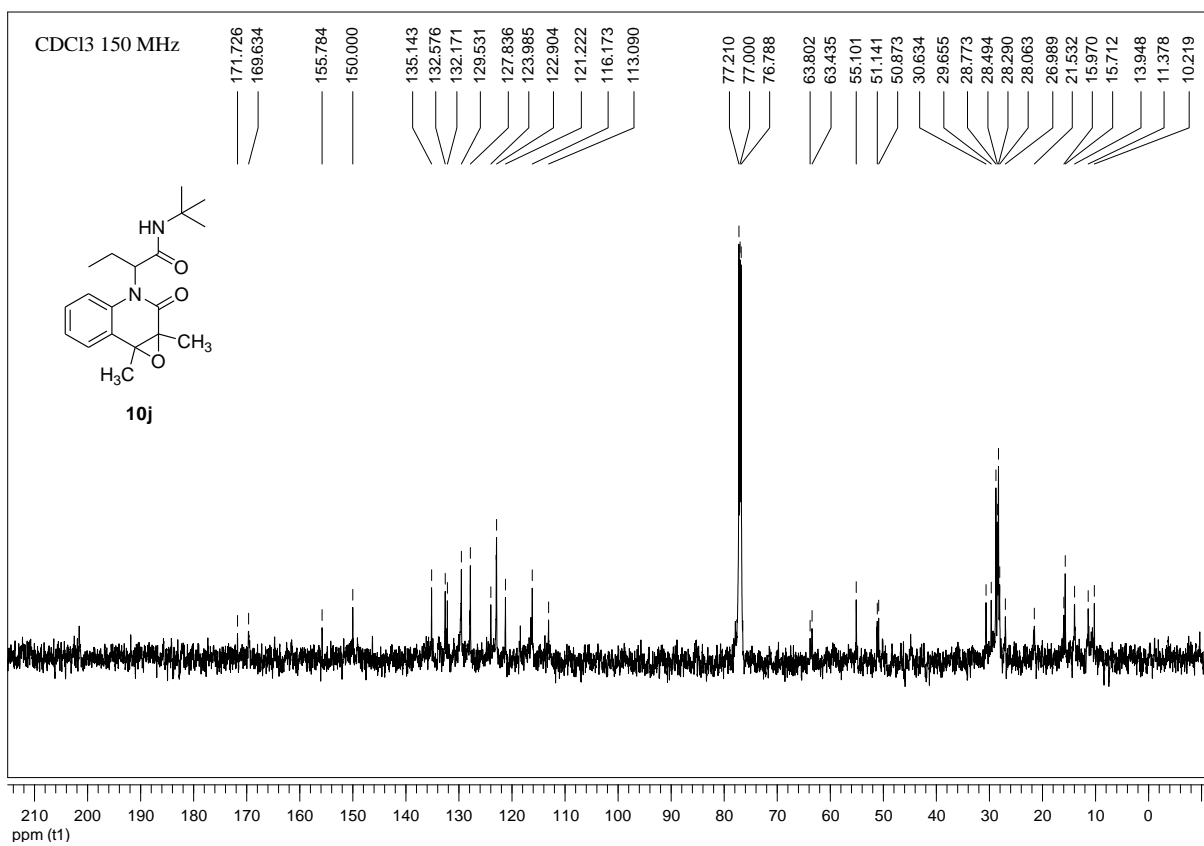

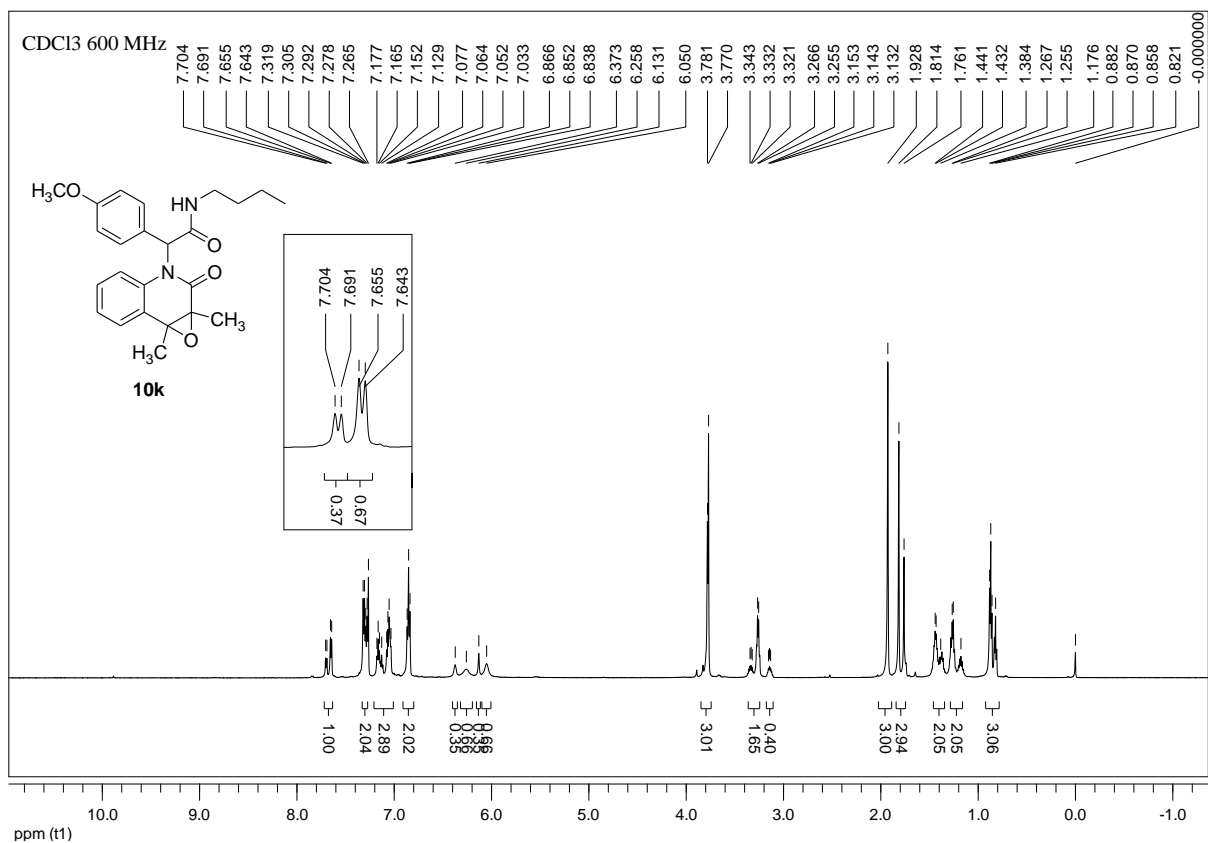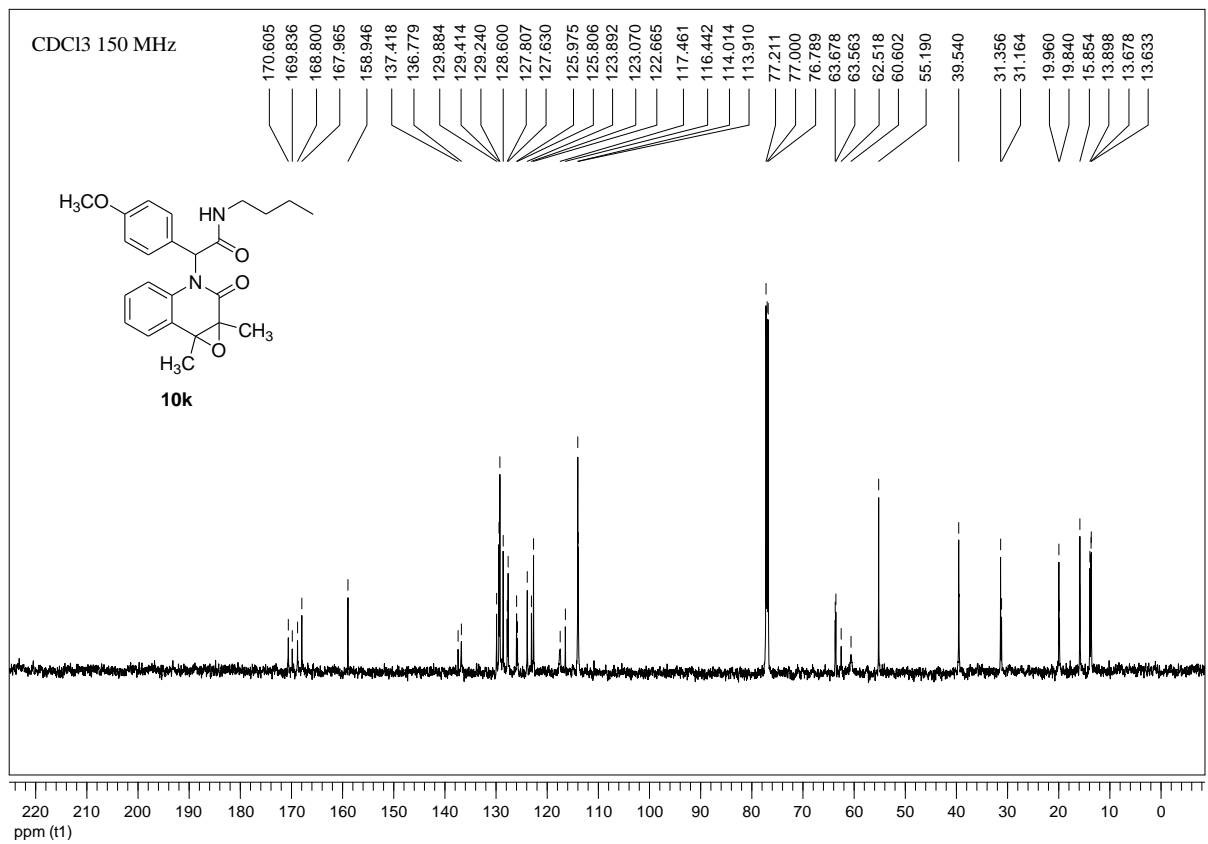

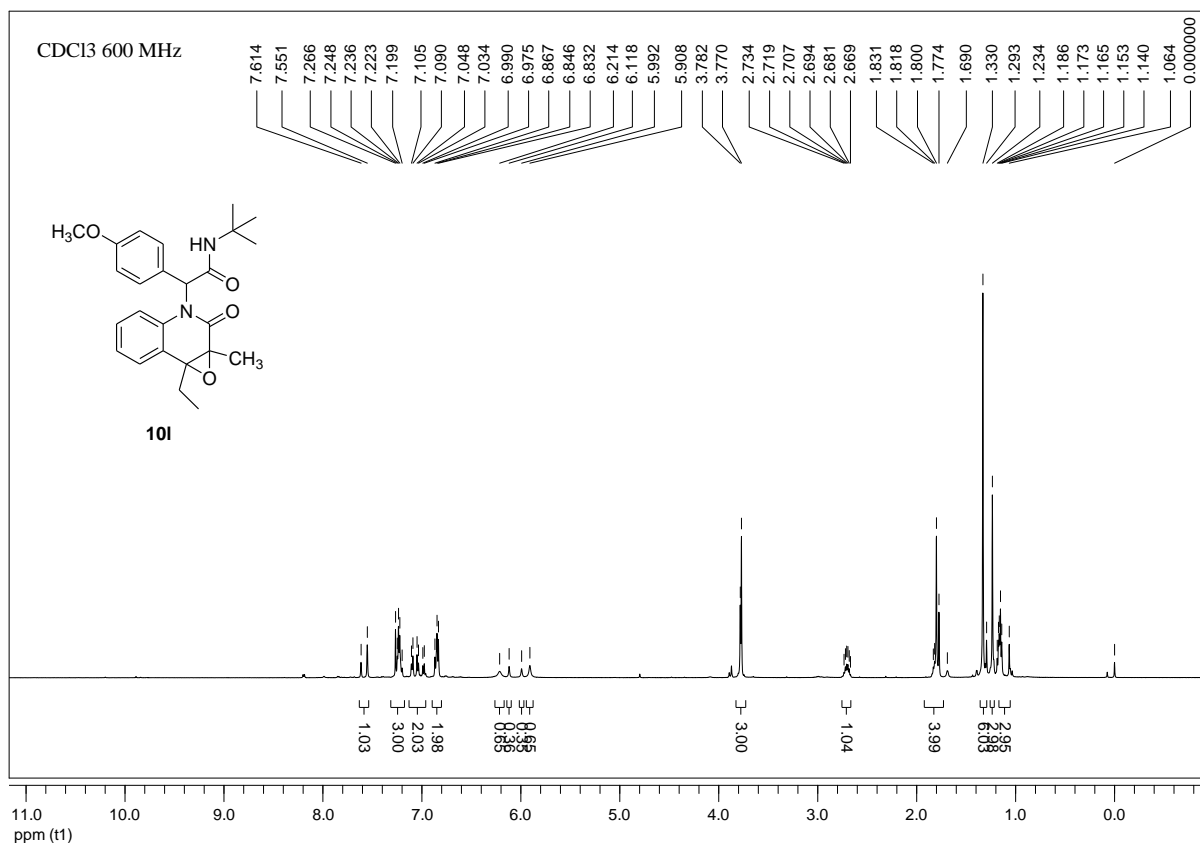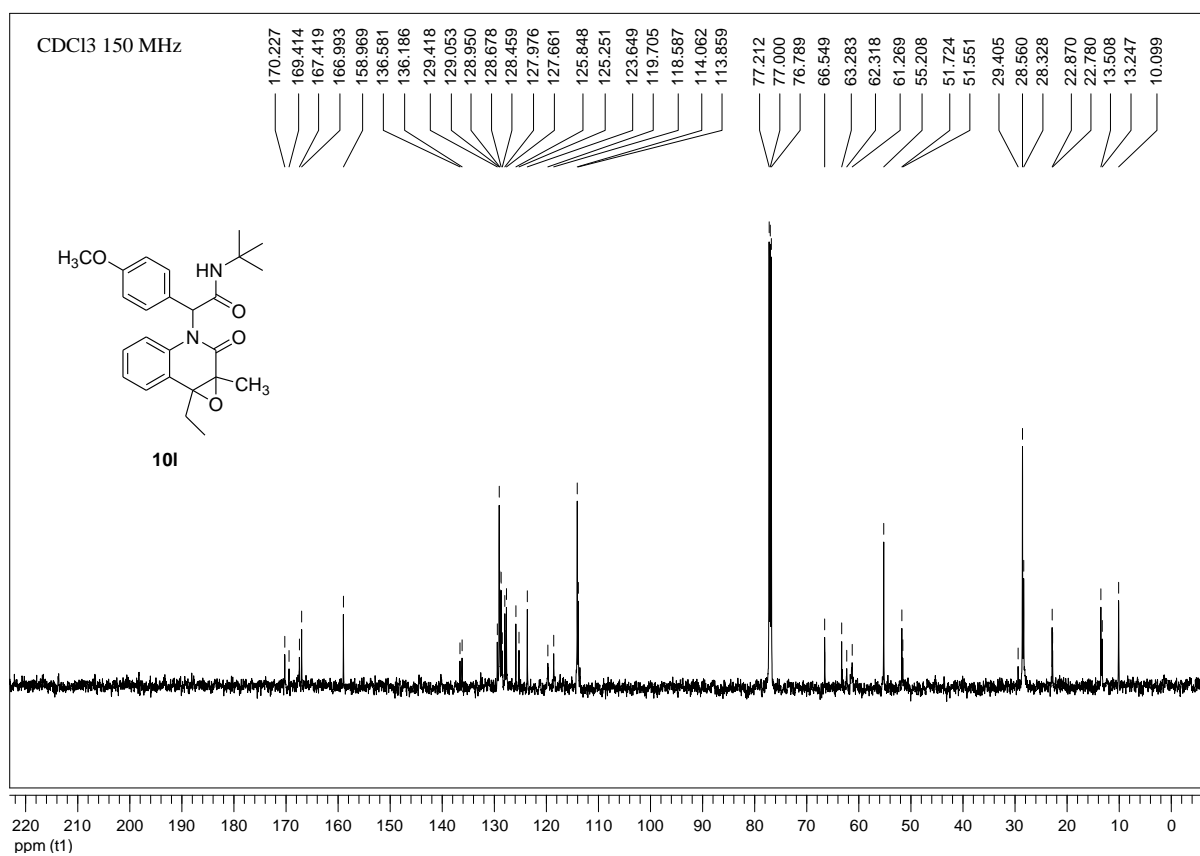

Supplement: d2qo01130a1.pdf [file d2qo01130a1.pdf]
